# Supplementary material for: H-Bond donor parameters for cations
Source: Royal Society of Chemistry journal article supplement (doi:10.1039/c9sc00721k), 2019-01-01
Supplement: c9sc00721k1.pdf [file c9sc00721k1.pdf]

## Supporting Information

### H-Bond Donor Parameters for Cations

Sarah J. Pike,<sup>a</sup> Ennio Lavagnini,<sup>a</sup> Lisa M. Varley,<sup>b</sup> Joanne L. Cook,<sup>c</sup>

Christopher A. Hunter<sup>a\*</sup>

<sup>a</sup>Department of Chemistry, University of Cambridge, Cambridge, CB2 1EW, UK.

<sup>b</sup>Department of Chemistry, University of Sheffield, Sheffield, S3 7HF, UK.

<sup>c</sup>Unilever, R&D Port Sunlight, Quarry Road East, Bebington, Wirral, CH63 3JW, UK.

Email: [hershelsmith.orgchem@ch.cam.ac.uk](mailto:hershelsmith.orgchem@ch.cam.ac.uk)

|                                                                                         |             |
|-----------------------------------------------------------------------------------------|-------------|
| <b>Contents</b>                                                                         | <i>S2</i>   |
| <b>General Experimental Details</b>                                                     | <i>S4</i>   |
| <b>Standard Method for UV/vis Absorption Spectroscopy Titrations</b>                    | <i>S5</i>   |
| <b>Standard Method for NMR Spectroscopy Titrations</b>                                  | <i>S6</i>   |
| <b>Synthetic Details</b>                                                                | <i>S7</i>   |
| <b>Titration Curves for Reichardt's dye (1) in Acetonitrile</b>                         | <i>S11</i>  |
| <b>Titration Curves for Reichardt's dye (1) in Acetone</b>                              | <i>S27</i>  |
| <b>Titration Curves for Reichardt's dye(1) in Acetonitrile with 0.1% H<sub>2</sub>O</b> | <i>S44</i>  |
| <b>Titration Curves for Reichardt's dye(1) I n MeCN with 0.25% H<sub>2</sub>O</b>       | <i>S47</i>  |
| <b>Titration Curves for Reichardt's dye(1) in MeCN with 0.5% H<sub>2</sub>O</b>         | <i>S50</i>  |
| <b>Titration Curves for Reichardt's dye(1) in MeCN with 1% H<sub>2</sub>O</b>           | <i>S53</i>  |
| <b>Titration Curves for Reichardt's dye(1) in Acetone with 0.1% H<sub>2</sub>O</b>      | <i>S55</i>  |
| <b>Titration Curves for Reichardt's dye(1) in acetone with 0.25% H<sub>2</sub>O</b>     | <i>S58</i>  |
| <b>Titration Curves for Reichardt's dye(1) in acetone with 0.5% H<sub>2</sub>O</b>      | <i>S61</i>  |
| <b>Titration Curves for Reichardt's dye(1) in acetone with 1% H<sub>2</sub>O</b>        | <i>S64</i>  |
| <b>Titration Curves for Reichardt's dye (1) in Chloroform - UV/vis</b>                  | <i>S67</i>  |
| <b>Titration Curves for Phosphine oxide (2) in Acetonitrile - UV/vis</b>                | <i>S70</i>  |
| <b>Titration Curves for Phosphine Oxide (2) in Chloroform – UV/vis</b>                  | <i>S73</i>  |
| <b>Titration Curves for Phosphine oxide (2) in Acetone – UV/vis</b>                     | <i>S77</i>  |
| <b>Titration Curves for Phosphine oxide (2) in Carbon Tetrachloride- UV/vis</b>         | <i>S78</i>  |
| <b>Titration Curves for Phosphine oxide (2) in Acetonitrile - NMR</b>                   | <i>S81</i>  |
| <b>Titration Curves for Phosphine oxide (2) in Acetone - NMR</b>                        | <i>S97</i>  |
| <b>Titration Curves for Phosphine oxide (2) in Chloroform – NMR</b>                     | <i>S116</i> |
| <b>Titration Curves for Phosphine oxide (2) in Carbon Tetrachloride- NMR</b>            | <i>S120</i> |
| <b>Summary of Association Constants for H-bonded complexes</b>                          | <i>S125</i> |



|                                                                                                       |             |
|-------------------------------------------------------------------------------------------------------|-------------|
| <b>Counterion Influence in Acetonitrile on <math>K</math> values of H-bonded complexes</b>            | <i>S128</i> |
| <b>Influence of the H<sub>2</sub>O on <math>K</math> values of H-bonded complexes in Acetonitrile</b> | <i>S130</i> |
| <b>Influence of the H<sub>2</sub>O on <math>K</math> values of H-bonded complexes in Acetone</b>      | <i>S135</i> |
| <b>Appendix: <sup>1</sup>H and <sup>13</sup>C NMR spectra for new compounds</b>                       | <i>S140</i> |
| <b>References</b>                                                                                     | <i>S152</i> |

## **General Experimental Details**

All compounds were purchased from Sigma-Aldrich unless otherwise stated. 4-Nitrophenol, 4-nitro,3-trifluoromethylphenol, tributylphosphine oxide, sodium trifluoromethanesulfonimide and bis(4-tert-butylphenyl)iodonium hexafluorophosphate were purchased from Aldrich. Sodium hexafluorophosphate, 5-nitroindole, potassium tetraphenylborate, 1-butyl-3-methylimidazolium hexafluorophosphate and 1-butyl-4-methylpyridinium hexafluorophosphate were purchased from Alfa Aesar. Sodium tetrafluoroborate was purchased from BDH Chemicals Ltd. Cesium tetraphenylborate, rubidium tetraphenylborate and lithium tetraphenylborate tris(1,2-dimethoxyethane) were purchased from Chem Cruz. Silver tetrafluoroborate was purchased from Acros Organic. Acetonitrile, acetone and chloroform were purchased from Acros as 99+% for spectroscopic grade. Carbon tetrachloride was purchased from Fluka Chemicals. All chemicals were used as received. All NMR spectroscopy was carried out on a Bruker AVI400 spectrometer using the residual solvent as the internal standard. All the chemical shifts ( $\delta$ ) are quoted in ppm and coupling constants are given in Hz. Splitting patterns are given as follows: s (singlet), br (broad), d (doublet), t (triplet), m (multiplet). FT-IR spectra were measured on a PerkinElmer Spectrum 100. Melting points were measured in a Mettler Toledo MP50 Melting Point System. ES+ was carried out on a Waters LCT-TOF spectrometer or a Waters Xevo G2-S bench top QTOF machine. All compounds were used as received. The measurements of solids were carried out on a Precisa 125A balance. All NMR experiments were carried out on a 400 MHz Bruker AMX400 spectrometer.

The following abbreviations are employed: Ar = aromatic, BA<sup>F</sup> = tetrakis(3,5-bis(trifluoromethyl)phenyl)borate, br = broad, Bu = butyl, Bz = benzyl, d = doublet, DMA = N,N-dimethylacetamide, DMF = dimethylformamide, DMSO = dimethylsulfoxide, Et = ethyl,

EtPipH<sup>+</sup> = 1-ethylpiperidinium, HBA = H-bond acceptor, HBD = H-bond donor, HMPA = hexamethylphosphoramide, m = multiplet, Me = methyl, m.p. = melting point, MePipH<sup>+</sup> = 1-methylpiperidinium, NMA = N-methylacetamide, Oct = octyl, Ph = phenyl, PipH<sup>+</sup> = piperidinium, R = 2-ethylhexyl, s = singlet, t = triplet, TBA = tetrabutylammonium, TFA = trifluoroacetic acid, THF = tetrahydrofuran.

### **Standard Method for UV/vis Absorption Titrations**<sup>1-4</sup>

Titration were carried out on a Cary 3 Bio UV-Vis spectrophotometer, using standard titration protocols. A 10 mL sample of the host, Reichardt' dye (**1**) was prepared at a known concentration (typically between 0.15 mM and 0.24 mM in MeCN (**1**), 0.16 mM and 0.20 mM in acetone (**1**), 0.04 mM and 0.12 mM in CHCl<sub>3</sub> (**1**). A 2 mL portion of this solution was removed and added to a quartz cuvette, and the UV/vis spectrum was recorded. The guest (**3-27**) was dissolved in 1-2 mL of the host solution. Aliquots of this solution were successively added to the cuvette, and the UV/vis absorption spectrum was recorded after each addition. The UV/vis absorption spectra were analysed using a Microsoft Excel spreadsheet to fit the changes in the absorption at fixed wavelengths to a 1:1 binding isotherm by optimizing the association constant and absorption of the free and bound host using purpose-written VBA macros.

For a given estimate of the association constant ( $K$ ), an iterative VBA macro was used to solve Equations S1-S3 for the concentrations of all species present in the cuvette at every point in the titration.

$$[H \cdot G] = K [H] [G] \quad (\text{Equ. S1})$$

where  $[H]$  is the concentration of free host,  $[G]$  is the concentration of free guest and  $[H \cdot G]$  is the concentration of complex.

$$[G]_0 = [G] + [H \cdot G] \quad (\text{Equ. S2})$$

where  $[G]_0$  is the total concentration of guest in the cuvette.

$$[H]_0 = [H] + [H \cdot G] \quad (\text{Equ. S3})$$

where  $[H]_0$  is the total concentration of guest in the cuvette.

For a given estimate of the extinction coefficients of the free and bound host ( $\epsilon_H$  and  $\epsilon_{H \cdot G}$ ), the absorbance (A) at every point in the titration was calculated using Equation S4.

$$A = \epsilon_H [H] + \epsilon_{H \cdot G} [H \cdot G] \quad (\text{Equ. S4})$$

The values of  $K$ ,  $\epsilon_H$  and  $\epsilon_{H \cdot G}$  were then optimised to minimise the difference between the experimental and calculated values of A using an iterative VBA macro. In a small number of cases, only 50% saturation of the isotherm was reached, but the consistency in the fitted values of the bound extinction coefficients with experiments that did reach saturation provides confidence in the accuracy of the association constant (Table S1).

### **Standard Method for NMR Spectroscopy Titrations<sup>5</sup>**

Titration experiments were carried out on a BB 500 MHz spectrometer, using standard titration protocols.<sup>1</sup> A 5 mL sample of the host was prepared at a known concentration (typically between 4 mM and 7 mM in MeCN (**2**), 4 mM and 7 mM in acetone (**2**), 0.1 mM and 5 mM in CHCl<sub>3</sub> (**2**) and 0.10 mM and 1.5 mM in CCl<sub>4</sub> (HBD)). A 0.6 mL portion of this solution was removed and added to a NMR tube, and the NMR spectrum was recorded. The guest (**3-27** in MeCN or acetone, and **2** in CCl<sub>4</sub>) was dissolved in 2.5 mL of the host solution to avoid dilution of the host during the titration experiments. Aliquots of this solution were successively added to the NMR tube, and the NMR spectrum was recorded after each addition. The NMR spectra were analysed using a Microsoft Excel spreadsheet to fit the changes in the <sup>31</sup>P or <sup>1</sup>H NMR chemical shift as a function of concentration of the guest species to a 1:1 binding isotherm by optimizing the association constant and absorption of the free and bound host using purpose-written VBA macros. Deuterated solvents were used for titrations in acetonitrile and chloroform whilst titration experiments conducted in acetone ((CH<sub>3</sub>)<sub>2</sub>CO) and carbon tetrachloride, a capillary containing D<sub>2</sub>O was added to the NMR tube.

For a given estimate of the association constant ( $K$ ), an iterative VBA macro was used to solve Equations S1-S3 for the concentrations of all species present in the NMR tube at every point in the titration. For a given estimate of the chemical shifts of the free and bound host ( $\delta_H$  and  $\delta_{H\cdot G}$ ), the chemical shift ( $\delta$ ) at every point in the titration was calculated using Equation S5.

$$\delta = \delta_H [H]/[H]_0 + \delta_{H\cdot G} [H\cdot G]/[H]_0 \quad (\text{Equ. S5})$$

The values of  $K$ ,  $\delta_H$  and  $\delta_{H\cdot G}$  were then optimised to minimise the difference between the experimental and calculated values of  $\delta$  using an iterative VBA macro. In all cases, greater than 60% saturation of the binding isotherm was reached.

## **Synthetic Details**

### **Guanidinium tetraphenylborate**

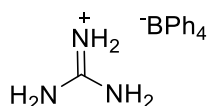

To a solution of guanidinium hydrochloride (0.028 g, 0.29 mmol) in H<sub>2</sub>O (5 mL) was added a solution of sodium tetraphenylborate (100 mg, 0.29 mmol) in H<sub>2</sub>O (5 mL) and the resultant solution was left stirring at room temperature for 10 mins. The white precipitate that had formed was filtered off, washed with H<sub>2</sub>O (3 x 10 mL) and dried to give the desired compound as a white solid. (105 mg, 95%) m.p. 220-223 °C; <sup>1</sup>H NMR (400 MHz, CD<sub>3</sub>CN, 298 K):  $\delta$  7.30 – 7.25 (8H, m, ArH), 7.00 (8H, t, 4J = 8.0 Hz, ArH), 6.87 – 6.82 (4H, m, ArH), 5.92 (6H, s, br, 2  $\times$  NH<sub>2</sub> and <sup>+</sup>NH<sub>2</sub>); <sup>13</sup>C NMR (100 MHz, CD<sub>3</sub>CN, 298 K):  $\delta$  164.8 (q), 158.8, 136.7 (q), 126.6 (q), 122.8; MS(ESI<sup>+</sup>): m/z (%): 60(100); Found: M, 60.0559, C<sub>1</sub>H<sub>6</sub>N<sub>3</sub> requires 60.0556).

## Triethylammonium tetraphenylborate

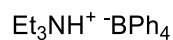

To a solution of triethylamine hydrochloride (0.040 g, 0.29 mmol) in H<sub>2</sub>O (5 mL) was added a solution of sodium tetraphenylborate (0.10 g, 0.29 mmol) in H<sub>2</sub>O (5 mL). The reaction mixture was left stirring for 10 mins at ambient temperature and the white precipitate that had formed was filtered off, collected, washed with H<sub>2</sub>O (3 x 10 mL) and dried to yield the desired product as a white solid (0.12 g, 93%). m.p. 182-184 °C; <sup>1</sup>H NMR (400 MHz, (CD<sub>3</sub>)<sub>2</sub>SO, 298 K): δ 8.79 (1H, s, br, *NH*<sup>+</sup>), 7.16-7.11 ( 8H, m, *ArH*), 6.88 (8H, t, J = 8 Hz, *ArH*), 6.75 (4H, t, J = 8 Hz, *ArH*), 3.04 (6H, q, J = 8 Hz, *CH*<sub>2</sub>), 1.12 (9H, t, J = 8 Hz, *CH*<sub>3</sub>) ppm; <sup>13</sup>C NMR (100 MHz, (CD<sub>3</sub>)<sub>2</sub>SO, 298 K): δ 163.3 (q), 135.6, 125.3 (q), 121.6, 45.8, 8.7 ppm; MS(ESI<sup>+</sup>): m/z (%): 102(100); Found: M, 102.1278, C<sub>6</sub>H<sub>16</sub>N requires 102.1277).

## 2-Ethylhexylammonium tetraphenylborate

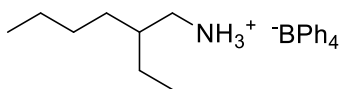

To a solution of 2-ethylhexylamine (0.5 mL, 2.9 mmol) in 1 M HCl (25 mL) was added a solution of sodium tetraphenylborate (1.0 g, 2.9 mmol) in  $\text{H}_2\text{O}$  (25 mL). The reaction mixture was left stirring for 10 mins at ambient temperature and the white precipitate that had formed was filtered off, collected, washed with  $\text{H}_2\text{O}$  (3 x 25 mL) and dried to yield the desired product as a white solid (1.2 g, 92%).  $^1\text{H}$  NMR (400 MHz,  $(\text{CD}_3)_2\text{CO}$ , 298 K):  $\delta$  6.92 (3H, s, br,  $\text{NH}_3^+$ ), 6.55-6.51 (8H, m,  $\text{ArH}$ ), 6.13 (8H, t,  $J = 8$  Hz,  $\text{ArH}$ ), 5.98 (4H, t,  $J = 8$  Hz,  $\text{ArH}$ ), 2.18 (2H, s,  $\text{CH}_2$ ), 0.94-0.87 (1H, m,  $\text{CH}$ ), 0.65-0.45 (8H, m,  $\text{CH}_2$ ), 0.09-0.05 (6H, m,  $\text{CH}_3$ ) ppm;  $^{13}\text{C}$  NMR (100 MHz,  $(\text{THF}-d_8)$ , 298 K):  $\delta$  165.1 (q), 137.0, 126.2 (q), 122.3, 44.4, 35.8, 30.8, 29.3, 23.81, 23.79, 14.4, 10.5 ppm; MS( $\text{ESI}^+$ ):  $m/z$  (%): 130(100); Found: M, 130.1585,  $\text{C}_8\text{H}_{20}\text{N}$  requires 130.1590).

## 1-methylimidazolium tetraphenylborate

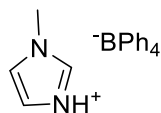

To a solution of 1-methylimidazolium chloride (0.035 g, 0.29 mmol) in  $\text{H}_2\text{O}$  (5 mL) was added a solution of sodium tetraphenylborate (0.10 g, 0.29 mmol) in  $\text{H}_2\text{O}$  (5 mL). The reaction mixture was left stirring for 10 mins at ambient temperature and the white precipitate that had formed was filtered off, collected, washed with  $\text{H}_2\text{O}$  (3 x 10 mL) and dried to yield the desired product as a white solid (0.11 g, 92%). m.p. 240-242 °C;  $^1\text{H}$  NMR (400 MHz,  $(\text{CD}_3)_2\text{SO}$  298 K):  $\delta$  8.85 (1H, s, *CH*), 7.55 (2H, d,  $J = 16$  Hz, *CH*), 7.30-7.26 (8H, m, *ArH*), 7.00 (8H, t,  $J = 8$  Hz, *ArH*), 6.85 (4H, t,  $J = 8.0$  Hz, *ArH*), 3.74 (3H, s,  $\text{CH}_3$ ) ppm;  $^{13}\text{C}$  NMR (100 MHz,  $(\text{CD}_3)_2\text{SO}$  298 K):  $\delta$  163.4 (q), 135.64, 135.63, 125.4 (q), 123.1, 121.7, 119.8, 35.3 ppm; MS ( $\text{ESI}^+$ ):  $m/z$  83(100%); Found:  $M$  83.0606,  $\text{C}_4\text{H}_7\text{N}_2$  requires 83.0604).



## 2. Titration Curves for Reichardt's dye (1) in Acetonitrile

### a) Titration of Reichardt's dye with 4-azophenol in acetonitrile

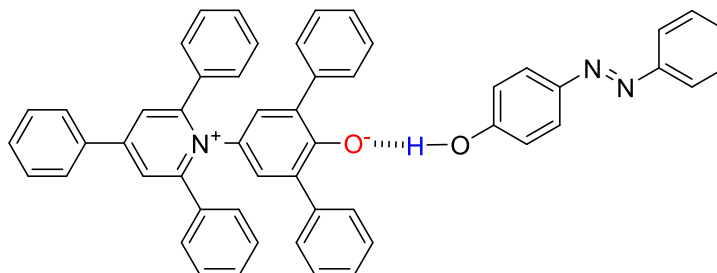

Host: Reichardt's dye = 0.16 mM

Guest: 4-phenylazophenol = 42 mM

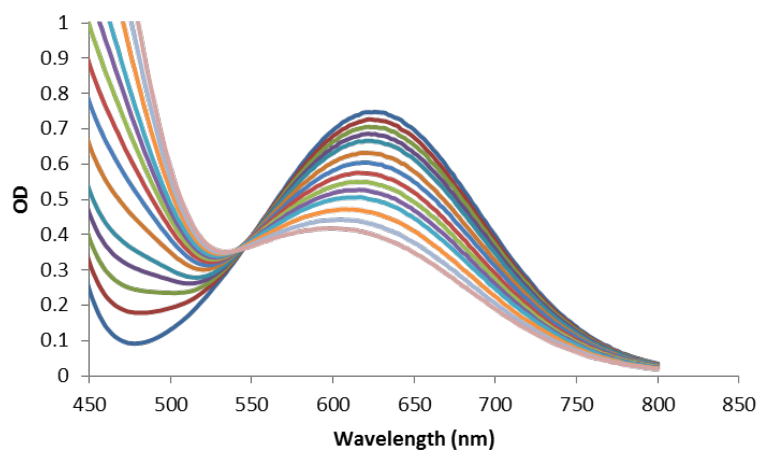

Graph S1. UV/vis spectra of titration of Reichardt's dye with 4-phenylazophenol in acetonitrile.

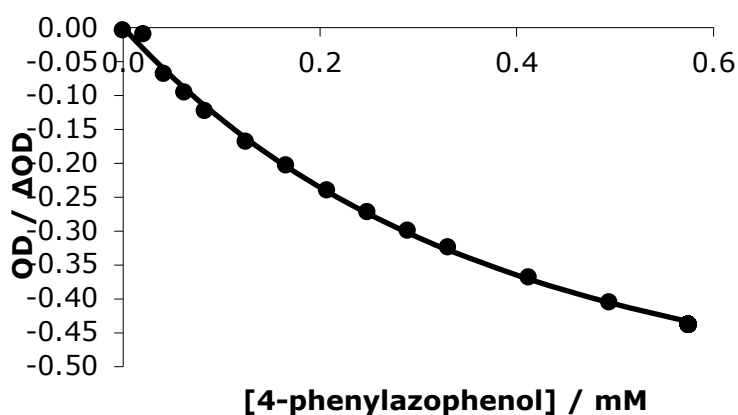

Graph S2. Binding isotherms for titration using 1:1 fitting program for titration of 4-phenylazophenol against Reichardt's dye in acetonitrile. [Reichardt's dye] = 0.16 mM and [4-phenylazophenol] = 42 mM,  $\Delta OD = -0.694$ .

$$K_a = 3100 \pm 650 \text{ M}^{-1} \quad 63\% \text{ bound}$$

b) Titration of Reichardt's dye with phenol in acetonitrile

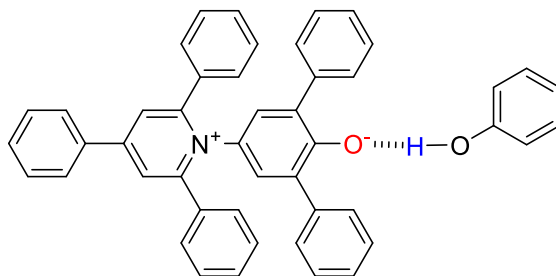

Host: Reichardt's dye = 0.16 mM

Guest: phenol = 95 mM

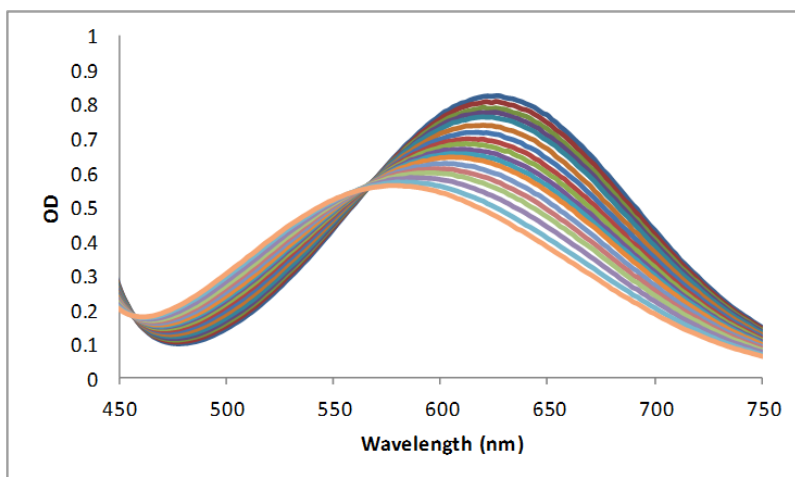

Graph S3. UV/vis spectra of titration of phenol with Reichardt's dye in acetonitrile.

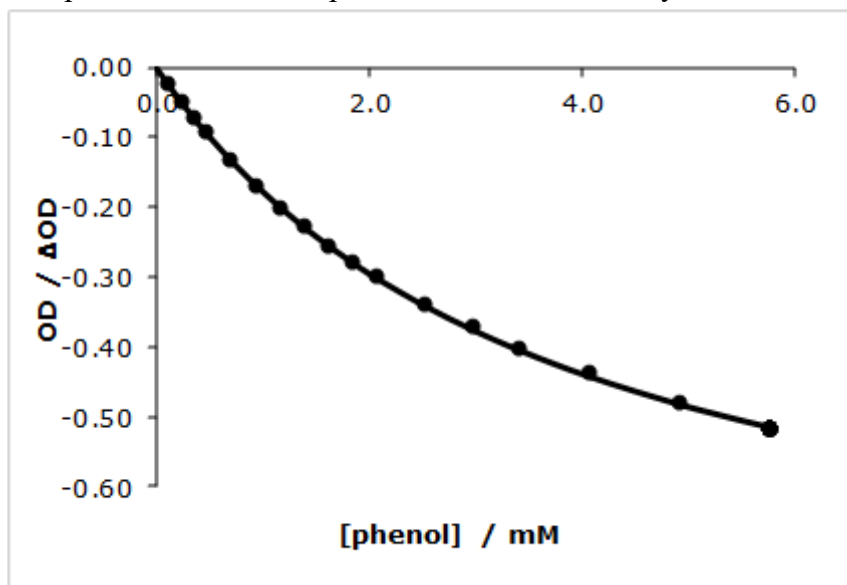

Graph S4. Binding isotherms for titration using 1:1 fitting program for titration of phenol against Reichardt's dye in acetonitrile. [Reichardt's dye] = 0.16 mM and [phenol] = 95 mM,  $\Delta OD = -0.844$

$$K_a = 260 \pm 63 \text{ M}^{-1} \quad 61\% \text{ bound}$$

c) Titration of Reichardt's dye with 5-nitroindole in acetonitrile

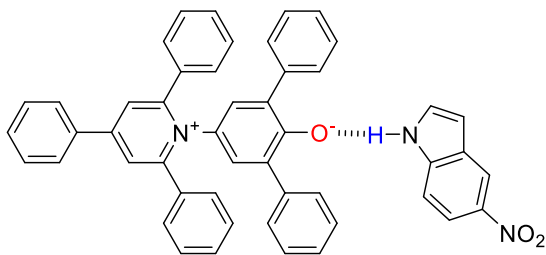

Host: Reichardt's dye = 0.17 mM

Guest: 5-nitroindole = 23 mM

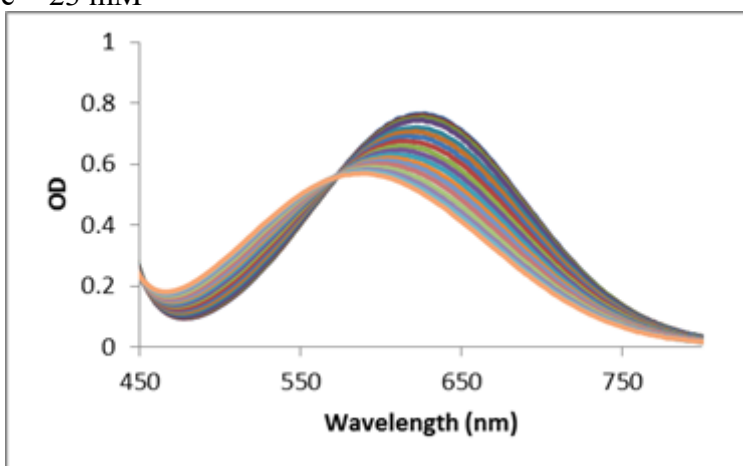

Graph S5. UV/vis spectra of titration of Reichardt's dye with 5-nitroindole in acetonitrile.

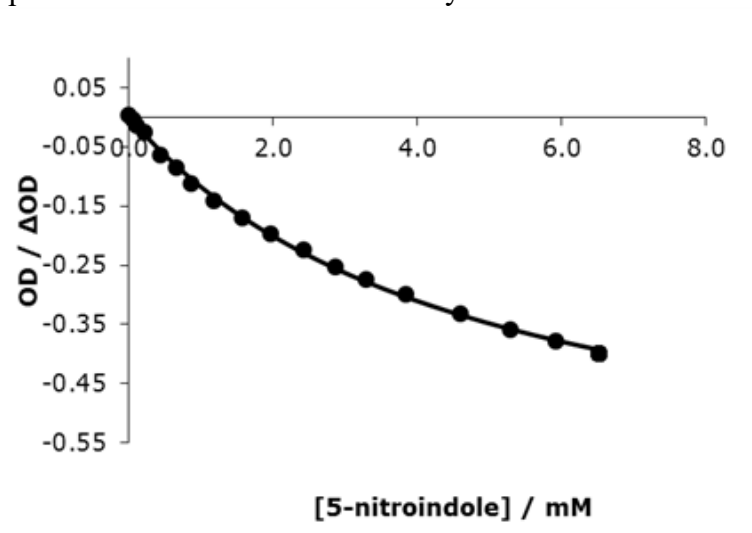

Graph S6. Binding isotherms for titration using 1:1 fitting program for titration of 5-nitroindole against Reichardt's dye in acetonitrile. [Reichardt's dye] = 0.17 mM and [5-nitroindole] = 23 mM,  $\Delta OD = -0.671$ .

$$K_a = 200 \pm 50 \text{ M}^{-1} \quad 58\% \text{ bound}$$

d) Titration of Reichardt's dye with TFA in acetonitrile

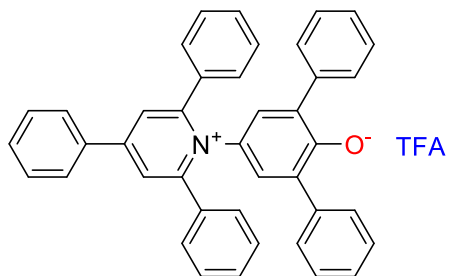

Host: Reichardt's dye = 0.16 mM

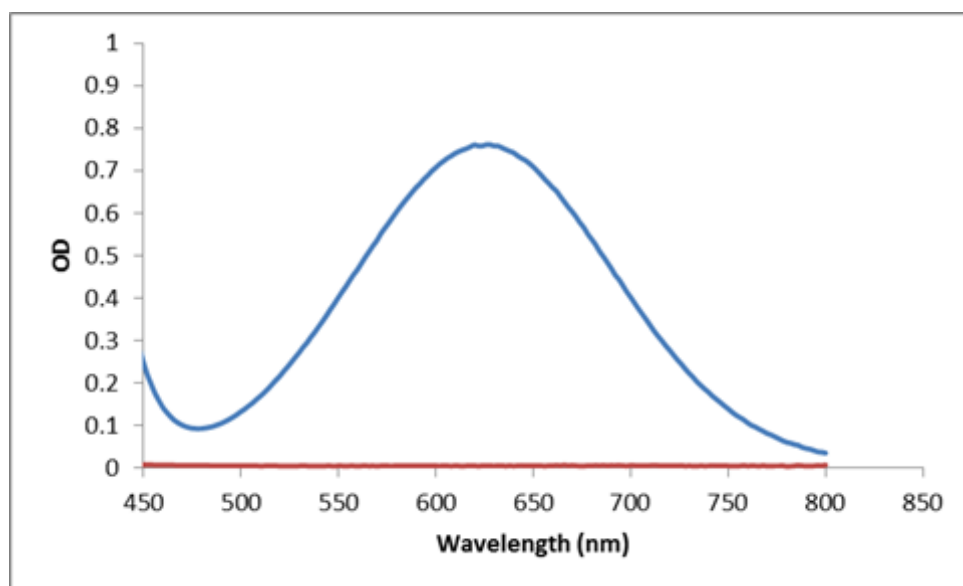

*Graph S7.* UV/vis spectra of Reichardt's dye when treated with 10  $\mu$ L of TFA in acetonitrile.

e) Titration of Reichardt's dye with 4-nitro,3-trifluoromethylphenol in acetonitrile

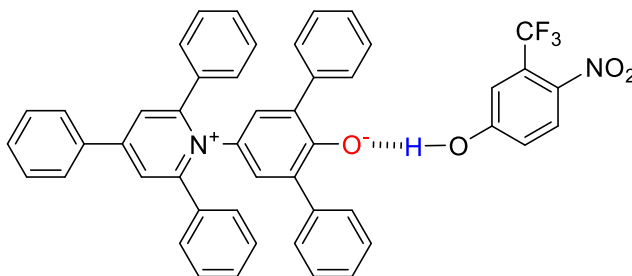

Host: Reichardt's dye = 0.15 mM

Guest: 4-nitro,3-trifluoromethylphenol = 11 mM

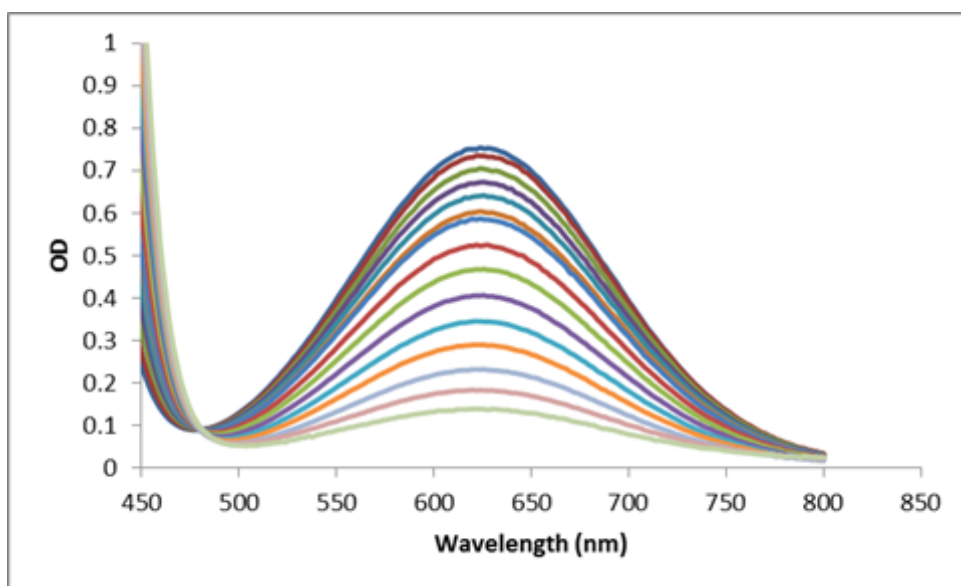

*Graph S8.* UV/vis spectra of titration of 4-nitro,3-trifluoromethylphenol with Reichardt's dye in acetonitrile.

f) Titration of Reichardt's dye with  $\text{Ph}_3\text{C}^+.\text{BF}_4^-$  in acetonitrile

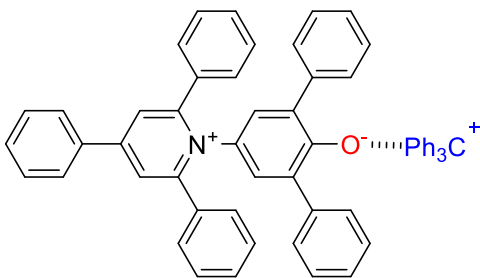

Host: Reichardt's dye = 0.16 mM

Guest:  $\text{PhC}_3.\text{BF}_4 = 15 \text{ mM}$

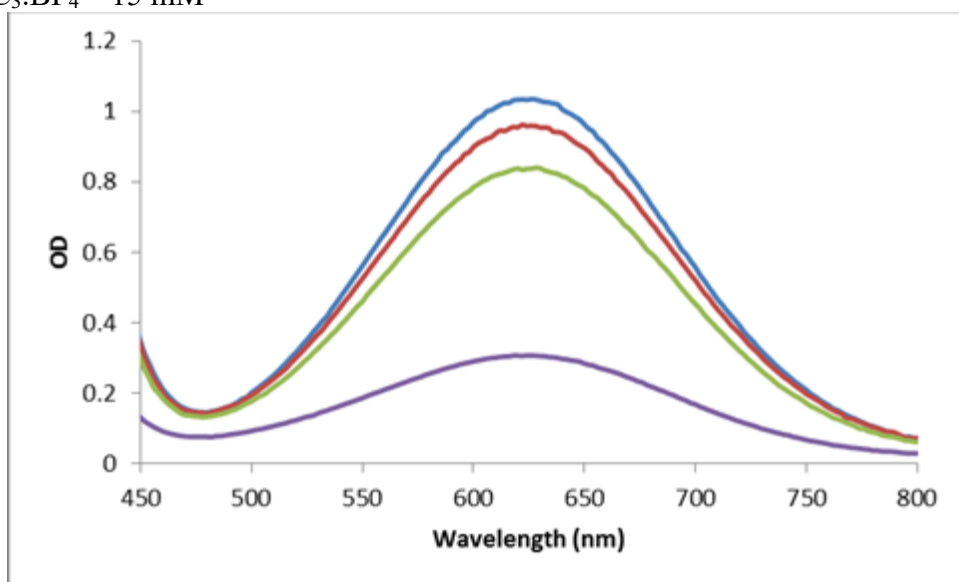

*Graph S9.* UV/vis spectra of titration of Reichardt's dye with  $\text{Ph}_3\text{C}^+.\text{BF}_4^-$  in acetonitrile.

g) Titration of Reichardt's dye with guanidinium.BPh<sub>4</sub> in acetonitrile

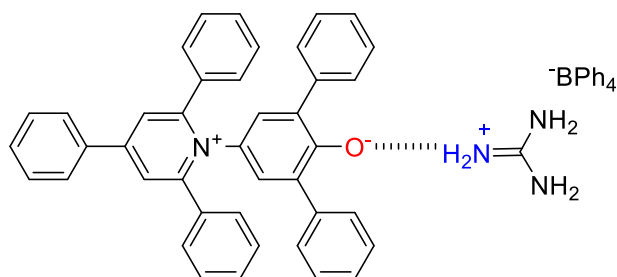

Host: Reichardt's dye = 0.20 mM

Guest: guanidinium.BPh<sub>4</sub> = 15 mM

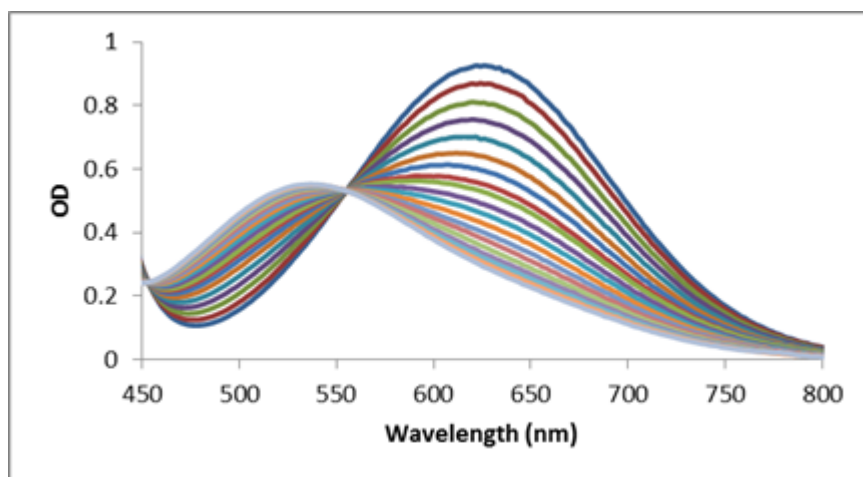

Graph S10. UV/vis spectra of titration of guanidinium.BPh<sub>4</sub> with Reichardt's dye in acetonitrile.

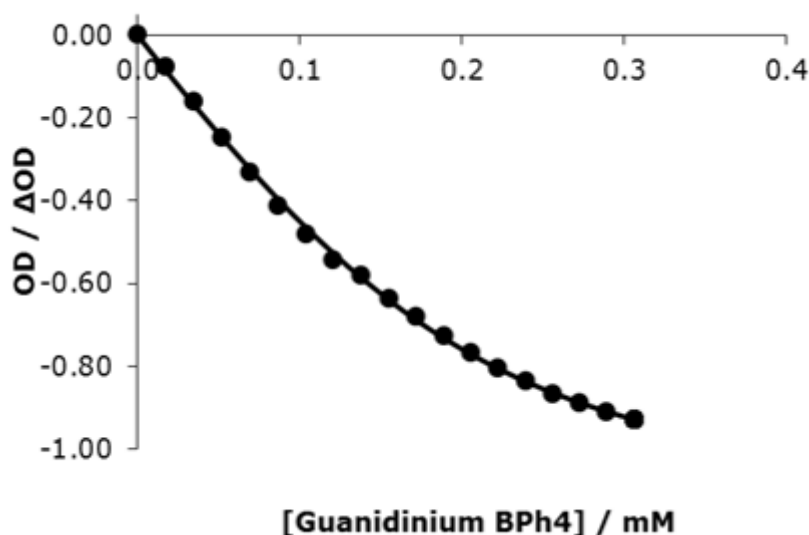

Graph S11. Binding isotherms for titration using 1:1 fitting program for titration of phenol against Reichardt's dye in acetonitrile. [Reichardt's dye] = 0.20 mM and [guanidinium.BPh<sub>4</sub>] = 14 mM,  $\Delta OD = -1.178$ .

$$K_a = 33800 \pm 2000 \text{ M}^{-1} \quad 79\% \text{ bound}$$

h) Titration of Reichardt's dye with LiBPh<sub>4</sub> tris(1,2-dimethoxyethane) in acetonitrile

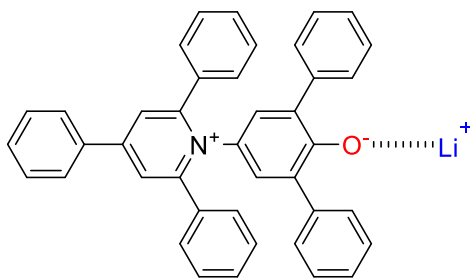

Host: Reichardt's dye = 0.2 mM

Guest: LiBPh<sub>4</sub> tris(1,2-dimethoxyethane) = 3 mM

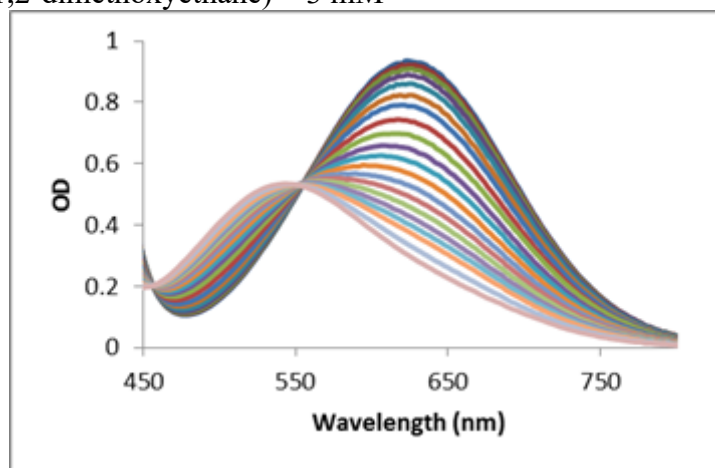

Graph S12. UV/vis spectra of titration of LiBPh<sub>4</sub> tris(1,2-dimethoxyethane) with Reichardt's dye in acetonitrile.

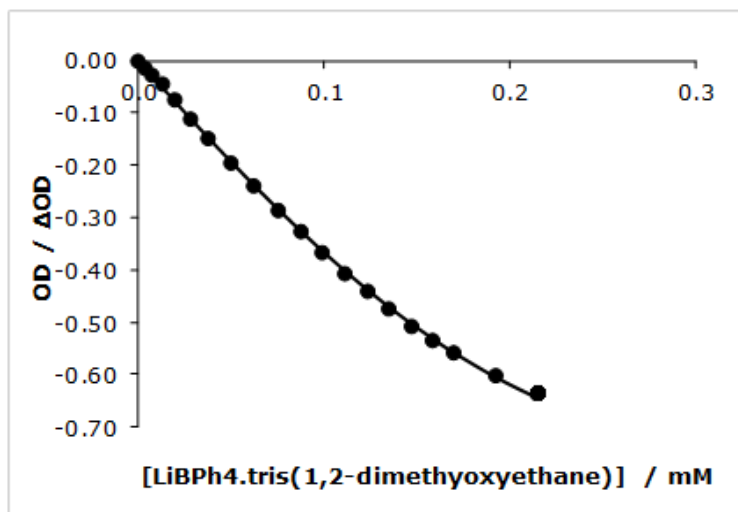

Graph S13. Binding isotherms for titration using 1:1 fitting program for titration of LiBPh<sub>4</sub> tris(1,2-dimethoxyethane) against Reichardt's dye in acetonitrile. [Reichardt's dye] = 0.2 mM and [LiBPh<sub>4</sub> tris(1,2-dimethoxyethane)] = 3 mM,  $\Delta OD = -0.924$ .

$$K_a = 27400 \pm 5900 \text{ M}^{-1} \quad 70\% \text{ bound}$$



i) Titration of Reichardt's dye with NaBPh<sub>4</sub> in acetonitrile

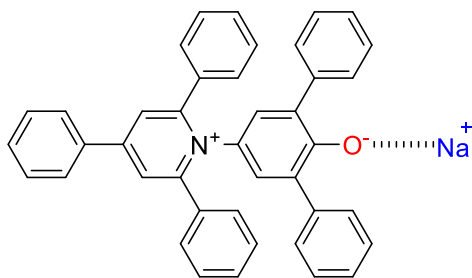

Host: Reichardt's dye = 0.2 mM

Guest: NaBPh<sub>4</sub> = 104 mM

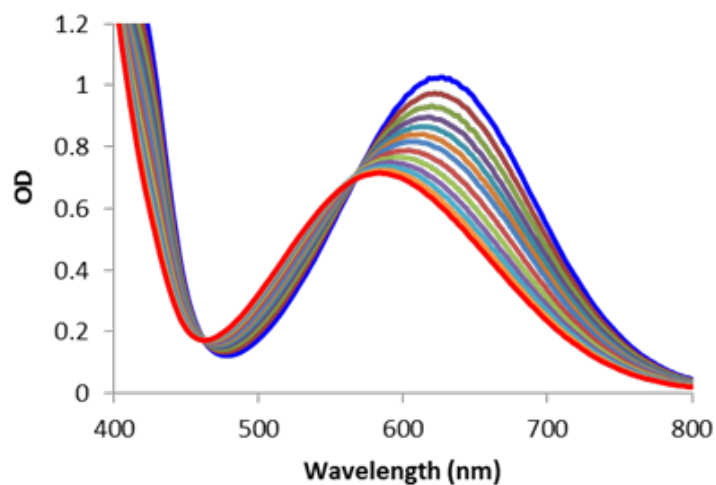

Graph S14. UV/vis spectra of titration of NaBPh<sub>4</sub> with Reichardt's dye in acetonitrile.

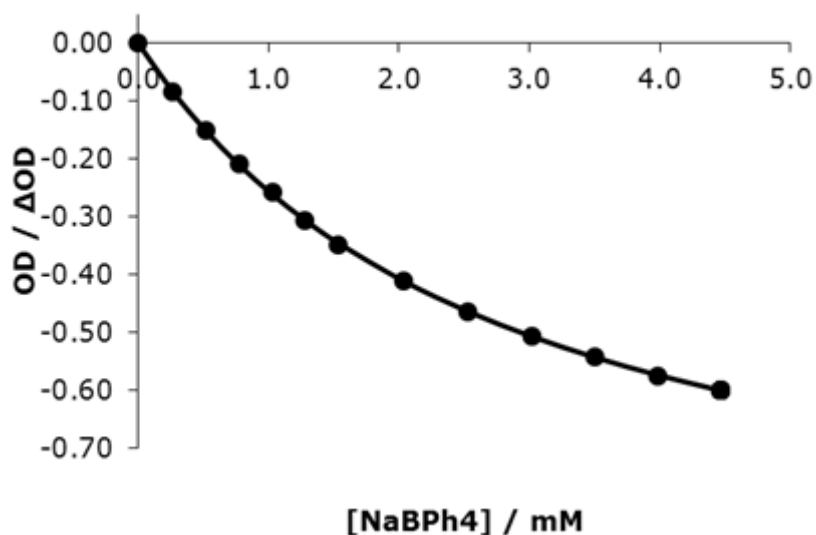

Graph S15. Binding isotherms for titration using 1:1 fitting program for titration of phenol against Reichardt's dye in acetonitrile. [Reichardt's dye] = 0.2 mM and [NaBPh<sub>4</sub>] = 104 mM,  $\Delta OD = -0.959$ .

$$K_a = 390 \pm 51 \text{ M}^{-1}$$

63% bound

j) Titration of Reichardt's dye with NaBF<sub>4</sub> in acetonitrile



Host: Reichardt's dye = 0.20 mM

Guest: NaBF<sub>4</sub> = 76 mM

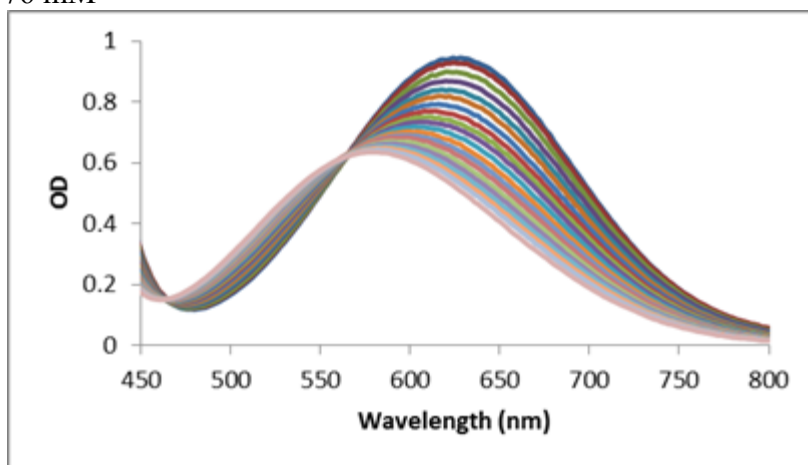

Graph S16. UV/vis spectra of titration of NaBF<sub>4</sub> with Reichardt's dye in acetonitrile.

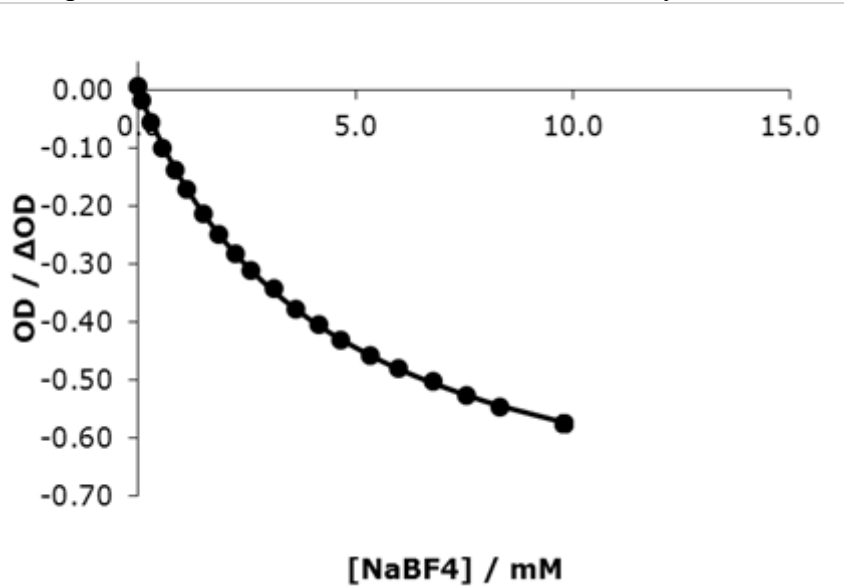

Graph S17. Binding isotherms for titration using 1:1 fitting program for titration of phenol against Reichardt's dye in acetonitrile. [Reichardt's dye] = 0.20 mM and [NaBF<sub>4</sub>] = 76 mM,  $\Delta OD = -0.817$ .

$$K_a = 300 \pm 90 \text{ M}^{-1}$$

70% bound

k) Titration of Reichardt's dye with 1-butyl-4-methylpyridiniumPF<sub>6</sub> in acetonitrile

Host: Reichardt's dye = 0.16 mM

Guest: 1-butyl-4-methylpyridiniumPF<sub>6</sub> = 569 mM

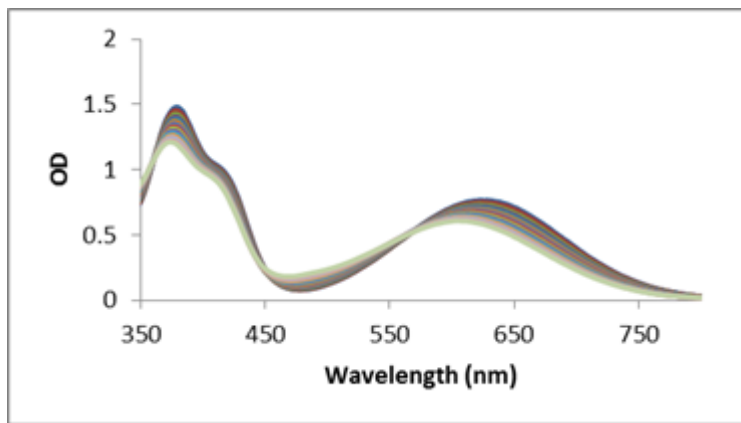

Graph S18. UV/vis spectra of titration of 1-butyl-4-methylpyridiniumPF<sub>6</sub> with Reichardt's dye in acetonitrile.

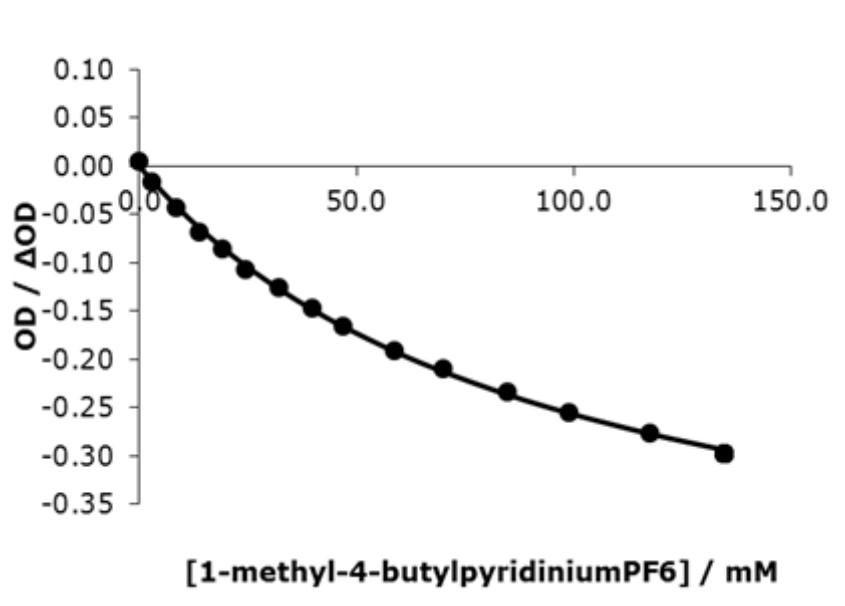

Graph S19. Binding isotherms for titration using 1:1 fitting program for titration of 1-butyl-4-methylpyridiniumPF<sub>6</sub> against Reichardt's dye in acetonitrile. [Reichardt's dye] = 0.16 mM and [1-butyl-4-methylpyridiniumPF<sub>6</sub>] = 569 mM,  $\Delta OD = -0.498$ .

$$K_a = 12 \pm 2 \text{ M}^{-1} \quad 59\% \text{ bound}$$

1) Titration of Reichardt's dye with 1-butyl-4-methylpyridiniumPF<sub>6</sub> in acetonitrile

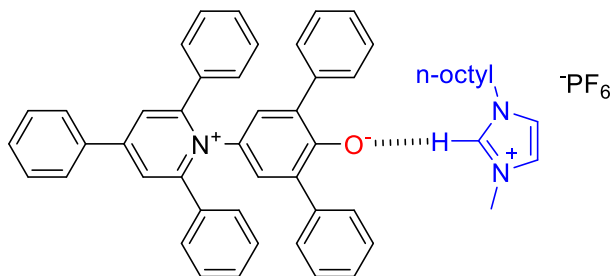

Host: Reichardt's dye = 0.16 mM

Guest: imidazoliumPF<sub>6</sub> = 374 mM

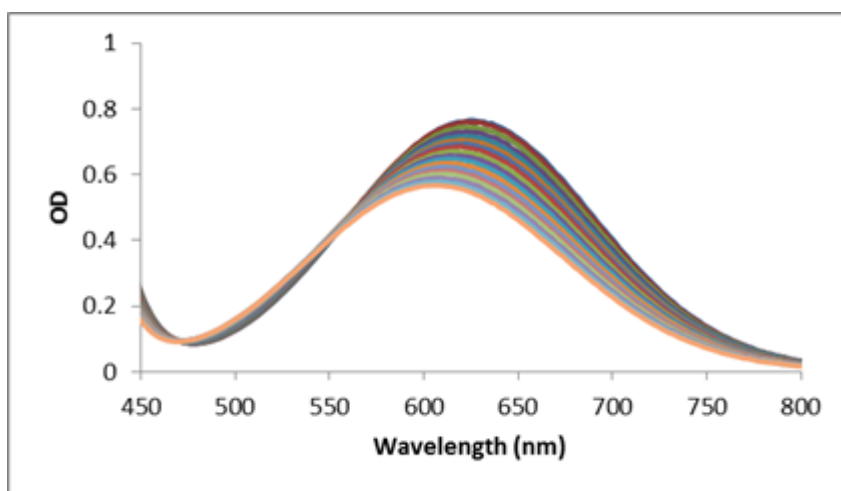

Graph S20. UV/vis spectra of titration of imidazoliumPF<sub>6</sub> with Reichardt's dye in acetonitrile.

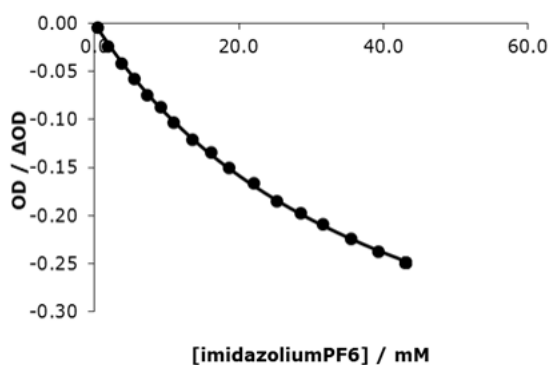

Graph S21. Binding isotherms for titration using 1:1 fitting program for titration of imidazoliumPF<sub>6</sub> against Reichardt's dye in acetonitrile. [Reichardt's dye] = 0.16 mM and [imidazoliumPF<sub>6</sub>] = 374 mM, ΔOD = -0.481.

$$K_a = 23 \pm 9 \text{ M}^{-1} \quad 51\% \text{ bound}$$

m) Titration of Reichardt's dye with  $\text{IPh}_2\text{BF}_4$  in acetonitrile

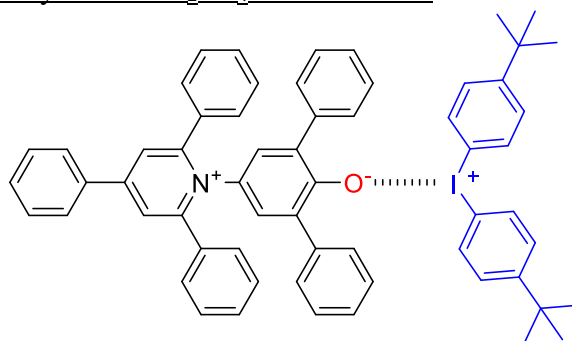

Host: Reichardt's dye = 0.24 mM

Guest:  $\text{IPh}_2\text{BF}_4$  = 44 mM

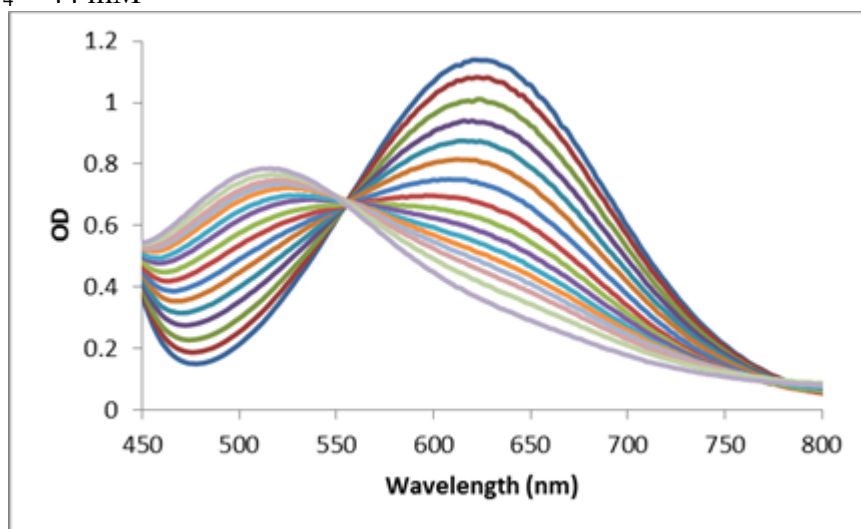

Graph S22. UV/vis spectra of titration of  $\text{IPh}_2\text{BF}_4$  with Reichardt's dye in acetonitrile.

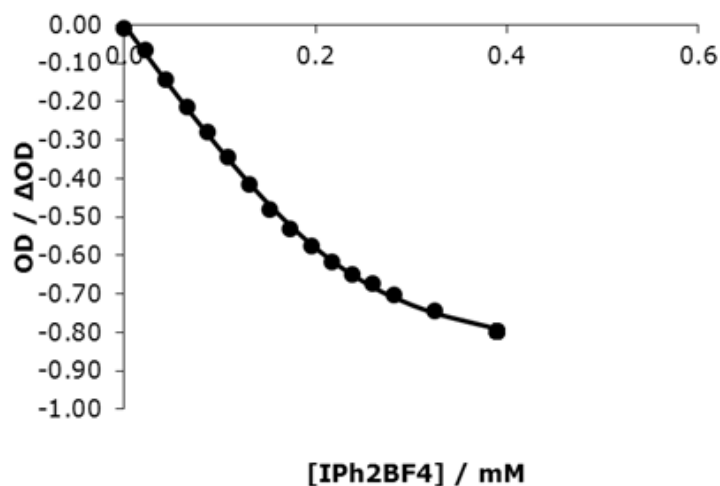

Graph S23. Binding isotherms for titration using 1:1 fitting program for titration of phenol against Reichardt's dye in acetonitrile.  $[\text{Reichardt's dye}] = 0.24 \text{ mM}$  and  $[\text{IPh}_2\text{BF}_4] = 44 \text{ mM}$ ,  $\Delta\text{OD} = -0.904$ .

$$K_a = 38300 \pm 1100 \text{ M}^{-1} \quad 87\% \text{ bound}$$

n) Titration of Reichardt's dye with NaBAr<sup>F</sup> in acetonitrile



Host: Reichardt's dye = 0.16 mM

Guest: NaBAr<sup>F</sup> = 123 mM

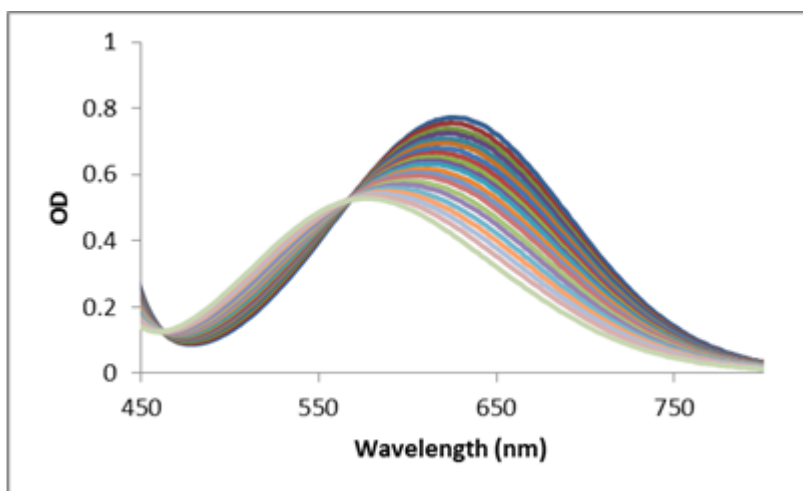

Graph S24. UV/vis spectra of titration of NaBAr<sup>F</sup> with Reichardt's dye in acetonitrile.

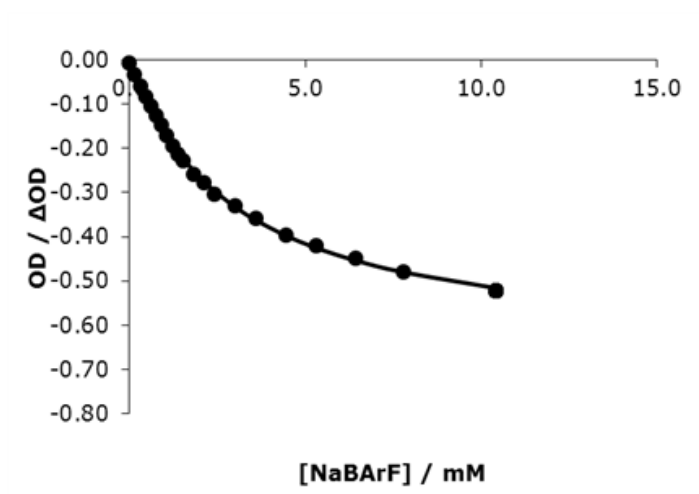

Graph S25. Binding isotherms for titration using 1:1 fitting program for titration of phenol against Reichardt's dye in acetonitrile. [Reichardt's dye] = 0.16 mM and [NaBAr<sup>F</sup>] = 123 mM,  $\Delta OD = -0.660$ .

$$K_a = 400 \pm 160 \text{ M}^{-1}$$

78% bound

o) Titration of Reichardt's dye with  $\text{NaN}(\text{SO}_2\text{CF}_3)_2$  in acetonitrile



Host: Reichardt's dye = 0.17 mM

Guest:  $\text{NaN}(\text{SO}_2\text{CF}_3)_2$  = 76 mM

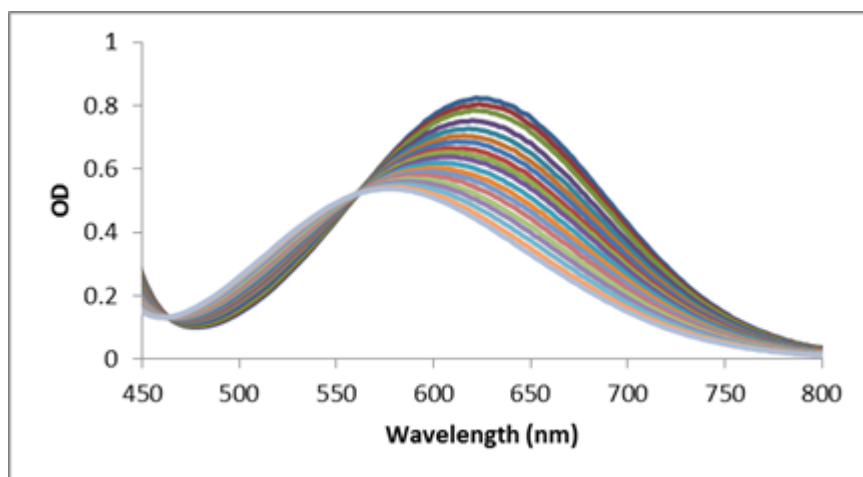

Graph S26. UV/vis spectra of titration of  $\text{NaN}(\text{SO}_2\text{CF}_3)_2$  with Reichardt's dye in acetonitrile.

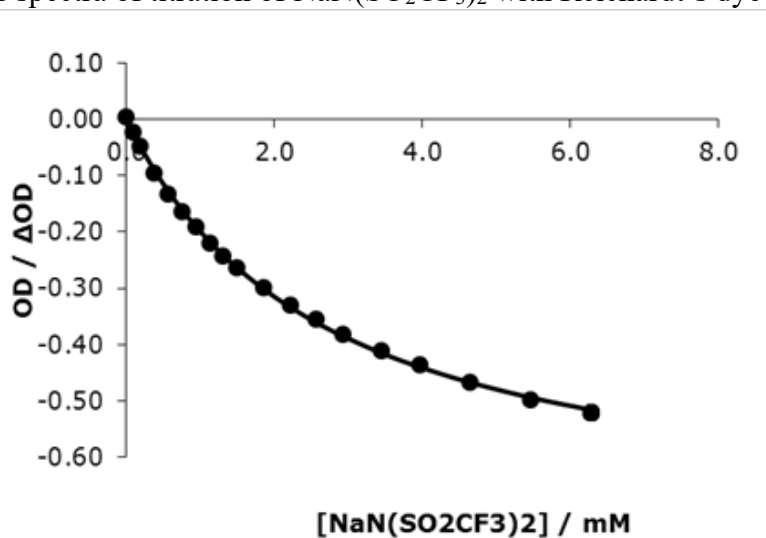

Graph S27. Binding isotherms for titration using 1:1 fitting program for titration of phenol against Reichardt's dye in acetonitrile.  $[\text{Reichardt's dye}] = 0.17 \text{ mM}$  and  $[\text{NaN}(\text{SO}_2\text{CF}_3)_2] = 76 \text{ mM}$ ,  $\Delta\text{OD} = -0.726$ .

$$K_a = 410 \pm 30 \text{ M}^{-1}$$

71% bound

p) Titration of Reichardt's dye with NaI in acetonitrile

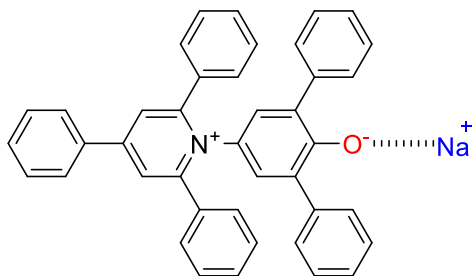

Host: Reichardt's dye = 0.20 mM

Guest: NaI = 142 mM

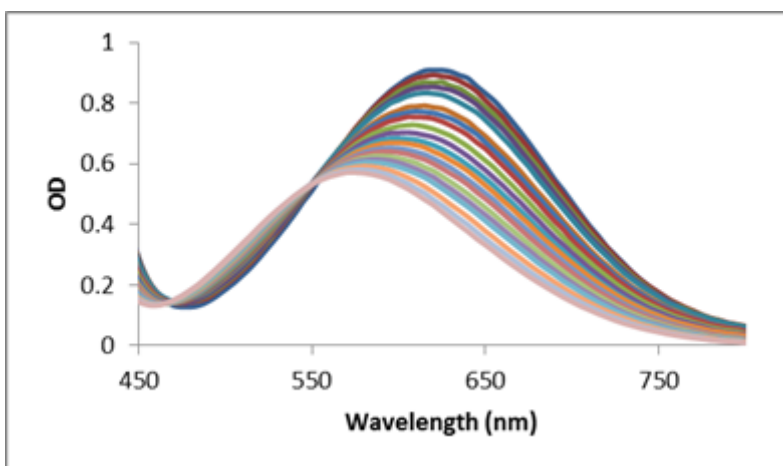

Graph S28. UV/vis spectra of titration of NaI with Reichardt's dye in acetonitrile.

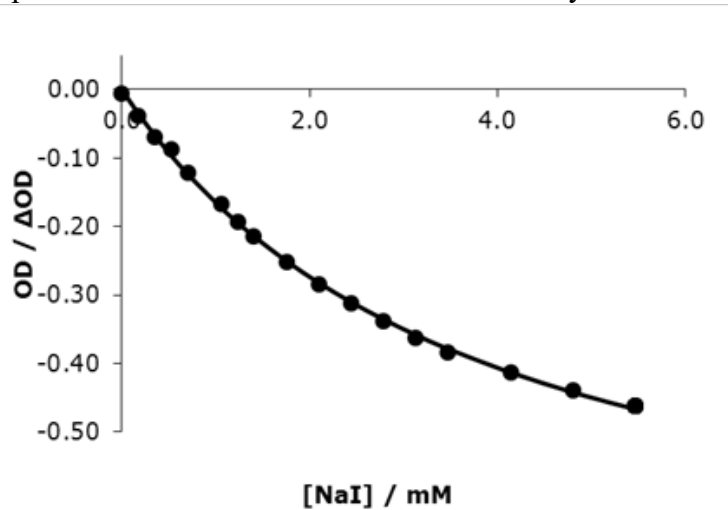

Graph S29. Binding isotherms for titration using 1:1 fitting program for titration of NaI against Reichardt's dye in acetone. [Reichardt's dye] = 0.20 mM and [NaI] = 142 mM,  $\Delta OD = -0.777$ .

$$K_a = 320 \pm 120 \text{ M}^{-1}$$

60% bound



### 3. Titration Curves for Reichardt's dye (1) in Acetone

#### a) Titration of Reichardt's dye with 4-phenylazophenol in acetone

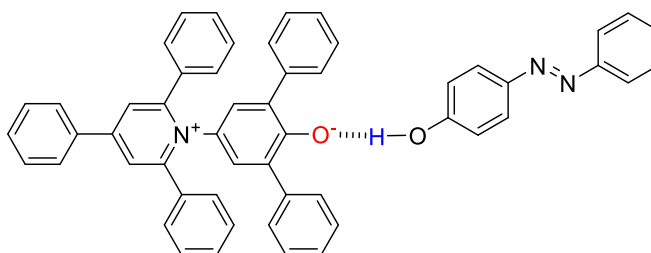

Host: Reichardt's dye = 0.17 mM

Guest: 4-phenylazophenol = 21 mM

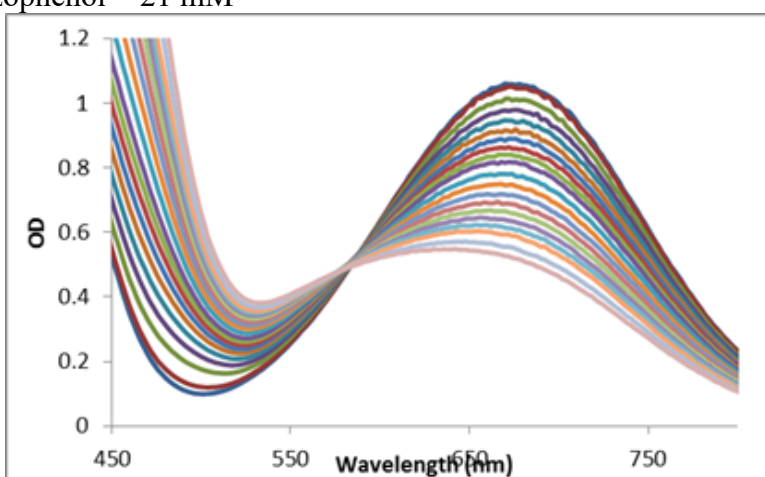

Graph S30. UV/vis spectra of titration of Reichardt's dye with 4-phenylazophenol in acetone.

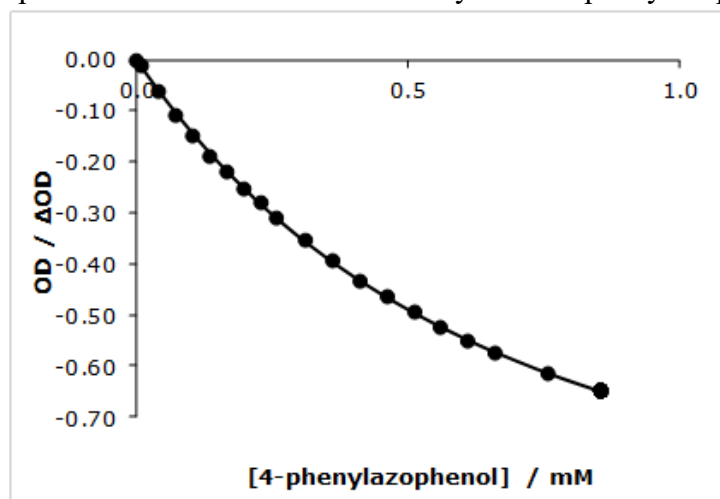

Graph S31. Binding isotherms for titration using 1:1 fitting program for titration of 4-phenylazophenol against Reichardt's dye in acetone. [Reichardt's dye] = 0.17 mM and [4-phenylazophenol] = 21 mM,  $\Delta OD = -1.124$ .

$$K_a = 2000 \pm 500 \text{ M}^{-1}$$

58% bound

b) Titration of Reichardt's dye with 5-nitroindole in acetone

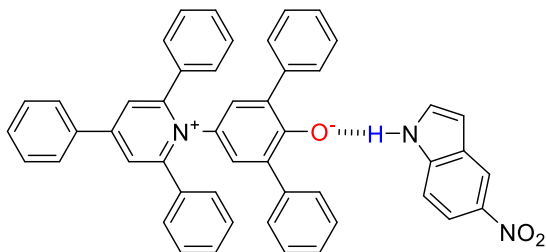

Host: Reichardt's dye = 0.15 mM

Guest: 5-nitroindole = 12 mM

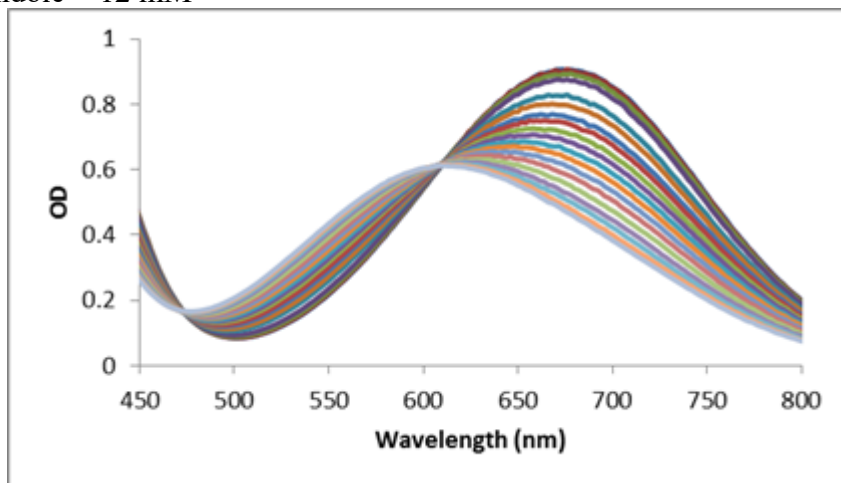

Graph S32. UV/vis spectra of titration of Reichardt's dye with 5-nitroindole in acetone.

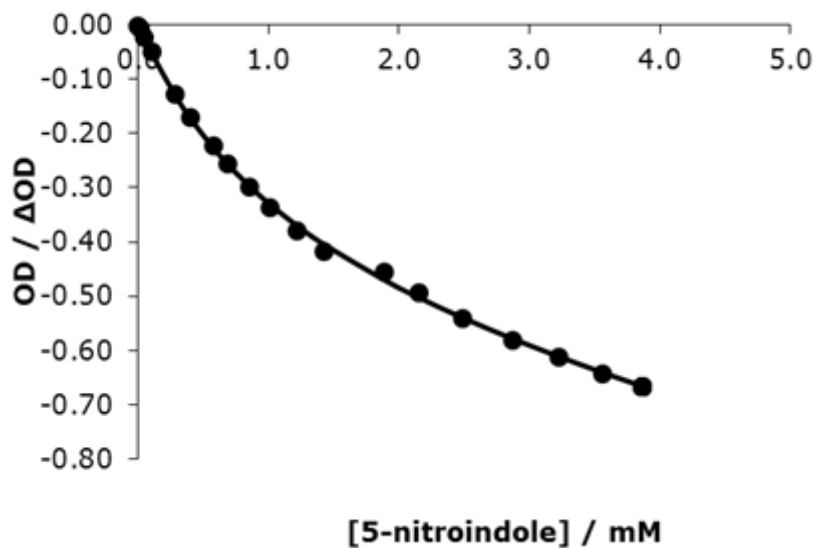

Graph S33. Binding isotherms for titration using 1:1 fitting program for titration of 5-nitroindole against Reichardt's dye in acetone. [Reichardt's dye] = 0.15 mM and [5-nitroindole] = 12 mM,  $\Delta OD = -0.634$ .

$$K_a = 860 \pm 350 \text{ M}^{-1}$$

**79% bound**

c) Titration of Reichardt's dye with phenol in acetone



Host: Reichardt's dye = 0.15 mM

Guest: phenol = 108 mM

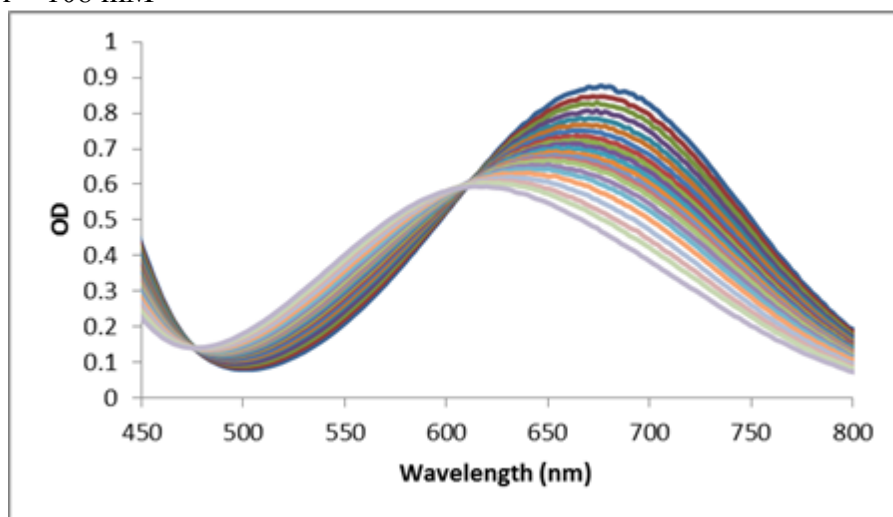

Graph S34. UV/vis spectra of titration of phenol with Reichardt's dye in acetone.

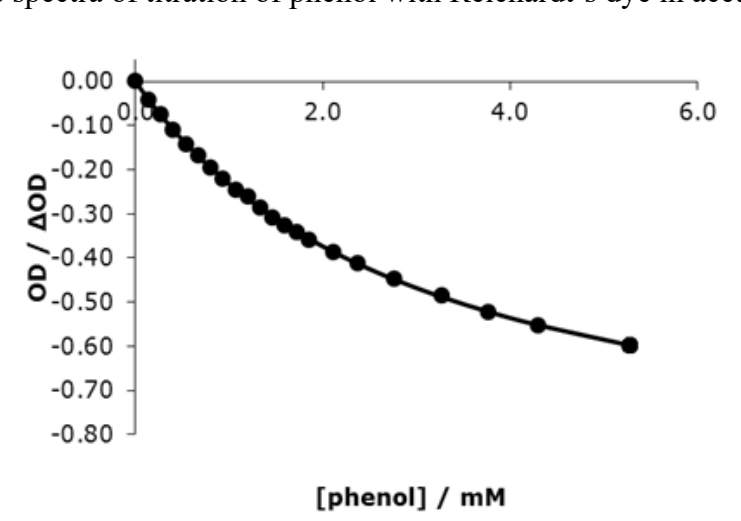

Graph S35. Binding isotherms for titration using 1:1 fitting program for titration of phenol against Reichardt's dye in acetone. [Reichardt's dye] = 0.15 mM and [phenol] = 108 mM,  $\Delta OD = -0.932$

$$K_a = 340 \pm 6 \text{ M}^{-1} \quad 64\% \text{ bound}$$

d) Titration of Reichardt's dye with NaBPh<sub>4</sub> in acetone

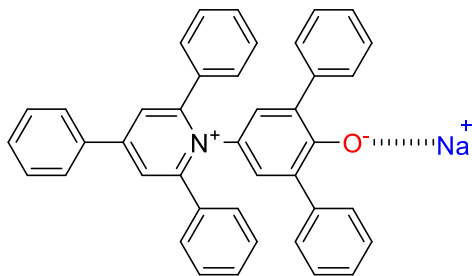

Host: Reichardt's dye = 0.15 mM

Guest: NaBPh<sub>4</sub> = 26 mM

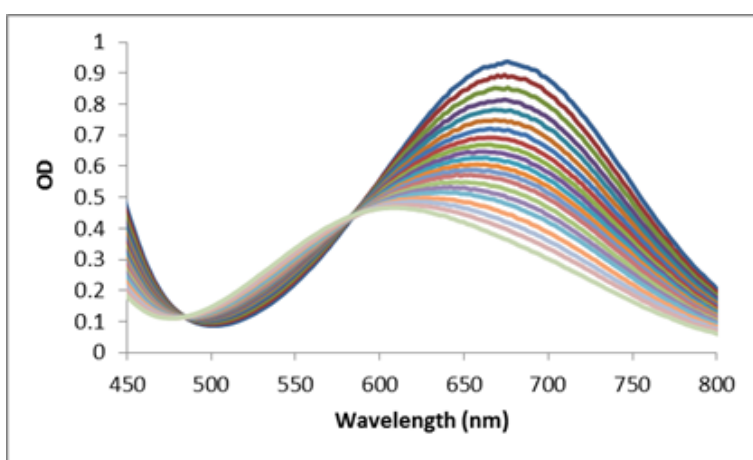

Graph S36. UV/vis spectra of titration of NaBPh<sub>4</sub> with Reichardt's dye in acetone.

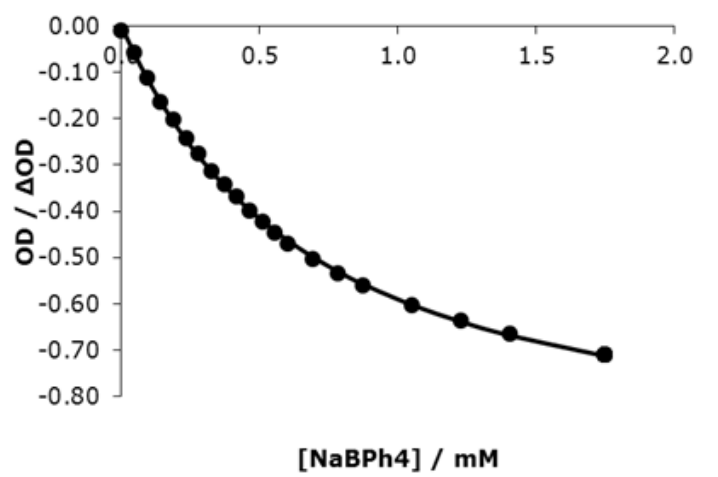

Graph S37. Binding isotherms for titration using 1:1 fitting program for titration of NaBPh<sub>4</sub> against Reichardt's dye in acetone. [Reichardt's dye] = 0.15 mM and [NaBPh<sub>4</sub>] = 26 mM,  $\Delta OD = -0.959$ .

$$K_a = 1700 \pm 160 \text{ M}^{-1}$$

74% bound

e) Titration of Reichardt's dye with RbBPh<sub>4</sub> in acetone

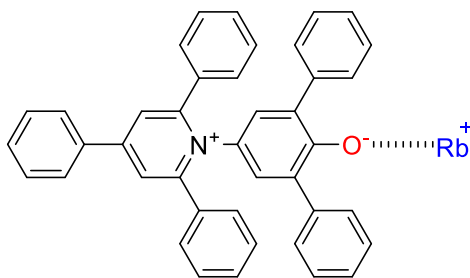

Host: Reichardt's dye = 0.15 mM

Guest: RbBPh<sub>4</sub> = 28 mM

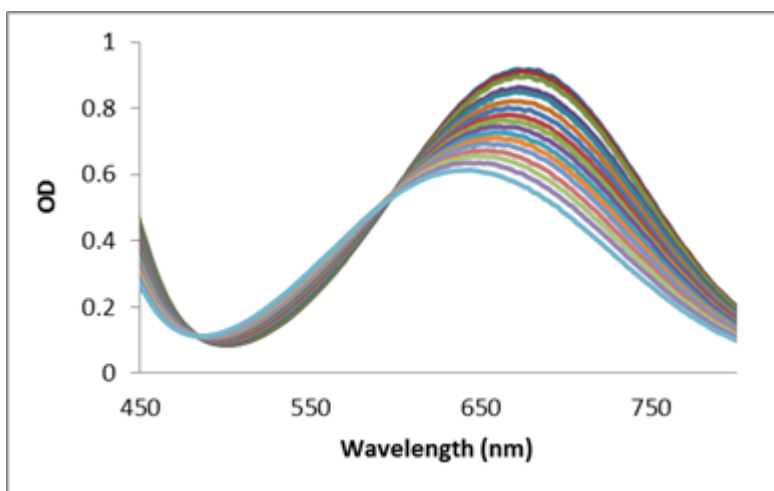

Graph S38. UV/vis spectra of titration of RbBPh<sub>4</sub> with Reichardt's dye in acetone.

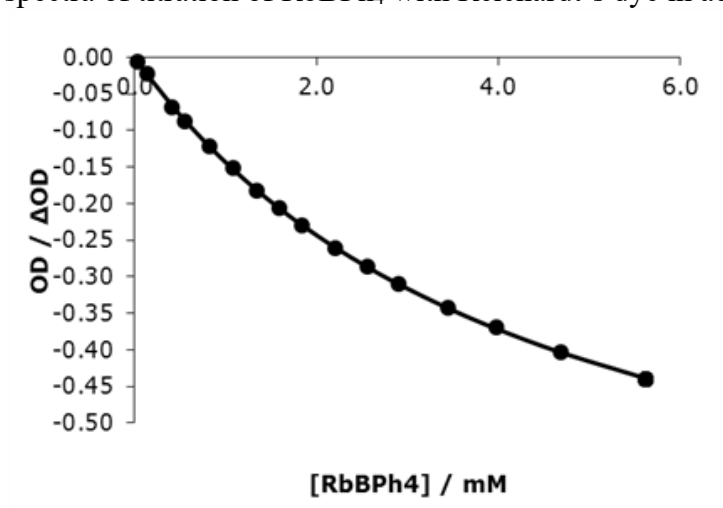

Graph S39. Binding isotherms for titration using 1:1 fitting program for titration of RbBPh<sub>4</sub> against Reichardt's dye in acetone. [Reichardt's dye] = 0.15 mM and [RbBPh<sub>4</sub>] = 28 mM,  $\Delta OD = -0.782$ .

$$K_a = 220 \pm 50 \text{ M}^{-1}$$

56% bound

f) Titration of Reichardt's dye with CsBPh<sub>4</sub> in acetone

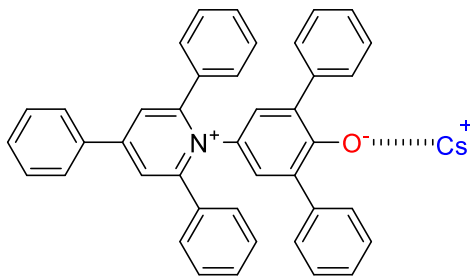

Host: Reichardt's dye = 0.15 mM

Guest: CsBPh<sub>4</sub> = 24 mM

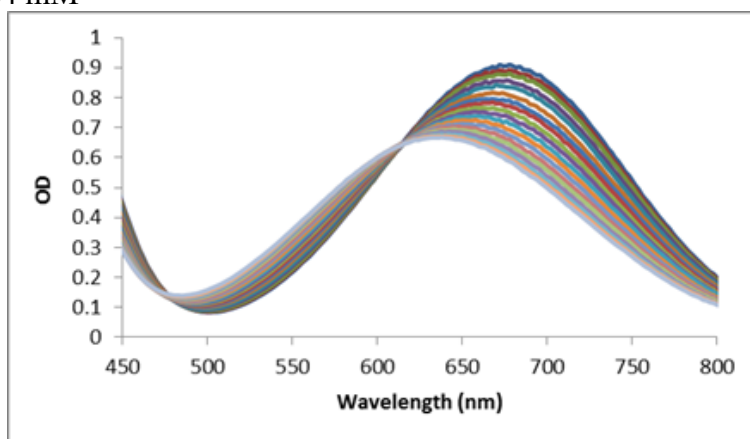

Graph S40. UV/vis spectra of titration of CsBPh<sub>4</sub> with Reichardt's dye in acetone.

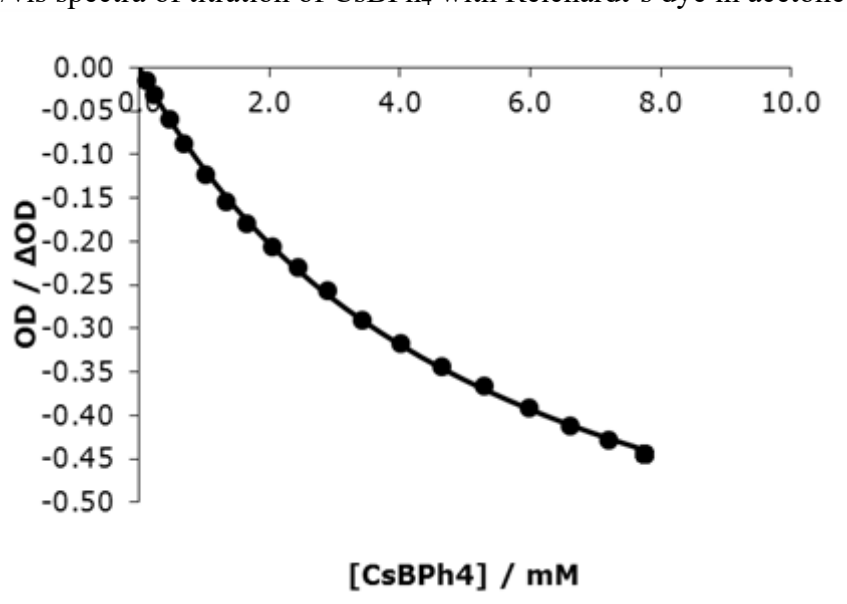

Graph S41. Binding isotherms for titration using 1:1 fitting program for titration of CsBPh<sub>4</sub> against Reichardt's dye in acetone. [Reichardt's dye] = 0.15 mM and [CsBPh<sub>4</sub>] = 24 mM,  $\Delta OD = -0.734$ .

$$K_a = 210 \pm 35 \text{ M}^{-1}$$

60% bound

g) Titration of Reichardt's dye with  $\text{IPh}_2\text{BF}_4$  in acetone

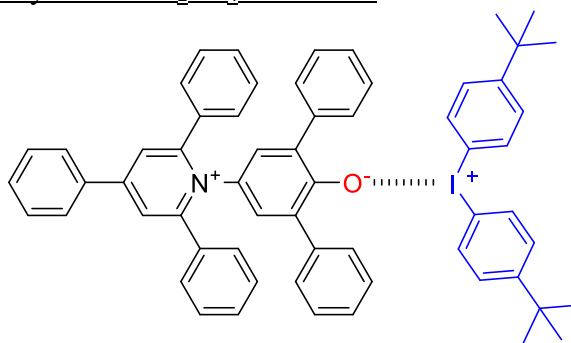

Host: Reichardt's dye = 0.15 mM

Guest:  $\text{IPh}_2\text{BF}_4$  = 11 mM

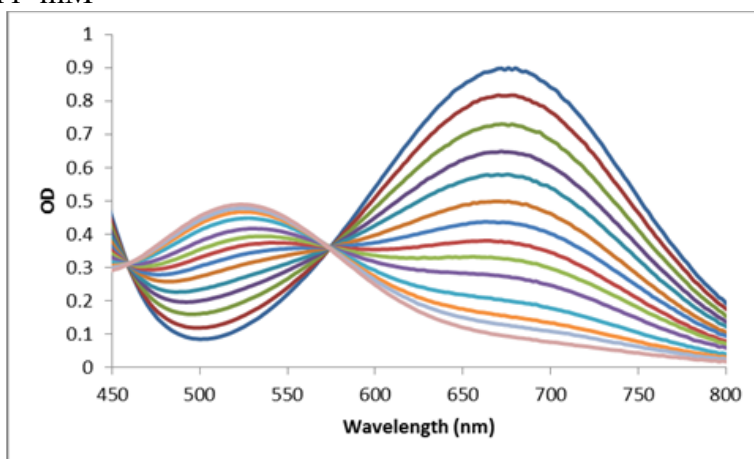

Graph S42. UV/vis spectra of titration of  $\text{IPh}_2\text{BF}_4$  with Reichardt's dye in acetone.

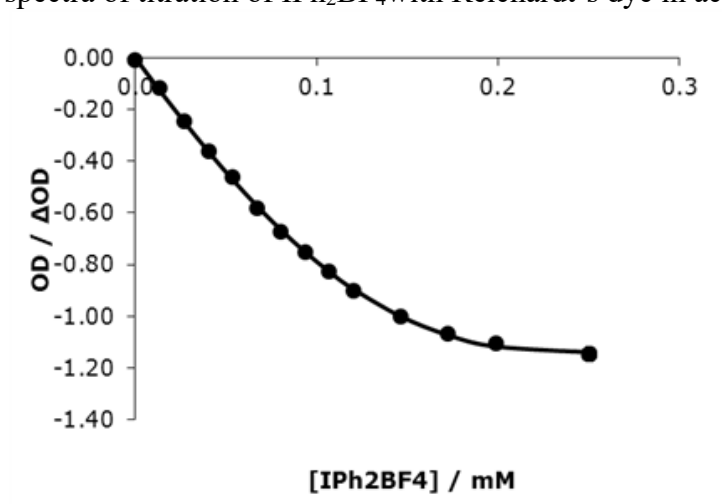

Graph S43. Binding isotherms for titration using 1:1 fitting program for titration of phenol against Reichardt's dye in acetone.  $[\text{Reichardt's dye}] = 0.15 \text{ mM}$  and  $[\text{IPh}_2\text{BF}_4] = 11 \text{ mM}$ ,  $\Delta\text{OD} = -1.777$ .

$$K_a = 48000 \pm 3000 \text{ M}^{-1} \quad 79\% \text{ bound}$$

h) Titration of Reichardt's dye with KBPh<sub>4</sub> in acetone

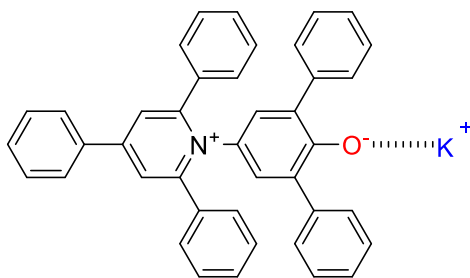

Host: Reichardt's dye = 0.15 mM

Guest: KBPh<sub>4</sub> = 19 mM

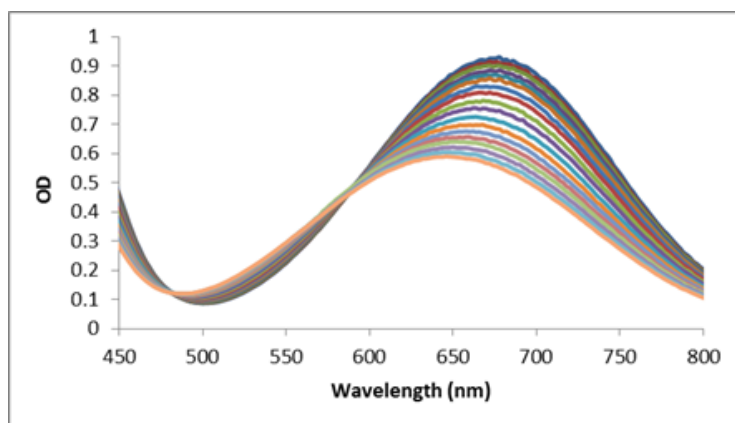

Graph S44. UV/vis spectra of titration of KBPh<sub>4</sub> with Reichardt's dye in acetone.

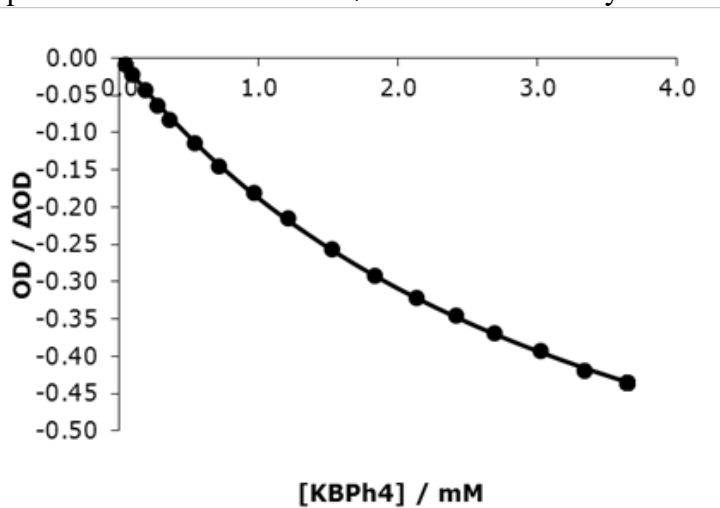

Graph S45. Binding isotherms for titration using 1:1 fitting program for titration of KBPh<sub>4</sub> against Reichardt's dye in acetone. [Reichardt's dye] = 0.15 mM and [KBPh<sub>4</sub>] = 19 mM,  $\Delta OD = -0.846$ .

$$K_a = 270 \pm 75 \text{ M}^{-1}$$

51% bound



i) Titration of Reichardt's dye with 1-butyl-4-methylpyridiniumPF<sub>6</sub> in acetone

Host: Reichardt's dye = 0.15 mM

Guest: 1-butyl-4-methylpyridiniumPF<sub>6</sub> = 252 mM

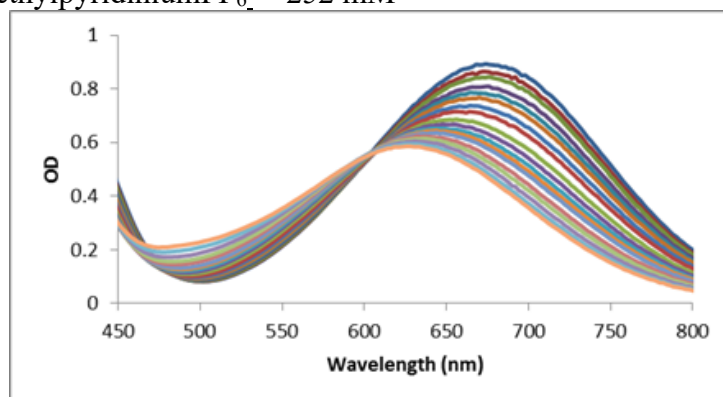

Graph S46. UV/vis spectra of titration of 1-butyl-4-methylpyridiniumPF<sub>6</sub> with Reichardt's dye in acetone.

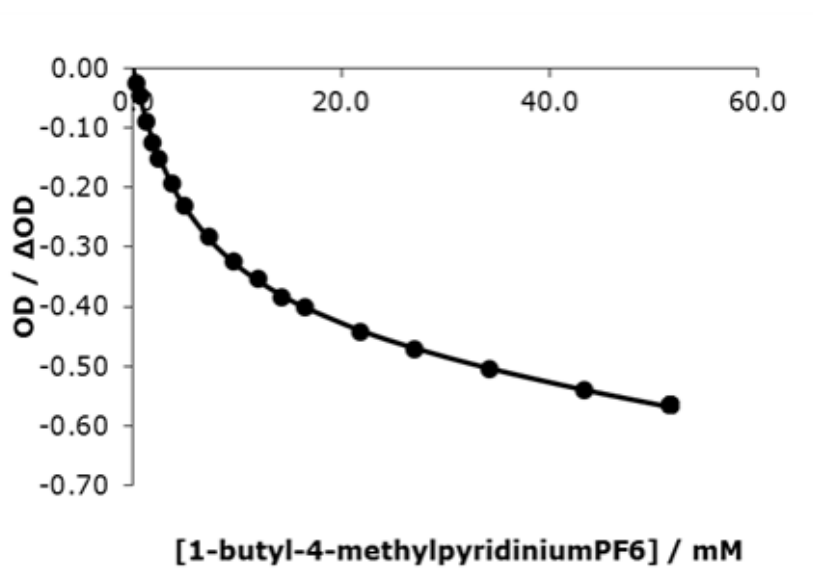

Graph S47. Binding isotherms for titration using 1:1 fitting program for titration of 1-butyl-4-methylpyridiniumPF<sub>6</sub> against Reichardt's dye in acetone. [Reichardt's dye] = 0.15 mM and [1-butyl-4-methylpyridiniumPF<sub>6</sub>] = 252 mM,  $\Delta OD = -0.640$ .

$$K_a = 180 \pm 40 \text{ M}^{-1}$$

**84% bound**

j) Titration of Reichardt's dye with imidazoliumPF<sub>6</sub> in acetone



Host: Reichardt's dye = 0.15 mM

Guest: imidazoliumPF<sub>6</sub> = 144 mM

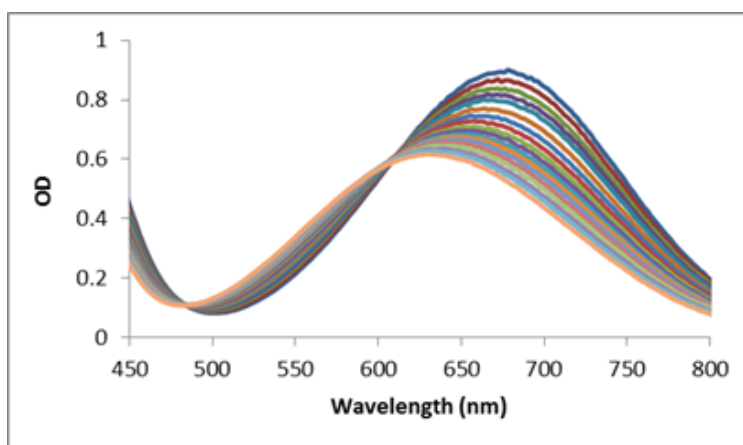

Graph S48. UV/vis spectra of titration of imidazoliumPF<sub>6</sub> with Reichardt's dye in acetone.

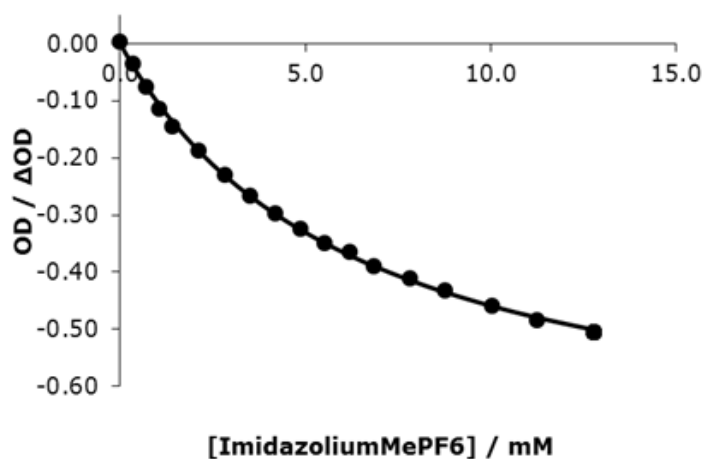

Graph S49. Binding isotherms for titration using 1:1 fitting program for titration of imidazoliumPF<sub>6</sub> against Reichardt's dye in acetone. [Reichardt's dye] = 0.15 mM and [imidazoliumPF<sub>6</sub>] = 144 mM, ΔOD = -0.745.

$$K_a = 200 \pm 60 \text{ M}^{-1}$$

67% bound

k) Titration of Reichardt's dye with  $\text{Bu}_4\text{NBF}_4$  in acetone

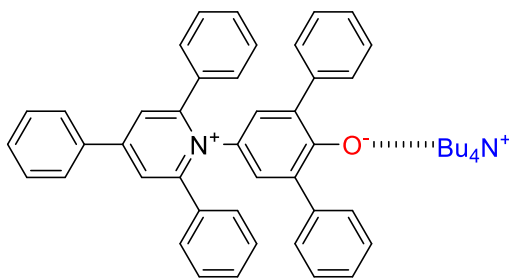

Host: Reichardt's dye = 0.15 mM

Guest:  $\text{Bu}_4\text{NBF}_4$  = 334 mM

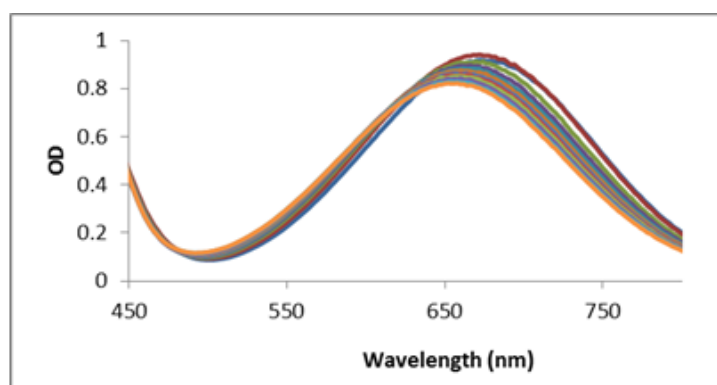

*Graph S50.* UV/vis spectra of titration of  $\text{Bu}_4\text{NBF}_4$  with Reichardt's dye in acetone.

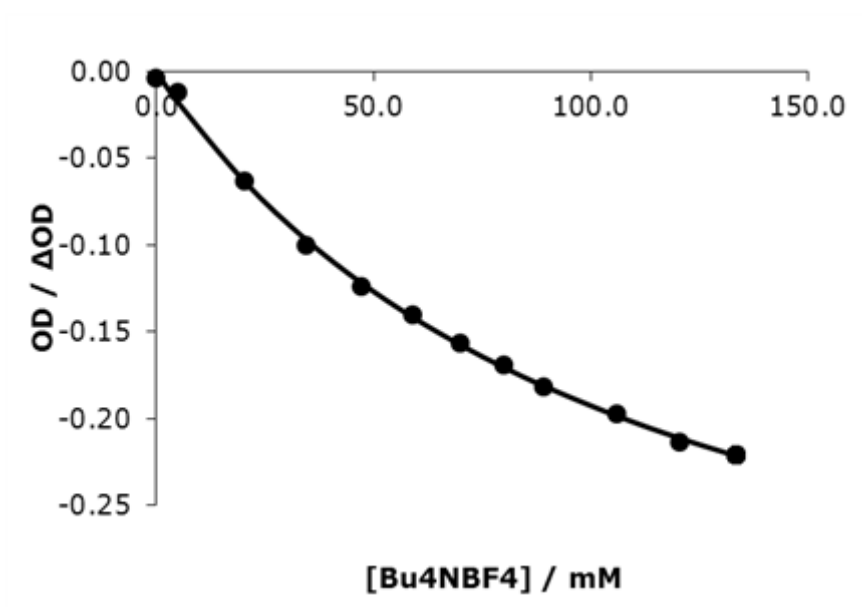

*Graph S51.* Binding isotherms for titration using 1:1 fitting program for titration of  $\text{Bu}_4\text{NBF}_4$  against Reichardt's dye in acetone.  $[\text{Reichardt's dye}] = 0.15 \text{ mM}$  and  $[\text{Bu}_4\text{NBF}_4] = 334 \text{ mM}$ ,  $\Delta\text{OD} = -0.401$ .

$$K_a = 10 \pm 2 \text{ M}^{-1} \quad 55\% \text{ bound}$$

1) Titration of Reichardt's dye with NaBF<sub>4</sub> in acetone

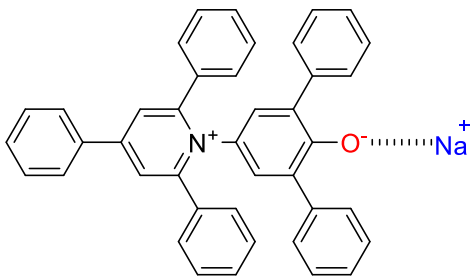

Host: Reichardt's dye = 0.15 mM

Guest: NaBF<sub>4</sub> = 96 mM

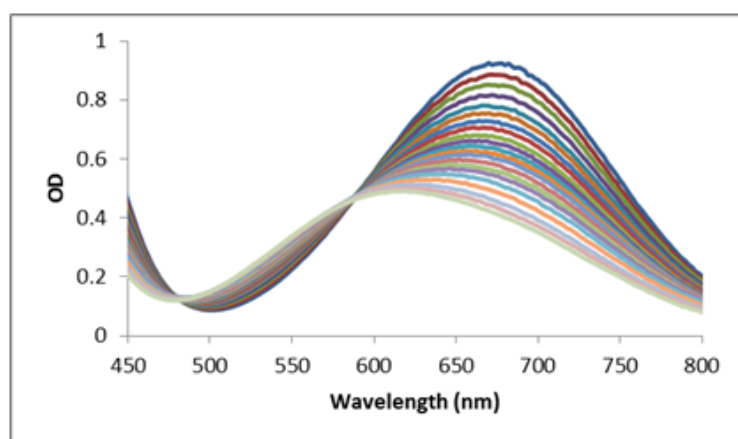

Graph S52. UV/vis spectra of titration of NaBF<sub>4</sub> with Reichardt's dye in acetone.

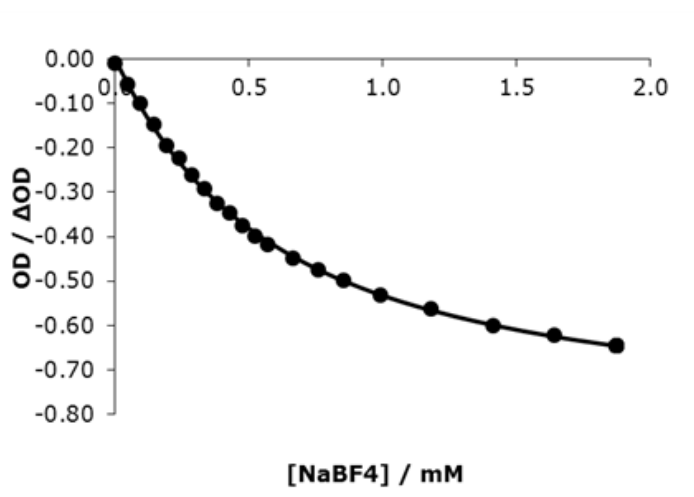

Graph S53. Binding isotherms for titration using 1:1 fitting program for titration of NaBF<sub>4</sub> against Reichardt's dye in acetone. [Reichardt's dye] = 0.15 mM and [NaBF<sub>4</sub>] = 96 mM,  $\Delta OD = -0.834$ .

$$K_a = 1900 \pm 100 \text{ M}^{-1}$$

**77% bound**

m) Titration of Reichardt's dye with NaPF<sub>6</sub> in acetone



Host: Reichardt's dye = 0.15 mM

Guest: NaPF<sub>6</sub> = 59 mM

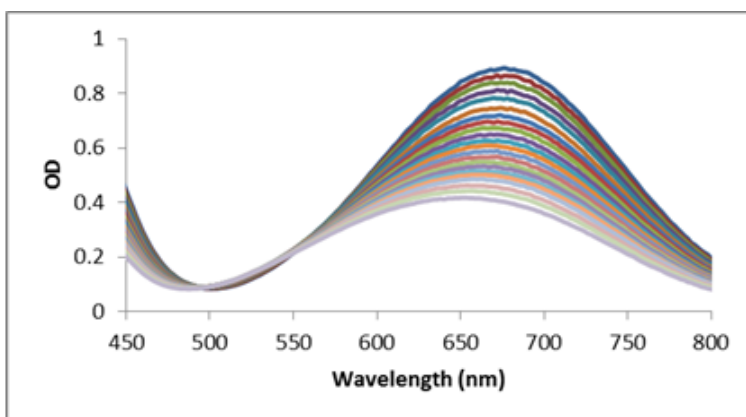

*Graph S54.* UV/vis spectra of titration of NaPF<sub>6</sub> with Reichardt's dye in acetone.

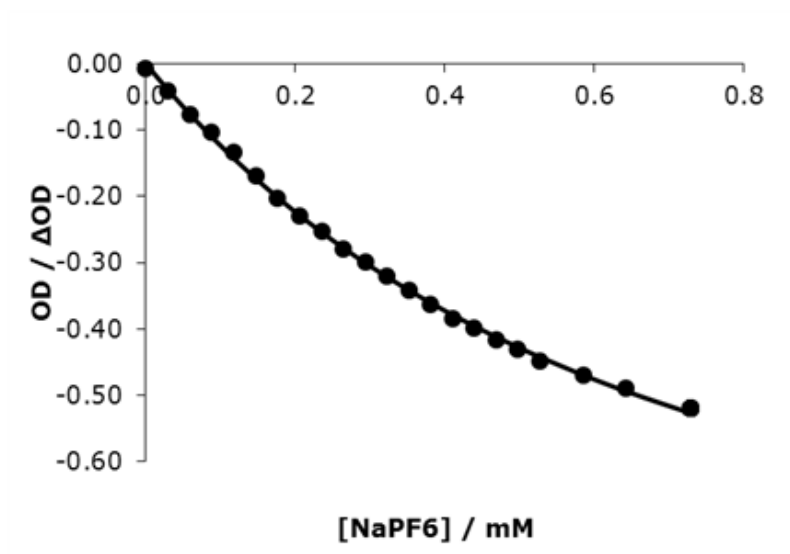

*Graph S55.* Binding isotherms for titration using 1:1 fitting program for titration of NaPF<sub>6</sub> against Reichardt's dye in acetone. [Reichardt's dye] = 0.15 mM and [NaPF<sub>6</sub>] = 59 mM,  $\Delta OD = -0.989$ .

$$K_a = 1700 \pm 140 \text{ M}^{-1}$$

**53% bound**

n) Titration of Reichardt's dye with NaBAr<sup>F</sup> in acetone



Host: Reichardt's dye = 0.15 mM

Guest: NaBAr<sup>F</sup> = 35 mM

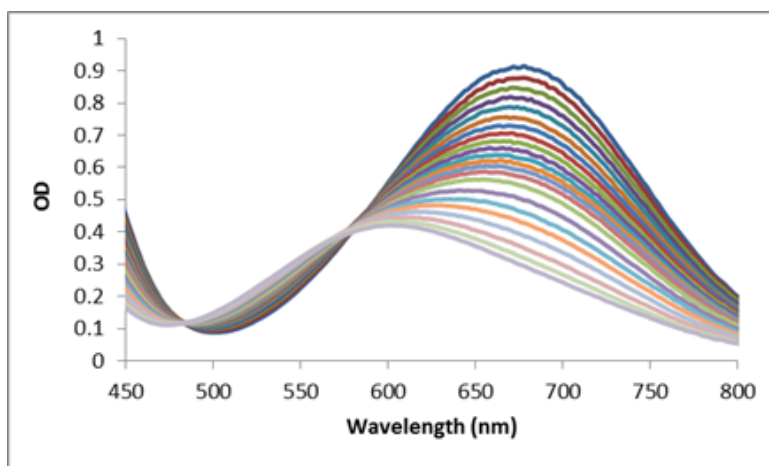

Graph S56. UV/vis spectra of titration of NaBAr<sup>F</sup> with Reichardt's dye in acetone.

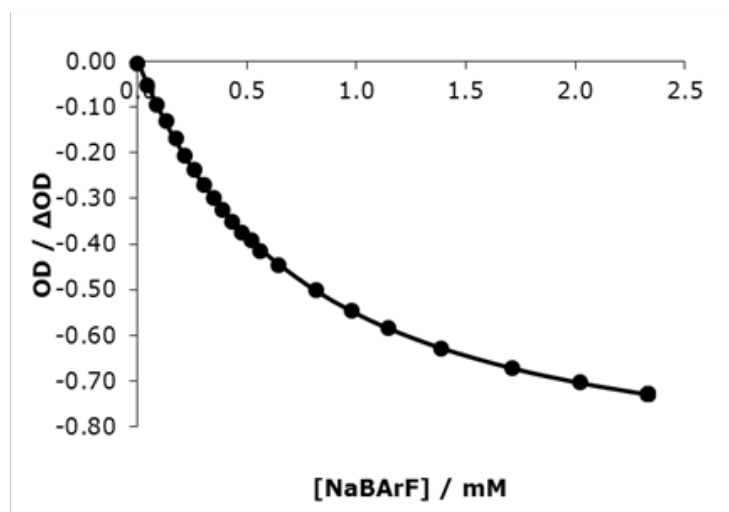

Graph S57. Binding isotherms for titration using 1:1 fitting program for titration of phenol against Reichardt's dye in acetone. [Reichardt's dye] = 0.15 mM and [NaBAr<sup>F</sup>] = 35 mM,  $\Delta OD = -0.943$ .

$$K_a = 1400 \pm 400 \text{ M}^{-1}$$

71% bound

o) Titration of Reichardt's dye with  $\text{NaN}(\text{SO}_2\text{CF}_3)_2$  in acetone



Host: Reichardt's dye = 0.15 mM

Guest:  $\text{NaN}(\text{SO}_2\text{CF}_3)_2$  = 46 mM

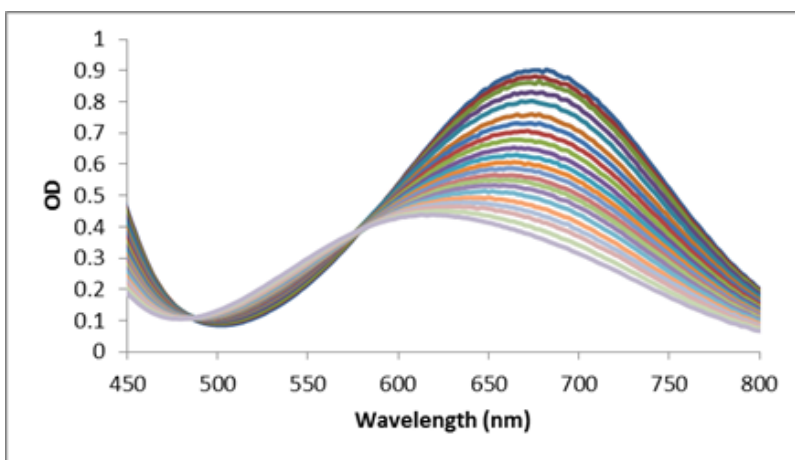

Graph S58. UV/vis spectra of titration of  $\text{NaN}(\text{SO}_2\text{CF}_3)_2$  with Reichardt's dye in acetone.

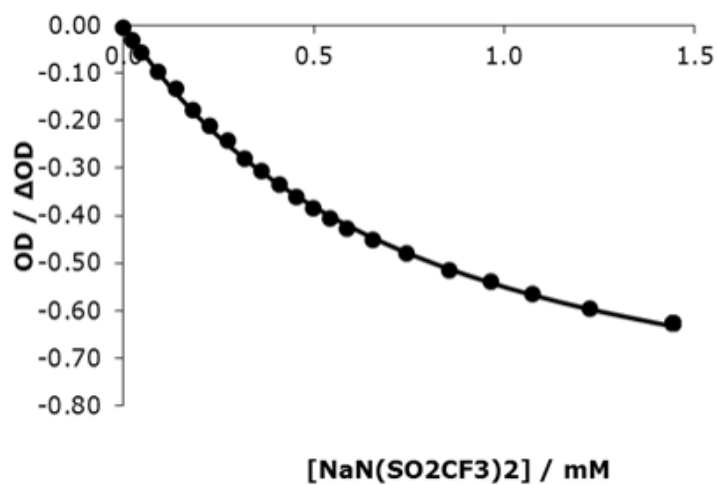

Graph S59. Binding isotherms for titration using 1:1 fitting program for titration of phenol against Reichardt's dye in acetone.  $[\text{Reichardt's dye}] = 0.15 \text{ mM}$  and  $[\text{NaN}(\text{SO}_2\text{CF}_3)_2] = 46 \text{ mM}$ ,  $\Delta\text{OD} = -0.930$ .

$$K_a = 1500 \pm 200 \text{ M}^{-1} \quad 68\% \text{ bound}$$

p) Titration of Reichardt's dye with NaI in acetone

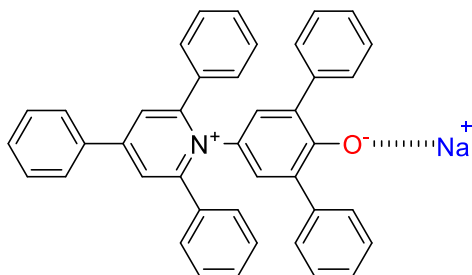

Host: Reichardt's dye = 0.17 mM

Guest: NaI = 184 mM

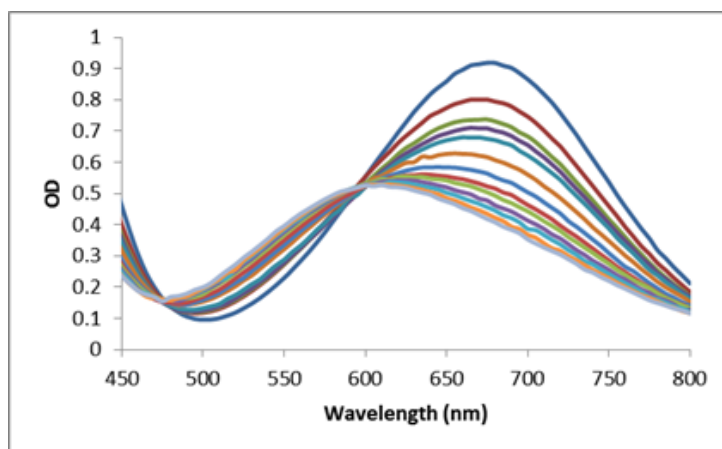

Graph S60. UV/vis spectra of titration of NaI with Reichardt's dye in acetone.

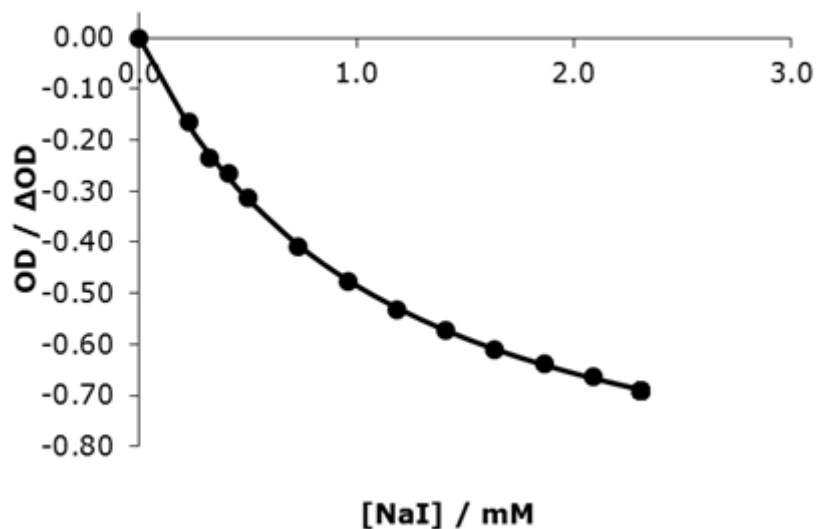

Graph S61. Binding isotherms for titration using 1:1 fitting program for titration of NaI against Reichardt's dye in acetone. [Reichardt's dye] = 0.17 mM and [NaI] = 183 mM,  $\Delta OD = -0.987$ .

$$K_a = 1000 \pm 300 \text{ M}^{-1} \quad 70\% \text{ bound}$$



q) Titration of Reichardt's dye with TFA in acetone



Host: Reichardt's dye = 0.21 mM

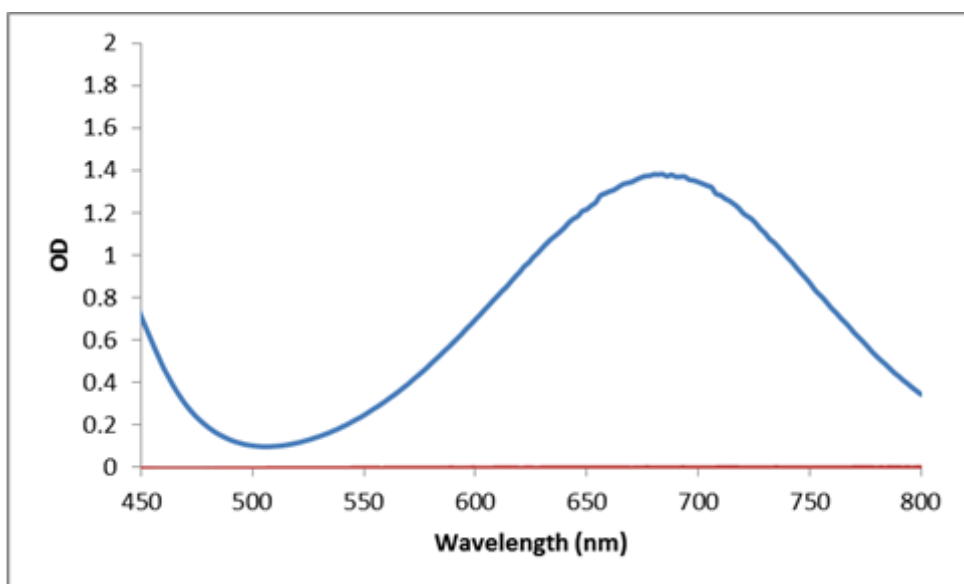

*Graph S62.* UV/vis spectra of Reichardt's dye when treated with 100  $\mu$ L of TFA in acetonitrile.

#### 4. Titration Curves for Reichardt's dye (1) in Acetonitrile with 0.1% H<sub>2</sub>O added

##### a) Titration of Reichardt's dye with phenol in acetonitrile + 0.1% H<sub>2</sub>O added

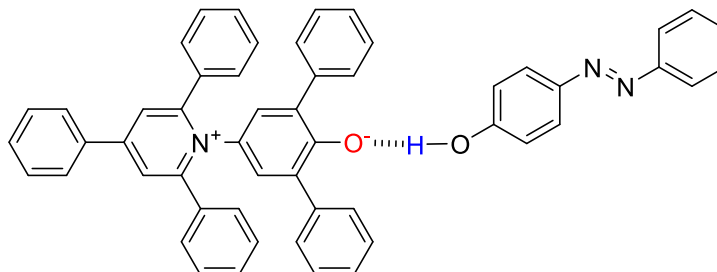

Host: Reichardt's dye = 0.21 mM

Guest: 4-phenylazophenol = 18 mM

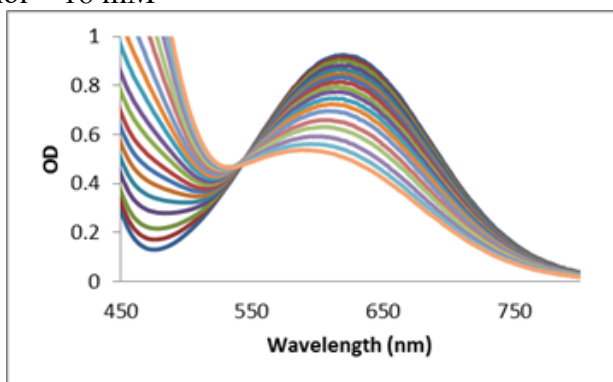

Graph S63. UV/vis spectra of titration of Reichardt's dye with 4-phenylazophenol in acetonitrile with 0.1% H<sub>2</sub>O added.

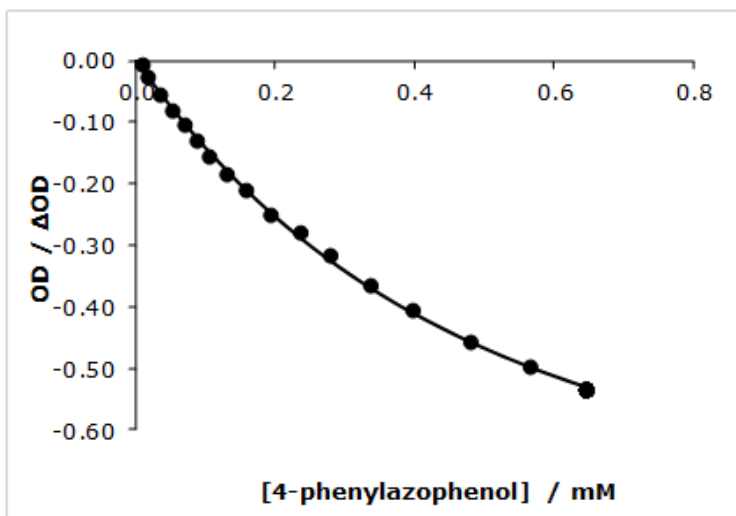

Graph S64. Binding isotherms for titration using 1:1 and accounting for a non-specific secondary interaction fitting program for titration of 4-phenylazophenol against Reichardt's dye in acetonitrile with 0.1% H<sub>2</sub>O added. [Reichardt's dye] = 0.21 mM and [4-phenylazophenol] = 18 mM,  $\Delta OD = -0.887$ .

$$K_a = 2700 \pm 560 \text{ M}^{-1}$$

60% bound

b) Titration of Reichardt's dye with guanidinium.BPh<sub>4</sub> in acetonitrile with 0.1% H<sub>2</sub>O added

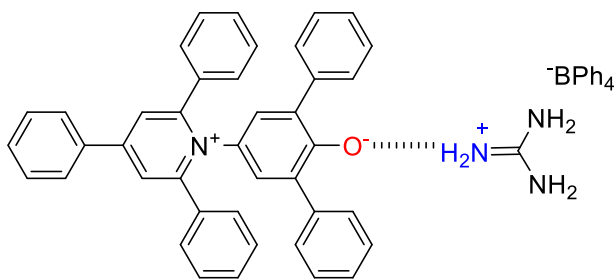

Host: Reichardt's dye = 0.21 mM

Guest: guanidinium.BPh<sub>4</sub> = 45 mM

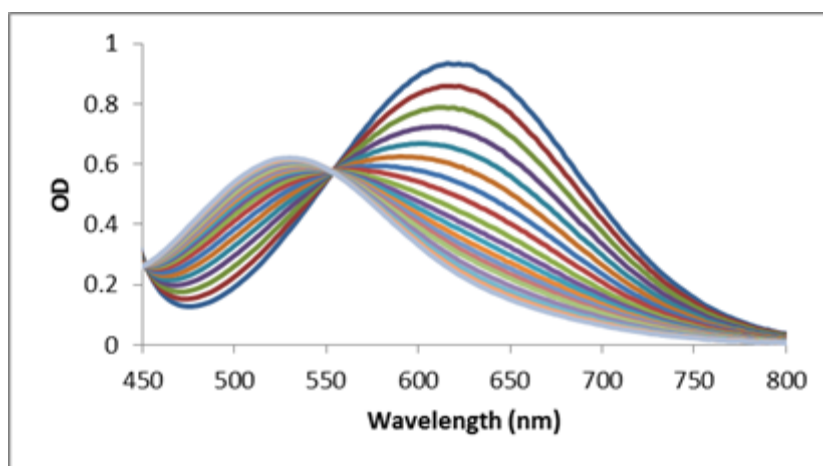

Graph S65. UV/vis spectra of titration of guanidinium.BPh<sub>4</sub> with Reichardt's dye in acetonitrile with 0.1% H<sub>2</sub>O added.

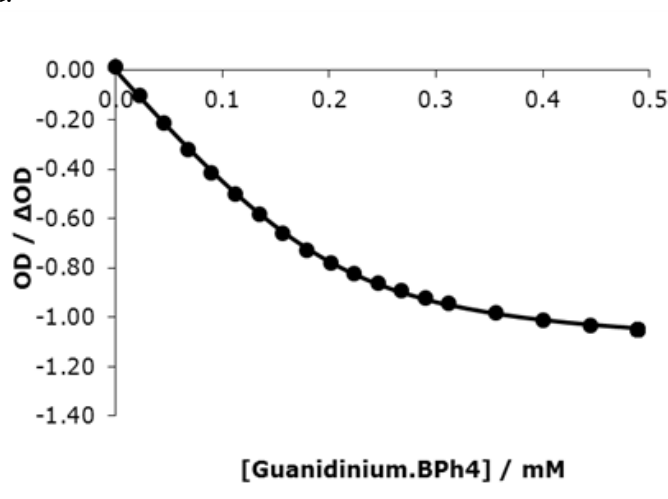

Graph S66. Binding isotherms for titration using 1:1 fitting program for titration of phenol against Reichardt's dye in acetonitrile with 0.1% H<sub>2</sub>O added. [Reichardt's dye] = 0.21 mM and [guanidinium.BPh<sub>4</sub>] = 45 mM, ΔOD = -1.143.

$$K_a = 34000 \pm 3800 \text{ M}^{-1} \quad 91\% \text{ bound}$$

c) Titration of Reichardt's dye with  $\text{NaN}(\text{SO}_2\text{CF}_3)_2$  in acetonitrile with 0.1%  $\text{H}_2\text{O}$  added

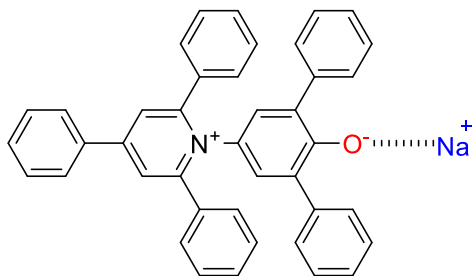

Host: Reichardt's dye = 0.21 mM

Guest:  $\text{NaN}(\text{SO}_2\text{CF}_3)_2$  = 84 mM

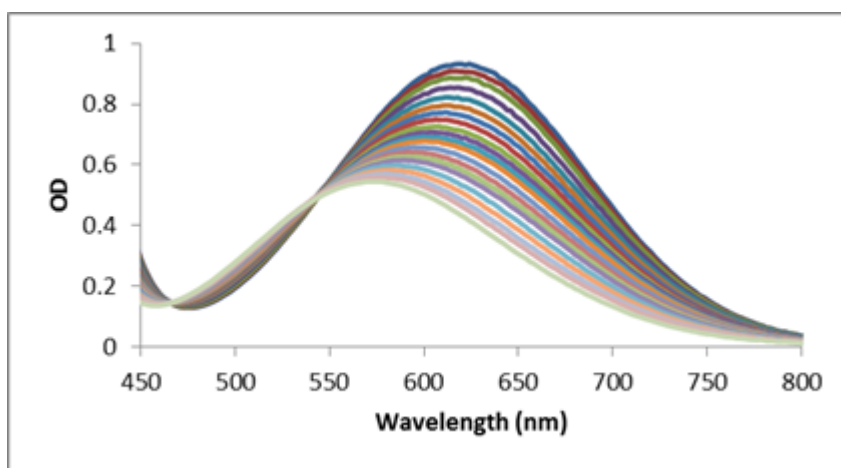

Graph S67. UV/vis spectra of titration of  $\text{NaN}(\text{SO}_2\text{CF}_3)_2$  with Reichardt's dye in acetonitrile with 0.1%  $\text{H}_2\text{O}$  added.

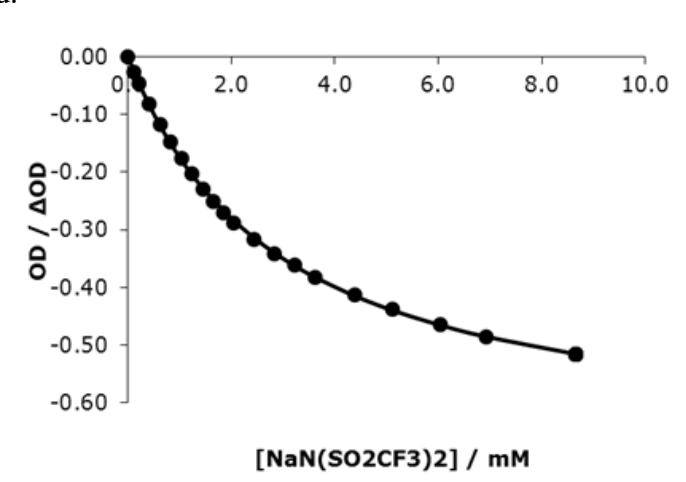

Graph S68. Binding isotherms for titration using 1:1 fitting program for titration of phenol against Reichardt's dye in acetonitrile with 0.1%  $\text{H}_2\text{O}$  added. [Reichardt's dye] = 0.21 mM and  $[\text{NaN}(\text{SO}_2\text{CF}_3)_2]$  = 84 mM,  $\Delta\text{OD}$  = -0.684.

$$K_a = 380 \pm 38 \text{ M}^{-1}$$

75% bound

## 5. Titration Curves for Reichardt's dye (1) in Acetonitrile with 0.25% H<sub>2</sub>O added

### a) Titration of Reichardt's dye with phenol in acetonitrile + 0.25% H<sub>2</sub>O added

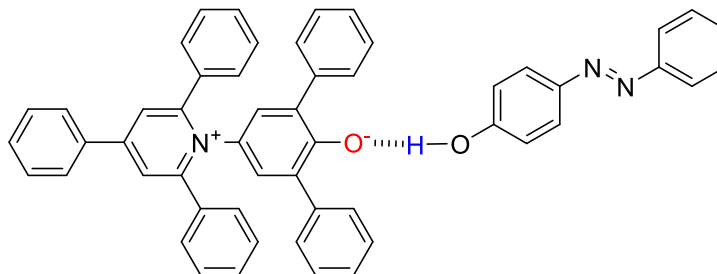

Host: Reichardt's dye = 0.24 mM

Guest: 4-phenylazophenol = 24 mM

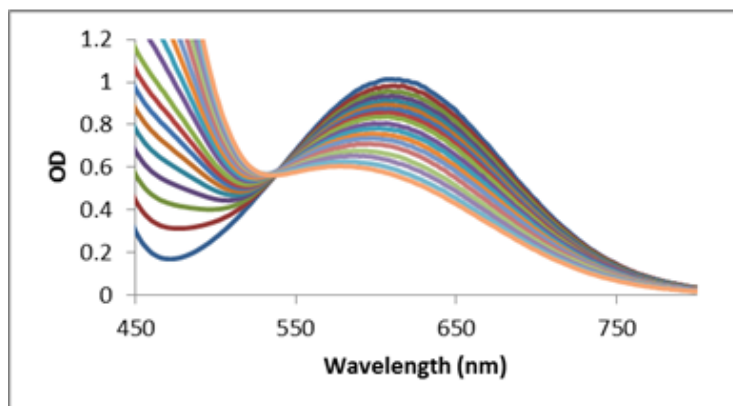

*Graph S69.* UV/vis spectra of titration of Reichardt's dye with 4-phenylazophenol in acetonitrile with 0.25% H<sub>2</sub>O added.

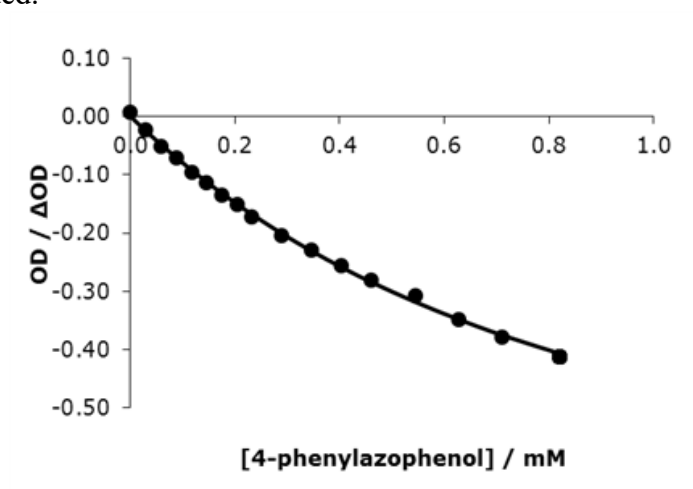

*Graph S70.* Binding isotherms for titration using 1:1 and accounting for a non-specific secondary interaction fitting program for titration of 4-phenylazophenol against Reichardt's dye in acetonitrile with 0.25% H<sub>2</sub>O added. [Reichardt's dye] = 0.24 mM and [4-phenylazophenol] = 24 mM,  $\Delta OD = -0.816$ .

$$K_a = 1600 \pm 380 \text{ M}^{-1}$$

**50% bound**

b) Titration of Reichardt's dye with guanidinium.BPh<sub>4</sub> in acetonitrile with 0.25% H<sub>2</sub>O added



Host: Reichardt's dye = 0.24 mM

Guest: guanidinium.BPh<sub>4</sub> = 49 mM

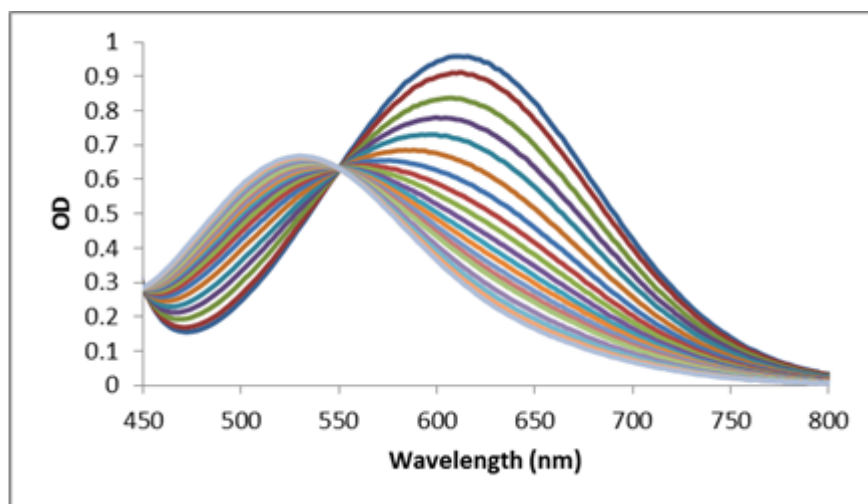

*Graph S71.* UV/vis spectra of titration of guanidinium.BPh<sub>4</sub> with Reichardt's dye in acetonitrile with 0.25% H<sub>2</sub>O added.

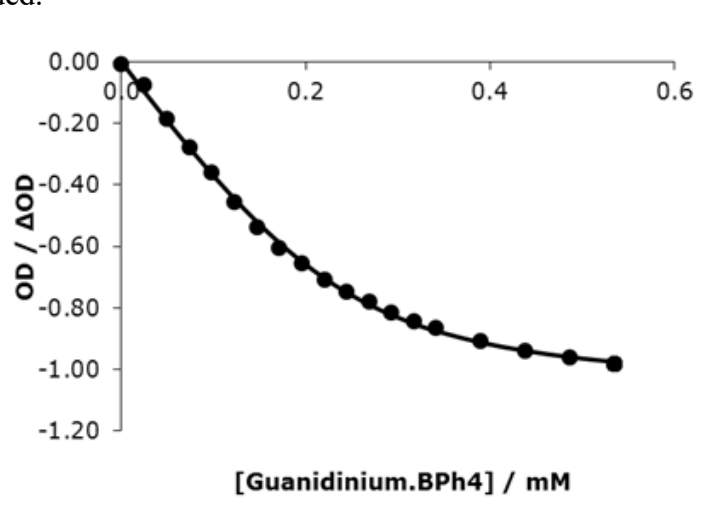

*Graph S72.* Binding isotherms for titration using 1:1 fitting program for titration of guanidinium.BPh<sub>4</sub> against Reichardt's dye in acetonitrile with 0.25% H<sub>2</sub>O added. [Reichardt's dye] = 0.24 mM and [guanidinium.BPh<sub>4</sub>] = 49 mM, ΔOD = -1.083.

$$K_a = 27000 \pm 2000 \text{ M}^{-1} \quad 90\% \text{ bound}$$

c) Titration of Reichardt's dye with  $\text{NaN}(\text{SO}_2\text{CF}_3)_2$  in acetonitrile with 0.25%  $\text{H}_2\text{O}$  added



Host: Reichardt's dye = 0.24 mM

Guest:  $\text{NaN}(\text{SO}_2\text{CF}_3)_2$  = 70 mM

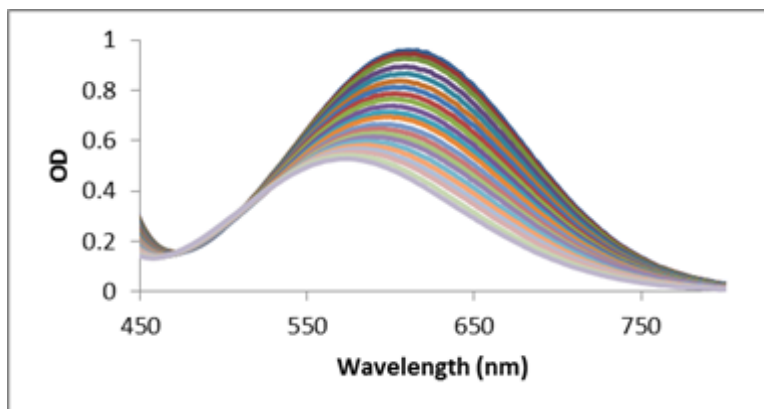

Graph S73. UV/vis spectra of titration of  $\text{NaN}(\text{SO}_2\text{CF}_3)_2$  with Reichardt's dye in acetonitrile with 0.25%  $\text{H}_2\text{O}$  added.

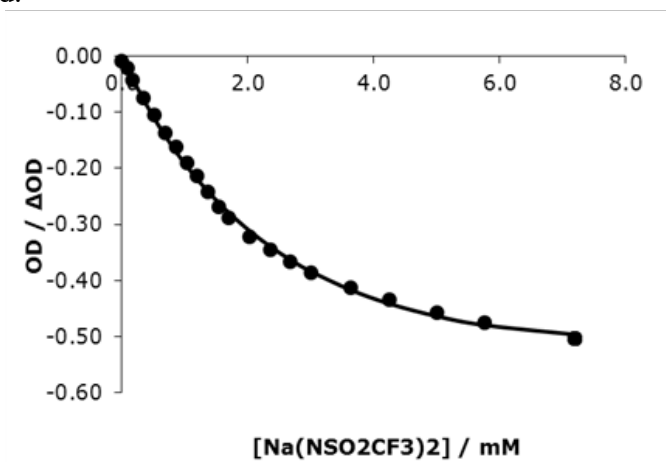

Graph S74. Binding isotherms for titration using 1:1 fitting program and accounting for a second weaker interaction for titration of  $\text{NaN}(\text{SO}_2\text{CF}_3)_2$  against Reichardt's dye in acetonitrile with 0.25%  $\text{H}_2\text{O}$  added.  $[\text{Reichardt's dye}] = 0.24 \text{ mM}$  and  $[\text{NaN}(\text{SO}_2\text{CF}_3)_2] = 70 \text{ mM}$ ,

$$K_a = 290 \pm 18 \text{ M}^{-1}$$

75% bound

## 6. Titration Curves for Reichardt's dye (1) in Acetonitrile with 0.5 % H<sub>2</sub>O added

### a) Titration of Reichardt's dye with phenol in acetonitrile + 0.5% H<sub>2</sub>O added



Host: Reichardt's dye = 0.24 mM

Guest: 4-phenylazophenol = 24 mM

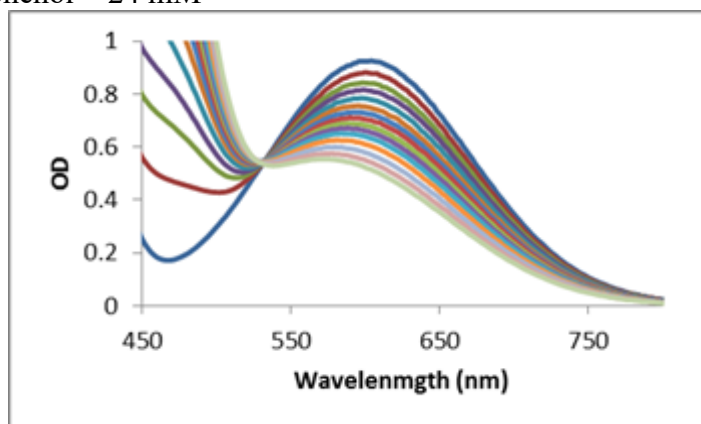

*Graph S75.* UV/vis spectra of titration of Reichardt's dye with 4-phenylazophenol in acetonitrile with 0.5% H<sub>2</sub>O added.

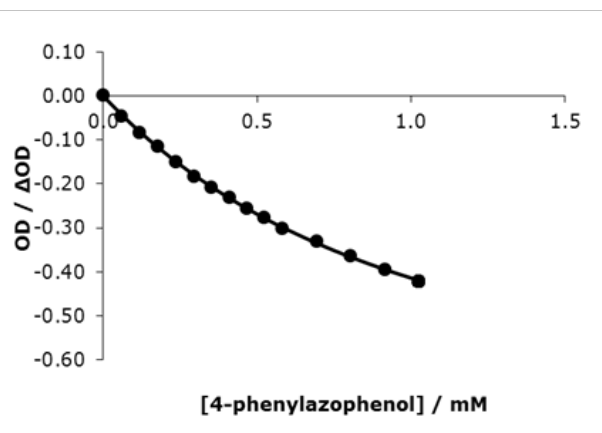

*Graph S76.* Binding isotherms for titration using 1:1 and accounting for a non-specific secondary interaction fitting program for titration of 4-phenylazophenol against Reichardt's dye in acetonitrile with 0.5% H<sub>2</sub>O added. [Reichardt's dye] = 0.24 mM and [4-phenylazophenol] = 24 mM,  $\Delta OD = -0.823$ .

$$K_a = 1100 \pm 180 \text{ M}^{-1} \quad \quad \quad 51\% \text{ bound}$$



b) Titration of Reichardt's dye with guanidinium.BPh<sub>4</sub> in acetonitrile with 0.5% H<sub>2</sub>O added



Host: Reichardt's dye = 0.24 mM

Guest: guanidinium.BPh<sub>4</sub> = 41 mM

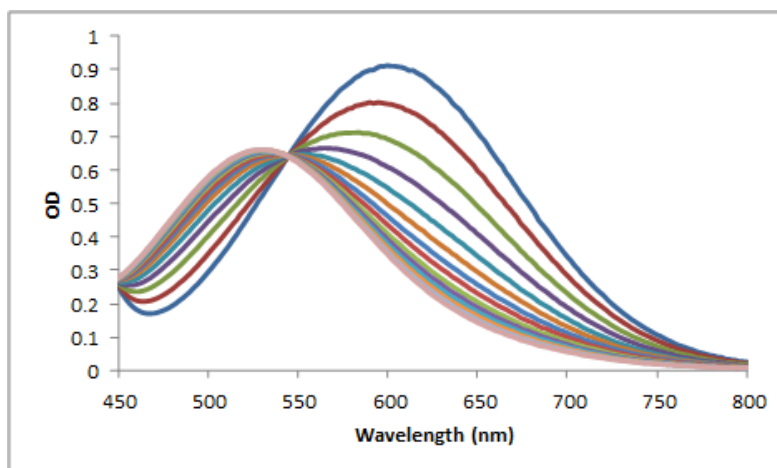

Graph S77. UV/vis spectra of titration of guanidinium.BPh<sub>4</sub> with Reichardt's dye in acetonitrile with 0.5% H<sub>2</sub>O added.

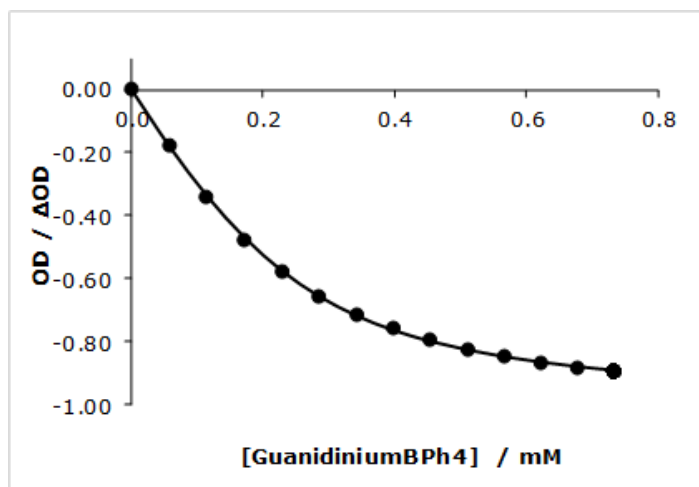

Graph S78. Binding isotherms for titration using 1:1 fitting program for titration of phenol against Reichardt's dye in acetonitrile with 0.5% H<sub>2</sub>O added. [Reichardt's dye] = 0.24 mM and [guanidinium.BPh<sub>4</sub>] = 41 mM, ΔOD = -1.011.

$$K_a = 12600 \pm 4200 \text{ M}^{-1}$$

88% bound

c) Titration of Reichardt's dye with  $\text{NaN}(\text{SO}_2\text{CF}_3)_2$  in acetonitrile with 0.5%  $\text{H}_2\text{O}$  added



Host: Reichardt's dye = 0.24 mM

Guest:  $\text{NaN}(\text{SO}_2\text{CF}_3)_2$  = 68 mM

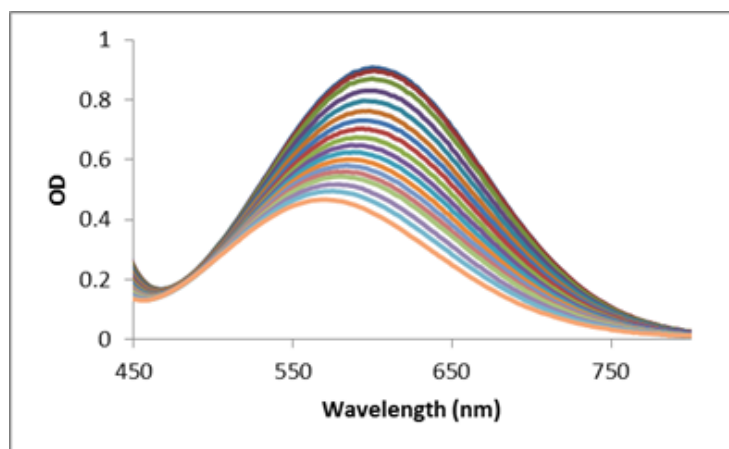

*Graph S79.* UV/vis spectra of titration of  $\text{NaN}(\text{SO}_2\text{CF}_3)_2$  with Reichardt's dye in acetonitrile with 0.5%  $\text{H}_2\text{O}$  added.

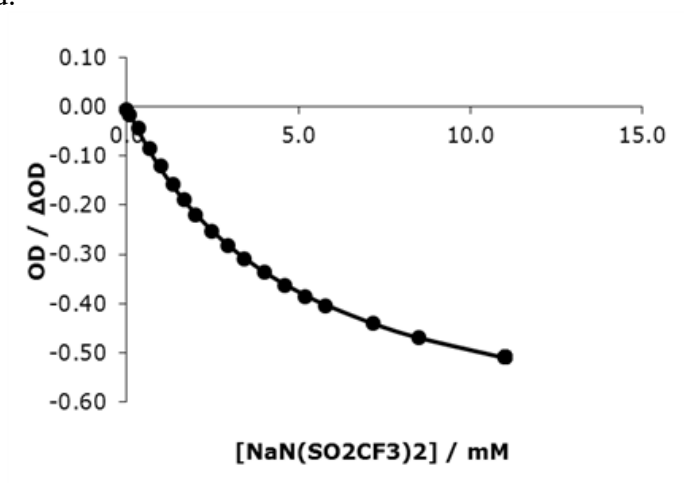

*Graph S80.* Binding isotherms for titration using 1:1 fitting program for titration of phenol against Reichardt's dye in acetonitrile with 0.5%  $\text{H}_2\text{O}$  added.  $[\text{Reichardt's dye}] = 0.24 \text{ mM}$  and  $[\text{NaN}(\text{SO}_2\text{CF}_3)_2] = 68 \text{ mM}$ ,  $\Delta\text{OD} = -0.721$ .

$$K_a = 250 \pm 60 \text{ M}^{-1}$$

**71% bound**

## 7. Titration Curves for Reichardt's dye (1) in Acetonitrile with 1.0 % H<sub>2</sub>O added

### a) Titration of Reichardt's dye with phenol in acetonitrile + 1.0% H<sub>2</sub>O added

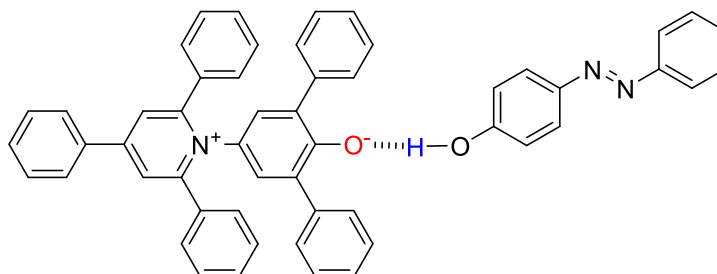

Host: Reichardt's dye = 0.26 mM

Guest: 4-phenylazophenol = 22 mM

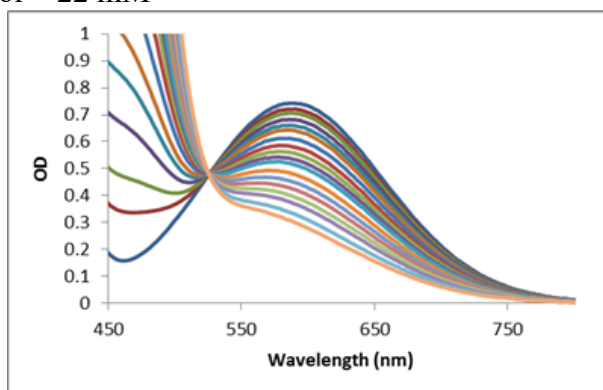

*Graph S81.* UV/vis spectra of titration of Reichardt's dye with 4-phenylazophenol in acetonitrile with 1% H<sub>2</sub>O added.

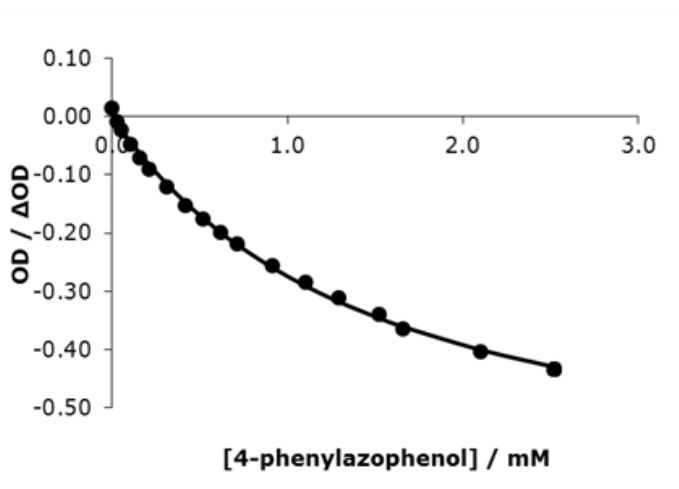

*Graph S82.* Binding isotherms for titration using 1:1 and accounting for a non-specific secondary interaction fitting program for titration of 4-phenylazophenol against Reichardt's dye in acetonitrile with 1% H<sub>2</sub>O added. [Reichardt's dye] = 0.26 mM and [4-phenylazophenol] = 22 mM,  $\Delta OD = -0.659$ .

$$K_a = 800 \pm 20 \text{ M}^{-1}$$

**65% bound**

b) Titration of Reichardt's dye with guanidinium.BPh<sub>4</sub> in acetonitrile with 1% H<sub>2</sub>O added

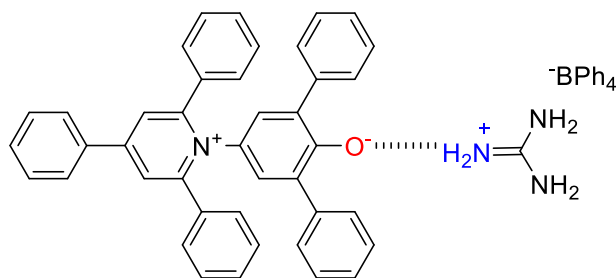

Host: Reichardt's dye = 0.26 mM

Guest: guanidinium.BPh<sub>4</sub> = 27 mM

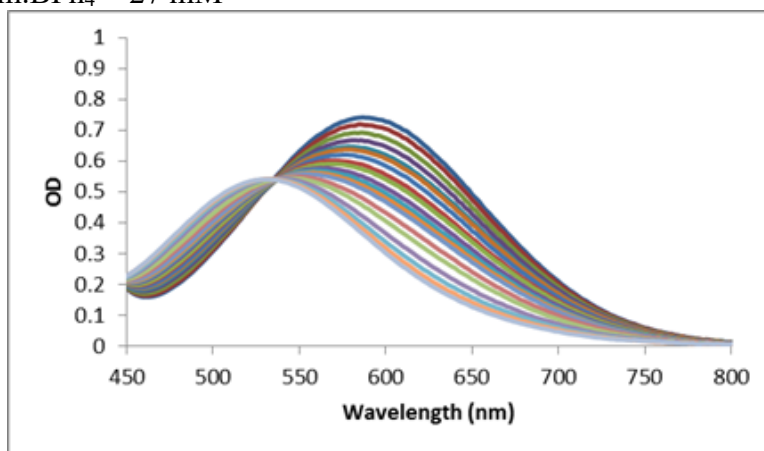

*Graph S83.* UV/vis spectra of titration of guanidinium.BPh<sub>4</sub> with Reichardt's dye in acetonitrile with 1% H<sub>2</sub>O added.

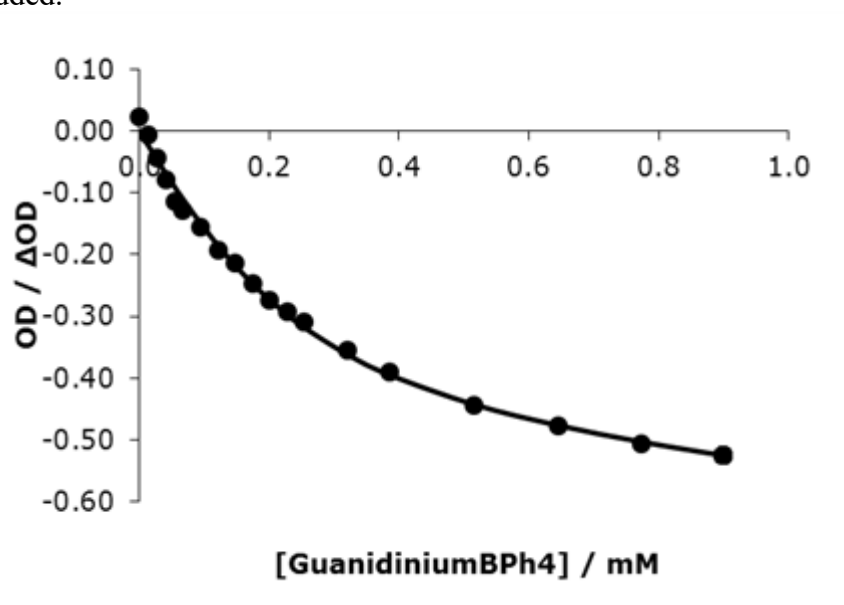

*Graph S84.* Binding isotherms for titration using 1:1 fitting program for titration of phenol against Reichardt's dye in acetonitrile with 1% H<sub>2</sub>O added. [Reichardt's dye] = 0.26 mM and [guanidinium.BPh<sub>4</sub>] = 27 mM,  $\Delta OD = -0.519$ .

$$K_a = 11000 \pm 2000 \text{ M}^{-1} \quad 89\% \text{ bound}$$

## 8. Titration Curves for Reichardt's dye (1) in Acetone with 0.1 % H<sub>2</sub>O added

### a) Titration of Reichardt's dye with phenol in acetone + 0.1% H<sub>2</sub>O added

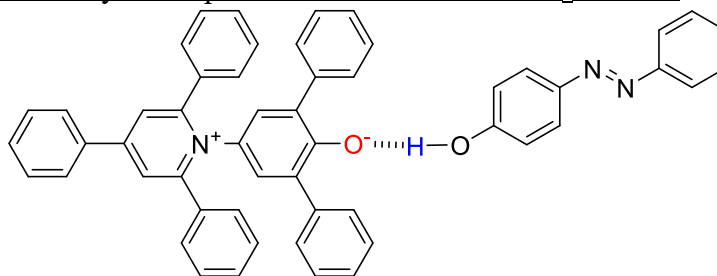

Host: Reichardt's dye = 0.16 mM

Guest: 4-phenylazophenol = 22 mM

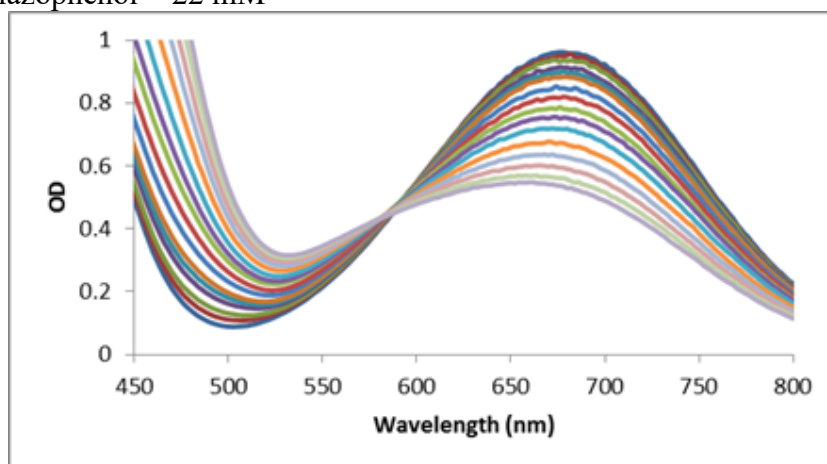

Graph S85. UV/vis spectra of titration of Reichardt's dye with 4-phenylazophenol in acetone with 0.1% H<sub>2</sub>O added.

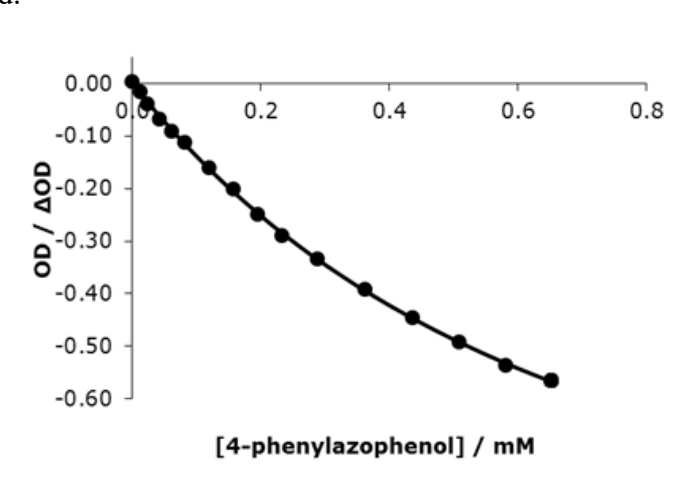

Graph S86. Binding isotherms for titration using 1:1 and accounting for a non-specific secondary interaction fitting program for titration of 4-phenylazophenol against Reichardt's in acetone with 0.1% H<sub>2</sub>O added. [Reichardt's dye] = 0.16 mM and [4-phenylazophenol] = 22 mM,  $\Delta OD = -0.946$ .

$$K_a = 1800 \pm 280 \text{ M}^{-1}$$

67% bound

b) Titration of Reichardt's dye with KBPh<sub>4</sub> in acetone + 0.1 % H<sub>2</sub>O



Host: Reichardt's dye = 0.15 mM

Guest: KBPh<sub>4</sub> = 34 mM

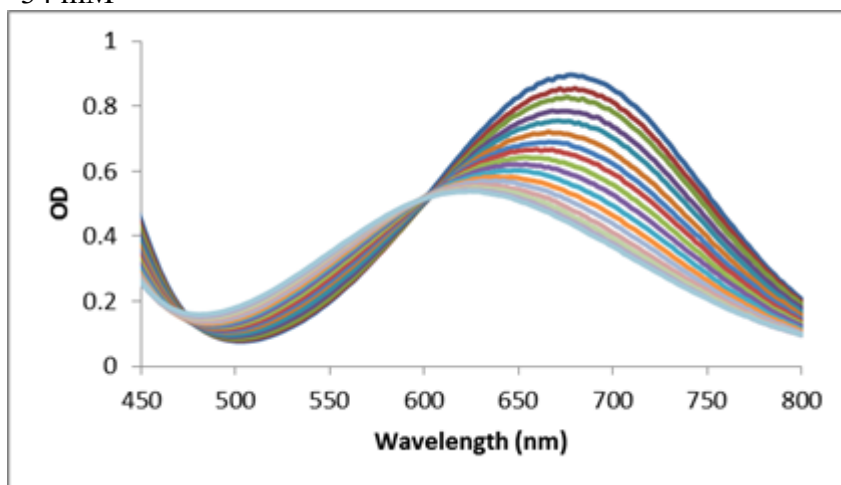

Graph S87. UV/vis spectra of titration of KBPh<sub>4</sub> with Reichardt's dye in acetone + 0.1% H<sub>2</sub>O.

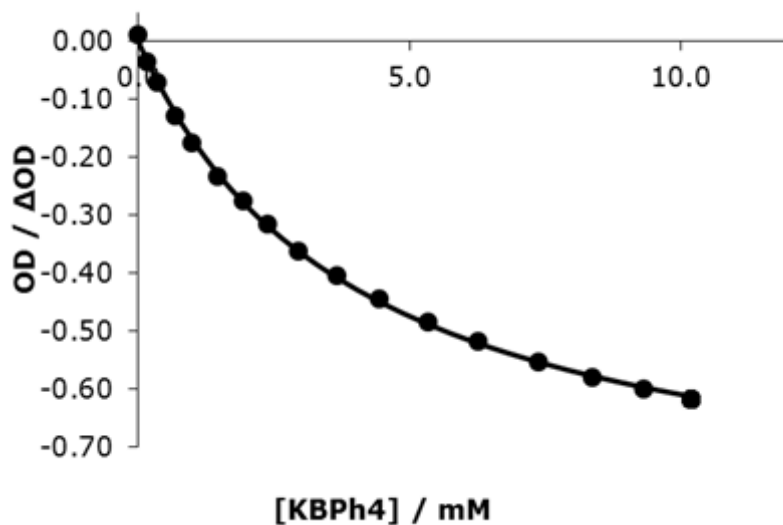

Graph S88. Binding isotherms for titration using 1:1 fitting program for titration of KBPh<sub>4</sub> against Reichardt's dye in acetone + 0.1% H<sub>2</sub>O. [Reichardt's dye] = 0.15 mM and [KBPh<sub>4</sub>] = 34 mM,  $\Delta OD = -0.847$ .

$$K_a = 260 \pm 21 \text{ M}^{-1}$$

72% bound

c) Titration of Reichardt's dye with  $\text{NaN}(\text{SO}_2\text{CF}_3)_2$  in acetone with 0.1%  $\text{H}_2\text{O}$  added



Host: Reichardt's dye = 0.16 mM

Guest:  $\text{NaN}(\text{SO}_2\text{CF}_3)_2$  = 81 mM

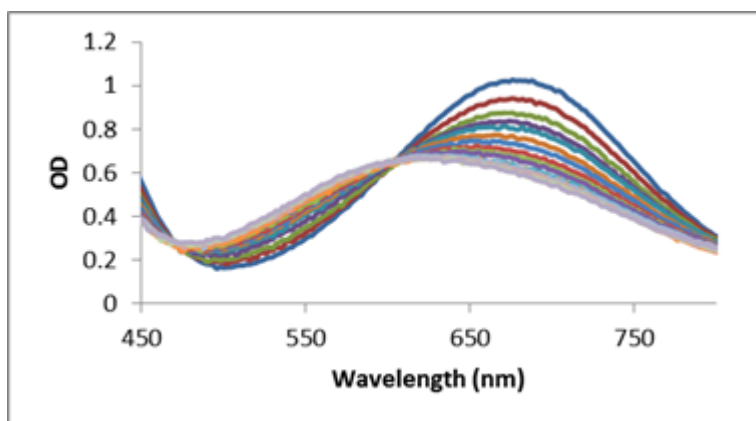

*Graph S89.* UV/vis spectra of titration of  $\text{NaN}(\text{SO}_2\text{CF}_3)_2$  with Reichardt's dye in acetone with 0.1%  $\text{H}_2\text{O}$  added.

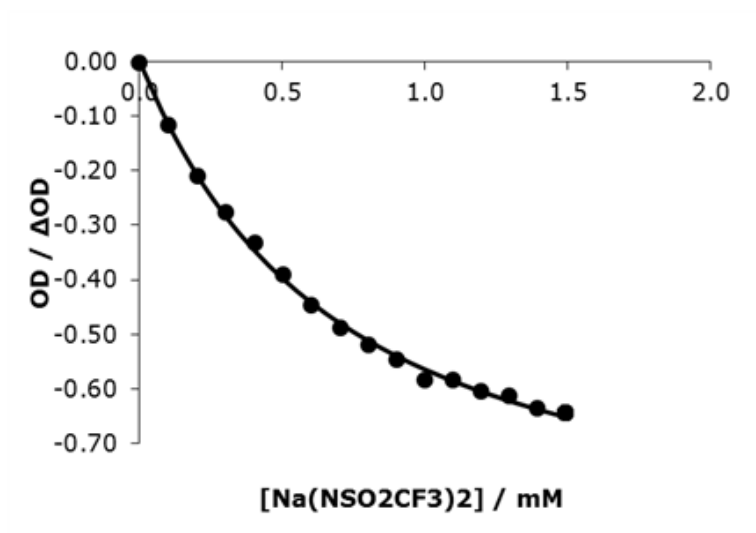

*Graph S90.* Binding isotherms for titration using 1:1 fitting program for titration of phenol against Reichardt's dye in acetone with 0.1%  $\text{H}_2\text{O}$  added.  $[\text{Reichardt's dye}] = 0.16 \text{ mM}$  and  $[\text{NaN}(\text{SO}_2\text{CF}_3)_2] = 81 \text{ mM}$ ,  $\Delta\text{OD} = -0.921$ .

$$K_a = 1500 \pm 500 \text{ M}^{-1} \quad 71\% \text{ bound}$$

## 9. Titration Curves for Reichardt's dye (1) in Acetone with 0.25 % H<sub>2</sub>O added

a) Titration of Reichardt's dye with phenol in acetone + 0.25% H<sub>2</sub>O added

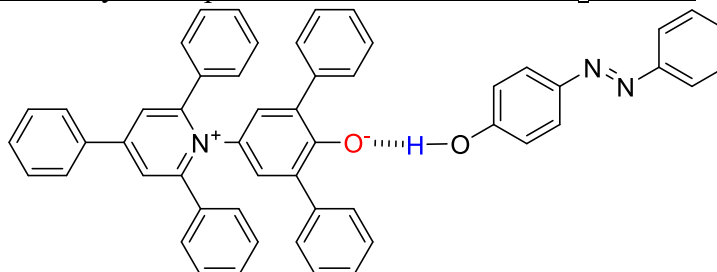

Host: Reichardt's dye = 0.15 mM

Guest: 4-phenylazophenol = 17 mM

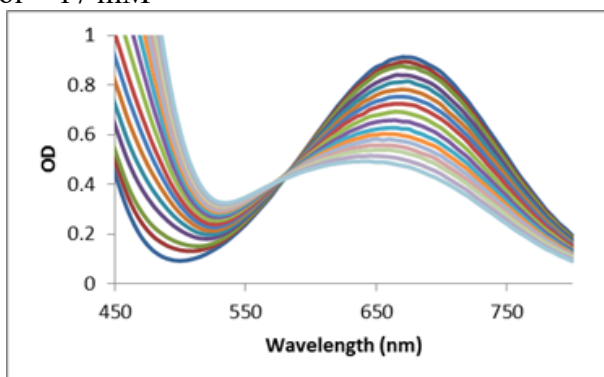

*Graph S91.* UV/vis spectra of titration of Reichardt's dye with 4-phenylazophenol in acetone with 0.25% H<sub>2</sub>O added.

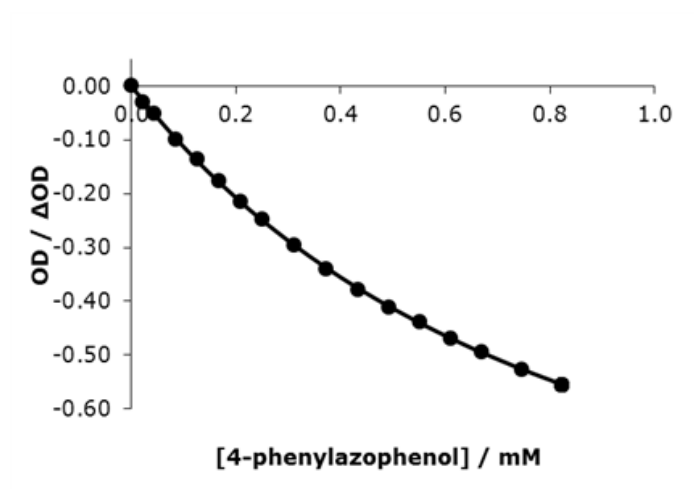

*Graph S92.* Binding isotherms for titration using 1:1 and accounting for a non-specific secondary interaction fitting program for titration of 4-phenylazophenol against Reichardt's dye in acetone with 0.25% H<sub>2</sub>O added. [Reichardt's dye] = 0.15 mM and [4-phenylazophenol] = 17 mM, ΔOD = -1.100.

$$K_a = 1300 \pm 71 \text{ M}^{-1}$$

50% bound



b) Titration of Reichardt's dye with  $\text{NaN}(\text{SO}_2\text{CF}_3)_2$  in acetone with 0.25%  $\text{H}_2\text{O}$  added



Host: Reichardt's dye = 0.15 mM

Guest:  $\text{NaN}(\text{SO}_2\text{CF}_3)_2$  = 89 mM

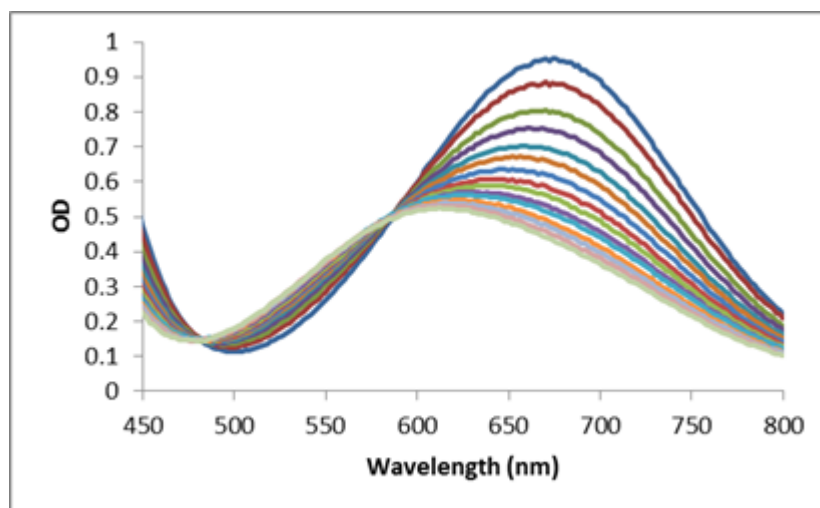

Graph S93. UV/vis spectra of titration of  $\text{NaN}(\text{SO}_2\text{CF}_3)_2$  with Reichardt's dye in acetone with 0.25%  $\text{H}_2\text{O}$  added.

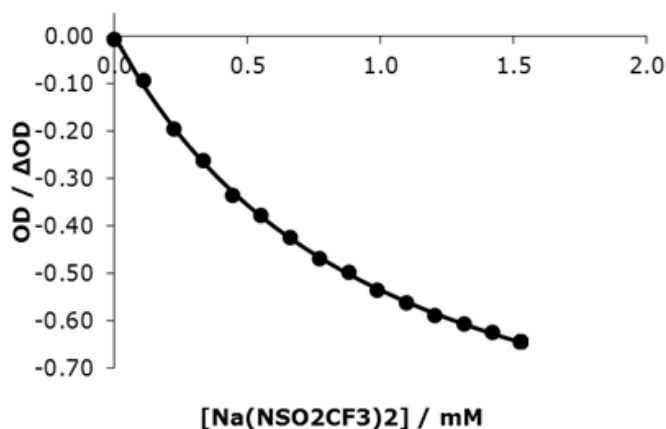

Graph S94. Binding isotherms for titration using 1:1 fitting program for titration of phenol against Reichardt's dye in acetone with 0.5%  $\text{H}_2\text{O}$  added.  $[\text{Reichardt's dye}] = 0.15 \text{ mM}$  and  $[\text{NaN}(\text{SO}_2\text{CF}_3)_2] = 89 \text{ mM}$ ,  $\Delta\text{OD} = -1.023$ .

$$K_a = 1100 \pm 200 \text{ M}^{-1} \quad 63\% \text{ bound}$$

c) Titration of Reichardt's dye with KBPh<sub>4</sub> in acetone with 0.25% H<sub>2</sub>O



Host: Reichardt's dye = 0.15 mM

Guest: KBPh<sub>4</sub> = 45 mM

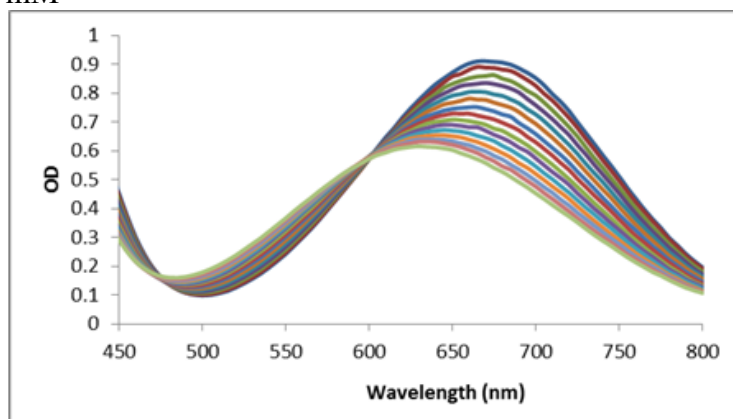

Graph S95. UV/vis spectra of titration of KBPh<sub>4</sub> with Reichardt's dye in acetone + 0.25% H<sub>2</sub>O.

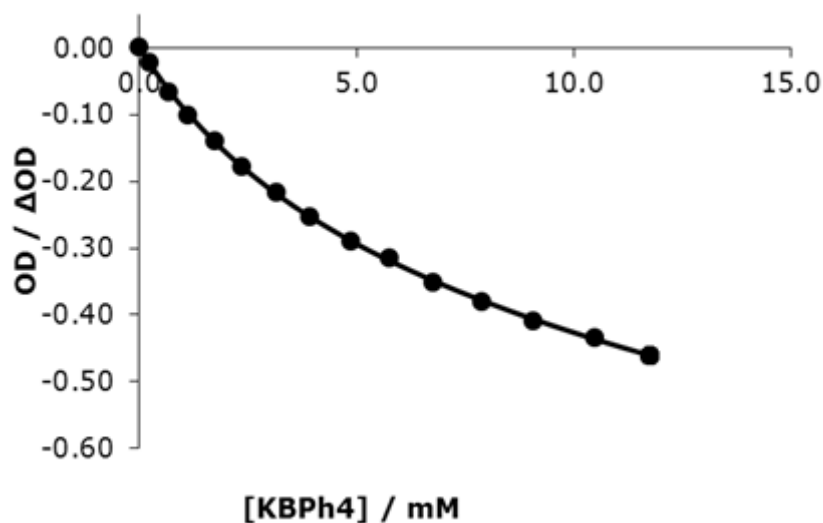

Graph S96. Binding isotherms for titration using 1:1 fitting program and accounting for a non-specific interaction for titration of KBPh<sub>4</sub> against Reichardt's dye in acetone + 0.25% H<sub>2</sub>O. [Reichardt's dye] = 0.15 mM and [KBPh<sub>4</sub>] = 45 mM, ΔOD = -0.569.

$$K_a = 190 \pm 15 \text{ M}^{-1}$$

**68% bound**

## 10. Titration Curves for Reichardt's dye (1) in Acetone with 0.5 % H<sub>2</sub>O added

### a) Titration of Reichardt's dye with phenol in acetone + 0.5% H<sub>2</sub>O added



Host: Reichardt's dye = 0.16 mM

Guest: 4-phenylazophenol = 19 mM

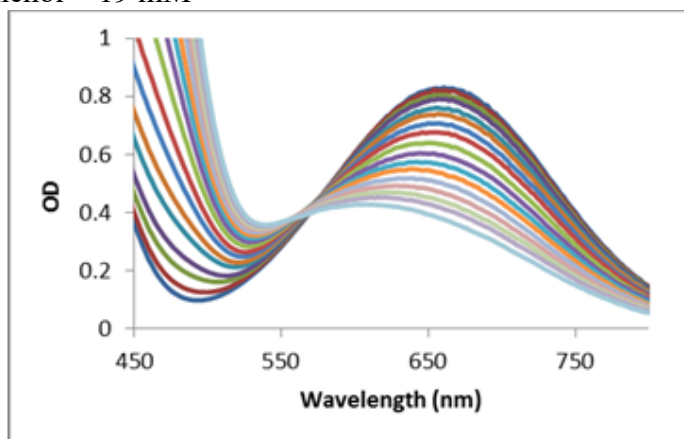

*Graph S97.* UV/vis spectra of titration of Reichardt's dye with 4-phenylazophenol in acetone with 0.5% H<sub>2</sub>O added.

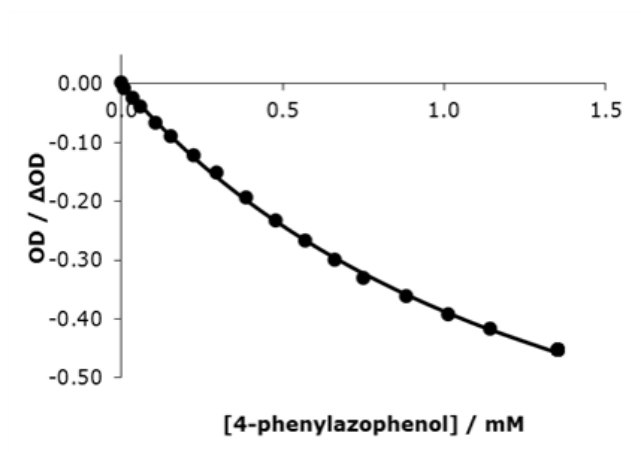

*Graph S98.* Binding isotherms for titration using 1:1 and accounting for a non-specific secondary interaction fitting program for titration of 4-phenylazophenol against Reichardt's dye in acetone with 0.5% H<sub>2</sub>O added. [Reichardt's dye] = 0.16 mM and [4-phenylazophenol] = 19 mM,  $\Delta OD = -0.922$ .

$$K_a = 860 \pm 240 \text{ M}^{-1} \quad \quad \quad 50\% \text{ bound}$$

b) Titration of Reichardt's dye with  $\text{NaN}(\text{SO}_2\text{CF}_3)_2$  in acetone with 0.5%  $\text{H}_2\text{O}$  added



Host: Reichardt's dye = 0.15 mM

Guest:  $\text{NaN}(\text{SO}_2\text{CF}_3)_2$  = 112 mM

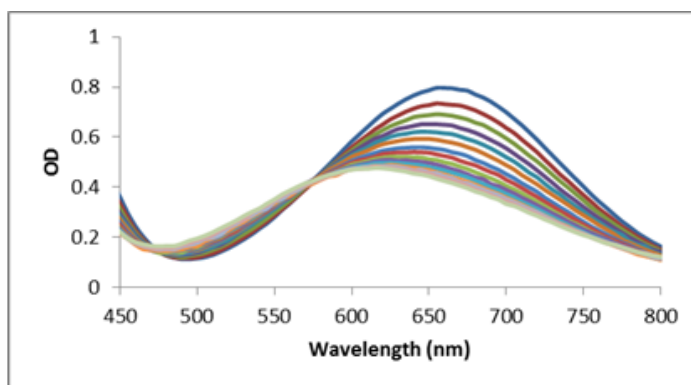

Graph S99. UV/vis spectra of titration of  $\text{NaN}(\text{SO}_2\text{CF}_3)_2$  with Reichardt's dye in acetone with 0.5%  $\text{H}_2\text{O}$  added.

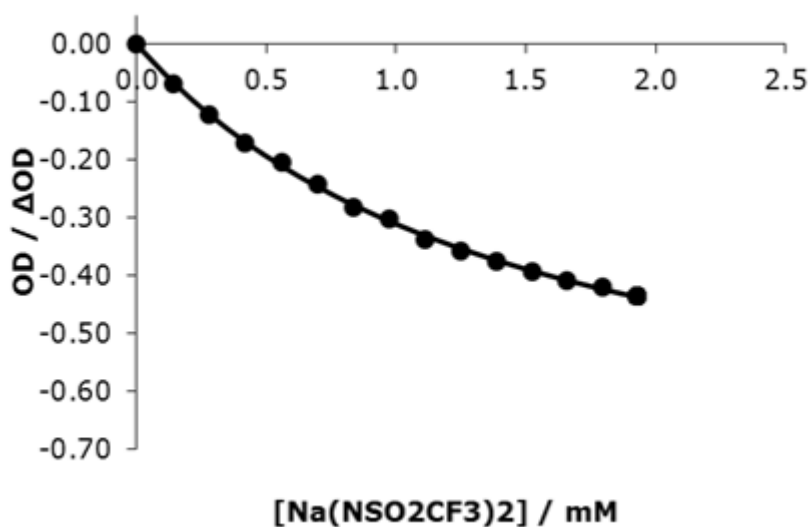

Graph S100. Binding isotherms for titration using 1:1 fitting program for titration of phenol against Reichardt's dye in acetone with 0.5%  $\text{H}_2\text{O}$  added. [Reichardt's dye] = 0.15 mM and  $[\text{NaN}(\text{SO}_2\text{CF}_3)_2]$  = 112 mM,  $\Delta\text{OD} = -0.754$ .

$$K_a = 840 \pm 280 \text{ M}^{-1}$$

58% bound

c) Titration of Reichardt's dye with KBPh<sub>4</sub> in acetone with 0.5% H<sub>2</sub>O

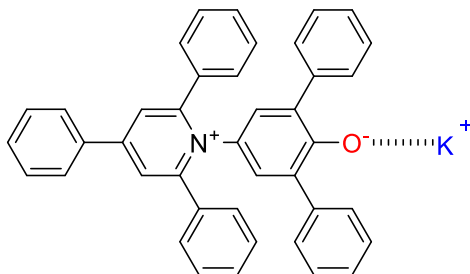

Host: Reichardt's dye = 0.15 mM

Guest: KBPh<sub>4</sub> = 20 mM

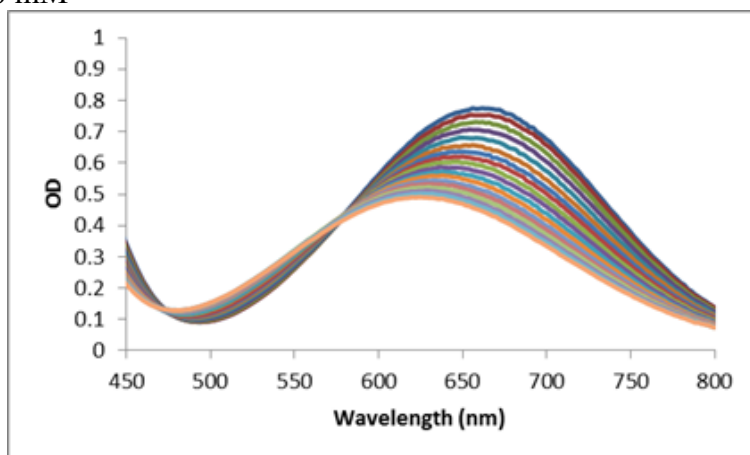

Graph S101. UV/vis spectra of titration of KBPh<sub>4</sub> with Reichardt's dye in acetone + 0.5% H<sub>2</sub>O.

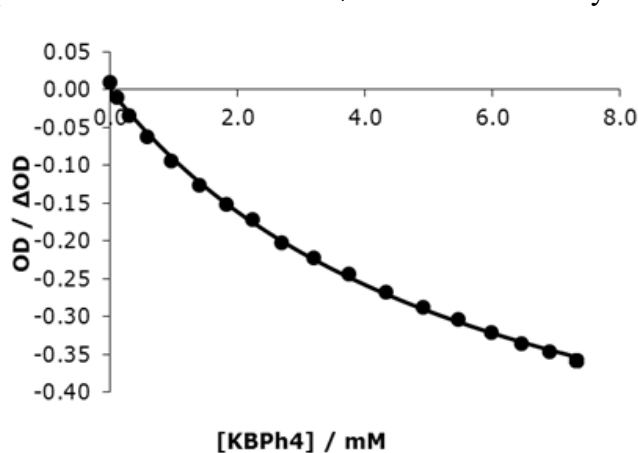

Graph S102. Binding isotherms for titration using 1:1 fitting program for titration of KBPh<sub>4</sub> against Reichardt's dye in acetone + 0.5% H<sub>2</sub>O. [Reichardt's dye] = 0.15 mM and [KBPh<sub>4</sub>] = 20 mM,  $\Delta OD = -0.632$ .

$$K_a = 170 \pm 18 \text{ M}^{-1}$$

56% bound

## 11. Titration Curves for Reichardt's dye (1) in Acetone with 1 % H<sub>2</sub>O added

### a) Titration of Reichardt's dye with phenol in acetone + 1% H<sub>2</sub>O added

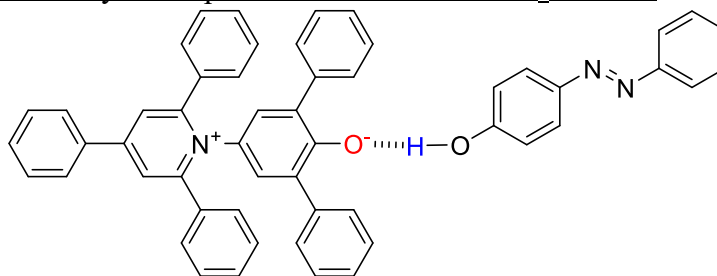

Host: Reichardt's dye = 0.21 mM

Guest: 4-phenylazophenol = 19 mM

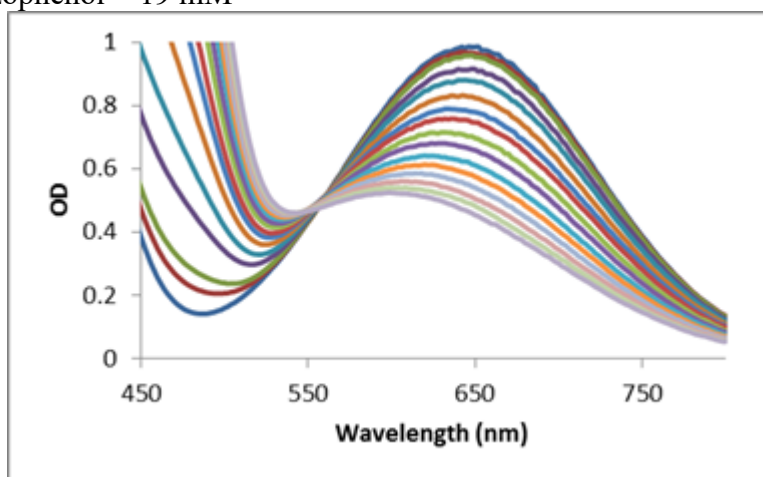

Graph S103. UV/vis spectra of titration of Reichardt's dye with 4-phenylazophenol in acetone with 1% H<sub>2</sub>O added.

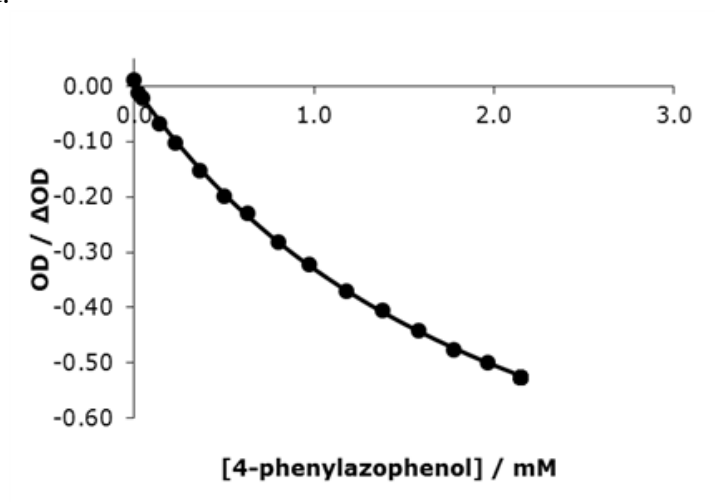

Graph S104. Binding isotherms for titration using 1:1 fitting program for titration of 4-phenylazophenol against Reichardt's dye in acetone with % H<sub>2</sub>O added. [Reichardt's dye] = 0.21 mM and [4-phenylazophenol] = 19 mM, ΔOD = -1.028.

$$K_a = 600 \pm 200 \text{ M}^{-1}$$

**51% bound**

b) Titration of Reichardt's dye with  $\text{NaN}(\text{SO}_2\text{CF}_3)_2$  in acetone with 1%  $\text{H}_2\text{O}$  added



Host: Reichardt's dye = 0.25 mM

Guest:  $\text{NaN}(\text{SO}_2\text{CF}_3)_2$  = 120 mM

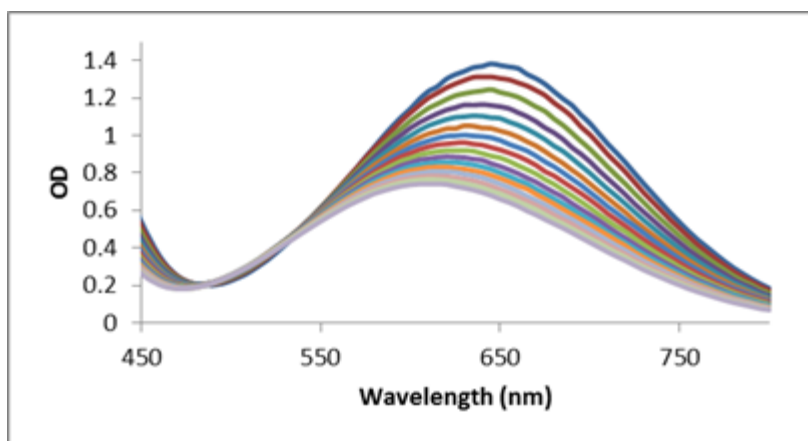

*Graph S105.* UV/vis spectra of titration of  $\text{NaN}(\text{SO}_2\text{CF}_3)_2$  with Reichardt's dye in acetone with 1%  $\text{H}_2\text{O}$  added.

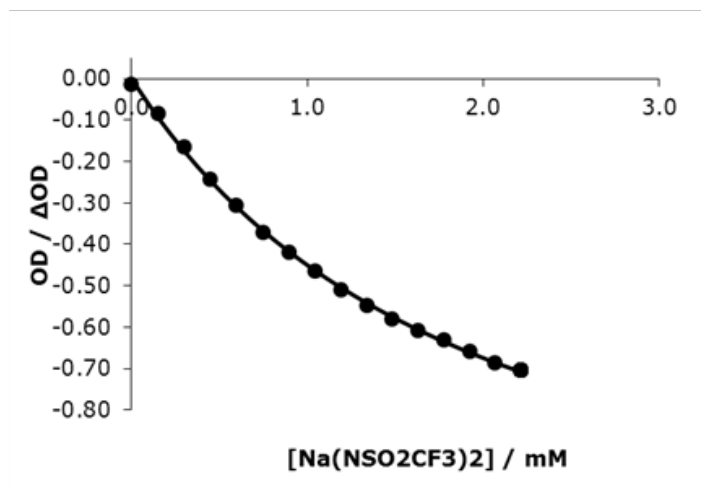

*Graph S106.* Binding isotherms for titration using 1:1 fitting program for titration of phenol against Reichardt's dye in acetone with 1%  $\text{H}_2\text{O}$  added. [Reichardt's dye] = 0.25 mM and  $[\text{NaN}(\text{SO}_2\text{CF}_3)_2]$  = 120 mM,  $\Delta\text{OD} = -1.287$ .

$$K_a = 550 \pm 120 \text{ M}^{-1}$$

**55% bound**

c) Titration of Reichardt's dye with KBPh<sub>4</sub> in acetone with 1% H<sub>2</sub>O



Host: Reichardt's dye = 0.25 mM

Guest: KBPh<sub>4</sub> = 25 mM

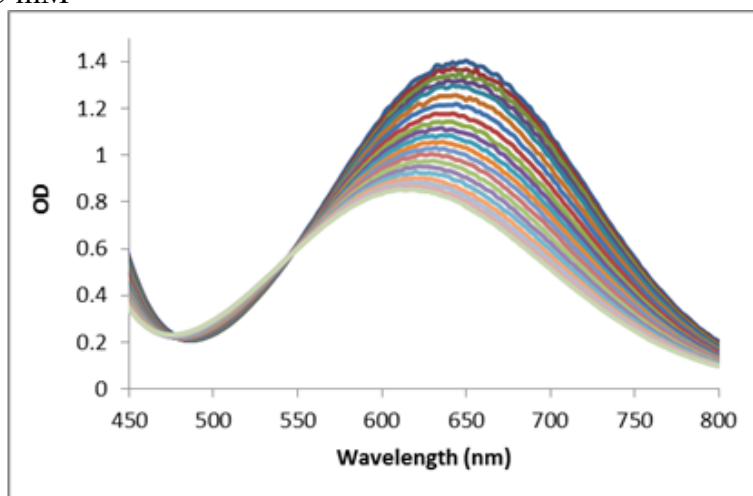

Graph S107. UV/vis spectra of titration of KBPh<sub>4</sub> with Reichardt's dye in acetone + 1% H<sub>2</sub>O.

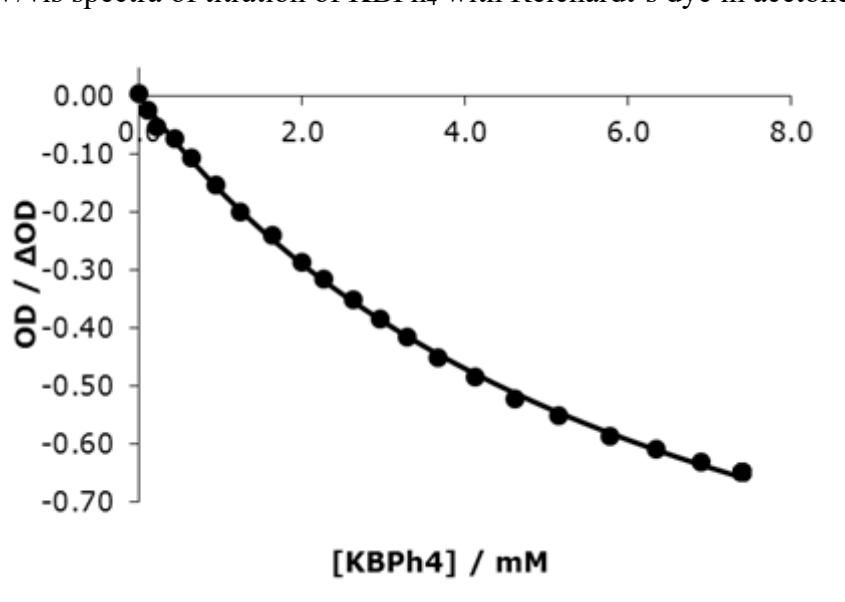

Graph S108. Binding isotherms for titration using 1:1 fitting program for titration of KBPh<sub>4</sub> against Reichardt's dye in acetone + 1% H<sub>2</sub>O. [Reichardt's dye] = 0.25 mM and [KBPh<sub>4</sub>] = 22 mM,  $\Delta OD = -1.226$ .

$$K_a = 132 \pm 70 \text{ M}^{-1}$$

54% bound



## 12. Titration Curves for Reichardt's dye (1) in Chloroform

### a) Titration of Reichardt's dye with 4-phenylazophenol in chloroform

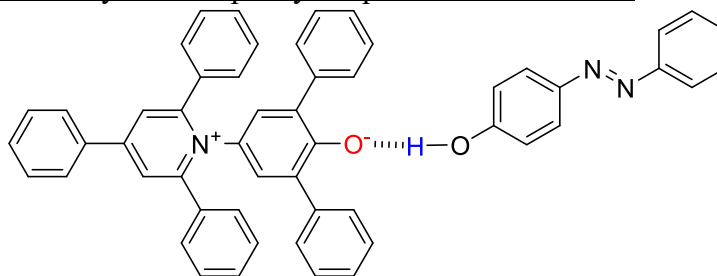

Host: Reichardt's dye = 0.056 mM

Guest: 4-phenylazophenol = 13 mM

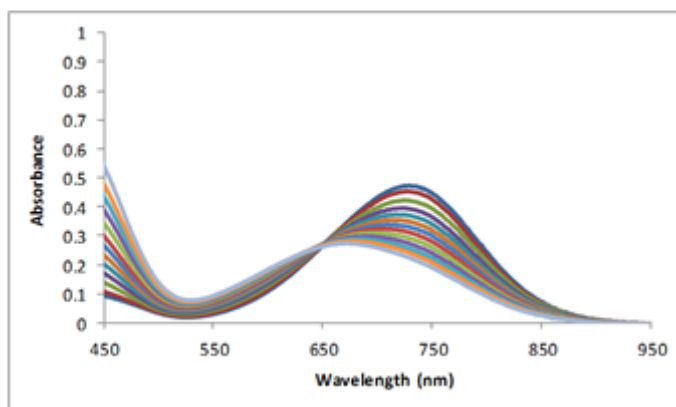

*Graph S109.* UV/vis spectra of titration of 4-phenylazophenol with Reichardt's dye in chloroform.

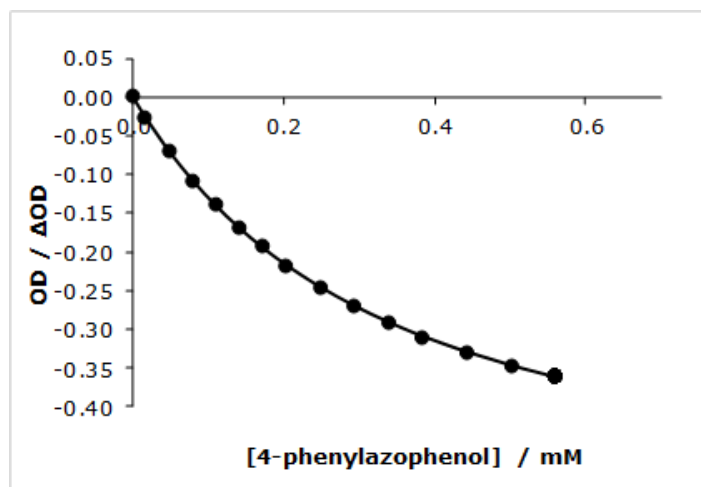

*Graph S110.* Binding isotherms for titration using 1:1 fitting program for titration of 4-phenylazophenol against Reichardt's dye in acetonitrile. [Reichardt's dye] = 0.056 mM and [4-phenylazophenol] = 13 mM,  $\Delta OD = -0.560$ .

$$K_a = 3970 \pm 707 \text{ M}^{-1} \quad \quad \quad 65\% \text{ bound}$$

b) Titration of Reichardt's dye with phenol in chloroform

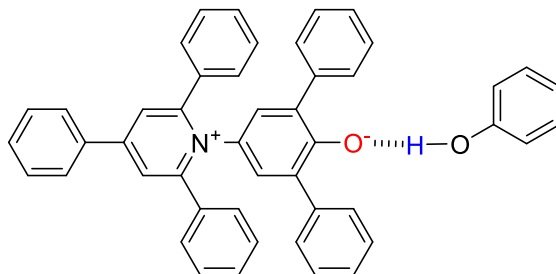

Host: Reichardt's dye = 0.11 mM

Guest: phenol = 110 mM

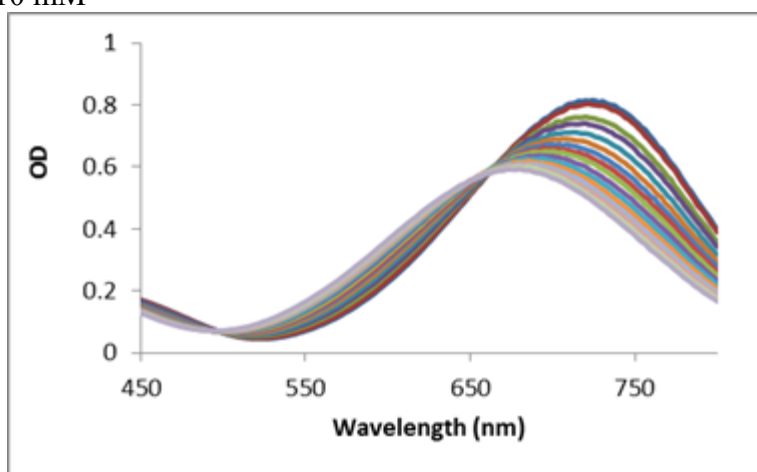

Graph S111. UV/vis spectra of titration of phenol with Reichardt's dye in chloroform.

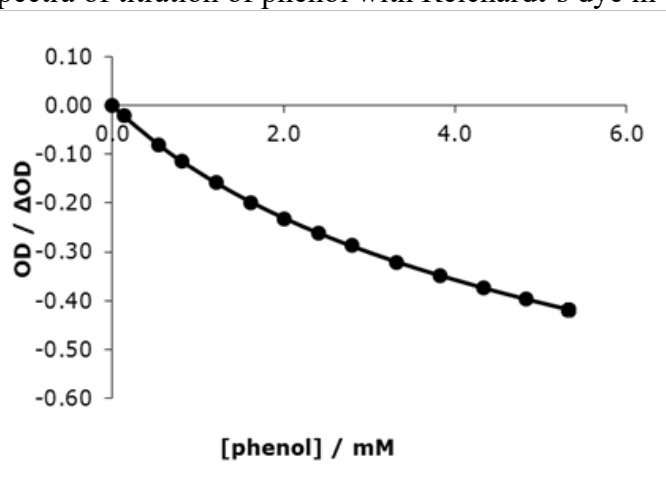

Graph S112. Binding isotherms for titration using 1:1 fitting program and accounting for a nonspecific interaction for titration of phenol against Reichardt's dye in chloroform. [Reichardt's dye] = 0.11 mM and [phenol] = 110 mM,  $\Delta OD = -0.628$ .

$$K_a = 260 \pm 55 \text{ M}^{-1}$$

**59% bound**

c) Titration of Reichardt's dye with 5-nitroindole in chloroform

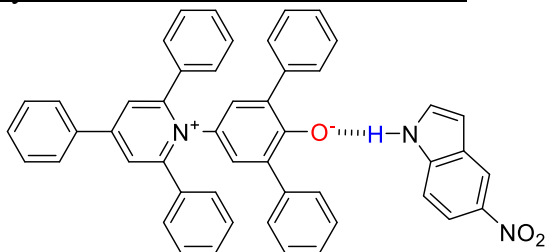

Host: Reichardt's dye = 0.11 mM

Guest: 5-nitroindole = 30 mM

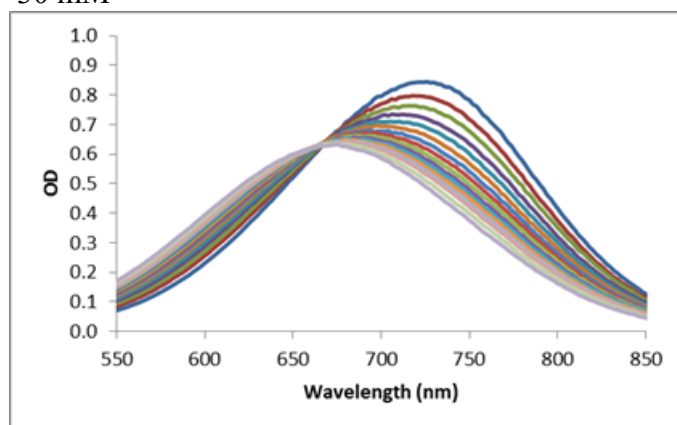

Graph S113. UV/vis spectra of titration of Reichardt's dye with 5-nitroindole in chloroform.

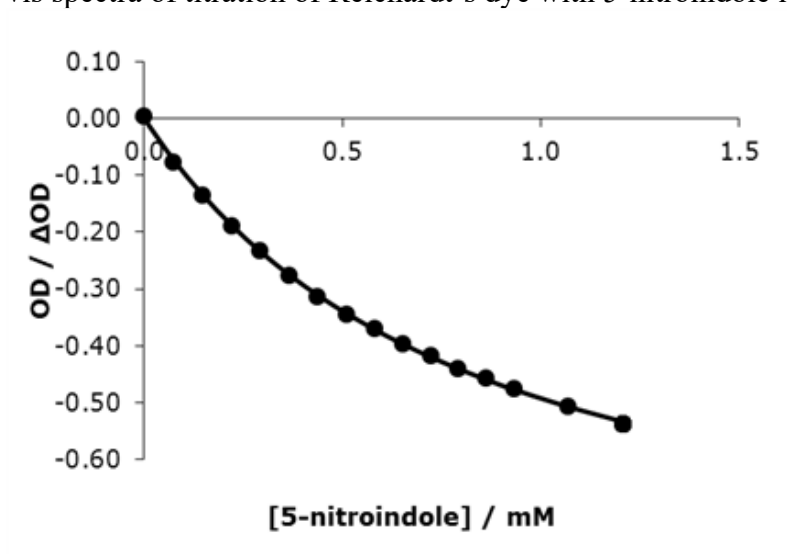

Graph S114. Binding isotherms for titration using 1:1 fitting program for titration of 5-nitroindole against Reichardt's dye in chloroform. [Reichardt's dye] = 0.11 mM and [5-nitroindole] = 30 mM,  $\Delta OD = -0.868$ .

$$K_a = 1200 \pm 500 \text{ M}^{-1}$$

61% bound

### 13. Titration Curves for Phosphine oxide (2) in Acetonitrile

a) Titration of 4-nitro,3-trifluoromethylphenol with phosphine oxide in acetonitrile

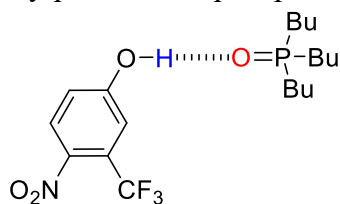

Host: 4-nitro,3-trifluoromethylphenol = 0.12 mM

Guest: phosphine oxide = 184 mM

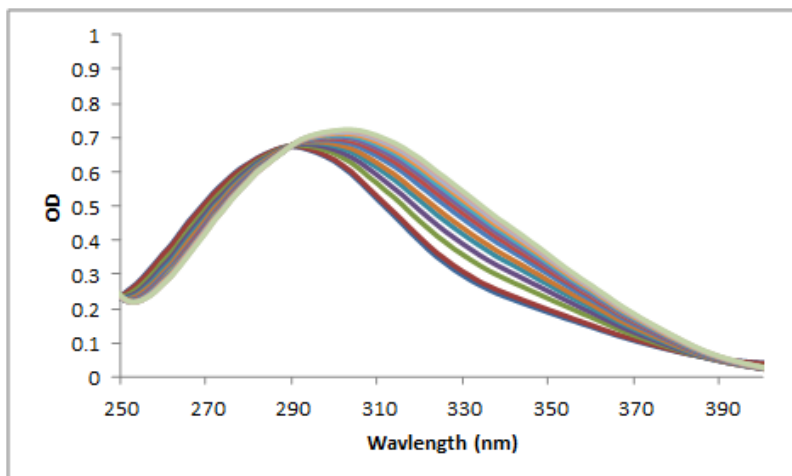

Graph S115. UV/vis spectra of titration of phosphine oxide with 4-nitro,3-trifluoromethylphenol in acetonitrile.

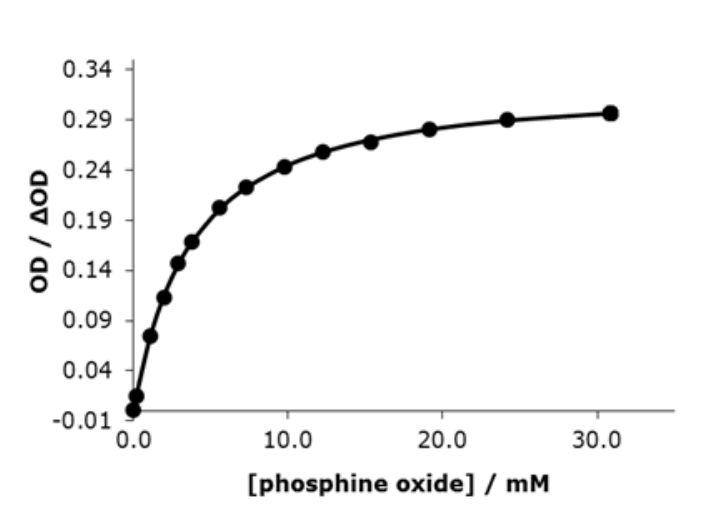

Graph S116. Binding isotherm for titration using 1:1 fitting program and accounting for a non-specific interaction for titration of phosphine oxide against 4-nitro,3-trifluoromethylphenol in acetonitrile. [4-nitro,3-trifluoromethylphenol] = 0.12 mM and [phosphine oxide] = 184 mM,  $\Delta OD = 0.334$ .

$$K_a = 300 \pm 98 \text{ M}^{-1}$$

**89% bound**

b) Titration of 4-phenylazophenol with phosphine oxide in acetonitrile

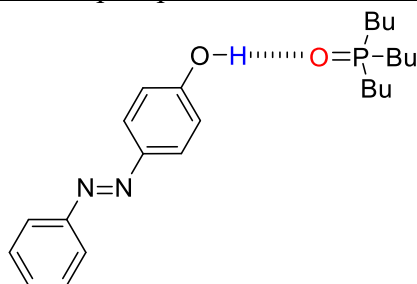

Host: 4-phenylazophenol = 0.029 mM

Guest: phosphine oxide = 114 mM

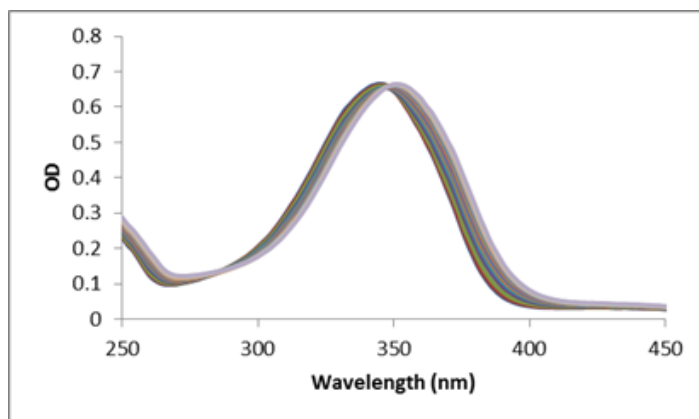

Graph S117. UV/vis spectra of titration of phosphine oxide with 4-phenylazophenol in acetonitrile.

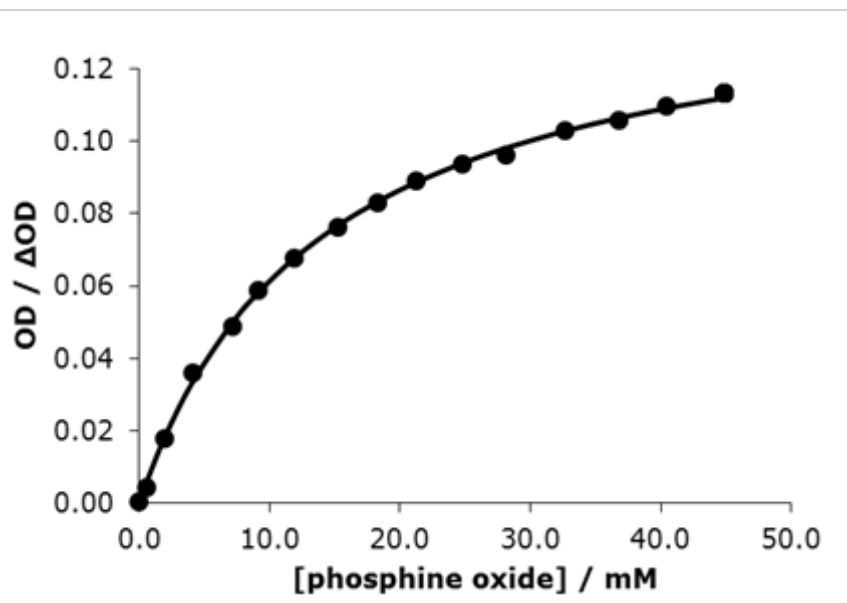

Graph S118. Binding isotherm for titration using 1:1 fitting program and accounting for a non-specific interaction for titration of phosphine oxide against 4-phenylazophenol in acetonitrile. [4-phenylazophenol] = 0.029 mM and [phosphine oxide] = 114 mM,  $\Delta OD = 0.146$ .

$$K_a = 69 \pm 9 \text{ M}^{-1} \quad 77\% \text{ bound}$$

c) Titration of 4-nitrophenol with phosphine oxide in acetonitrile

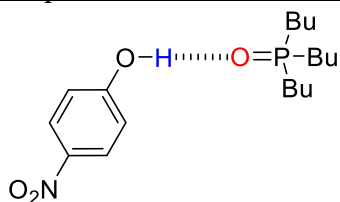

Host: 4-nitrophenol = 0.085 mM

Guest: phosphine oxide = 48 mM

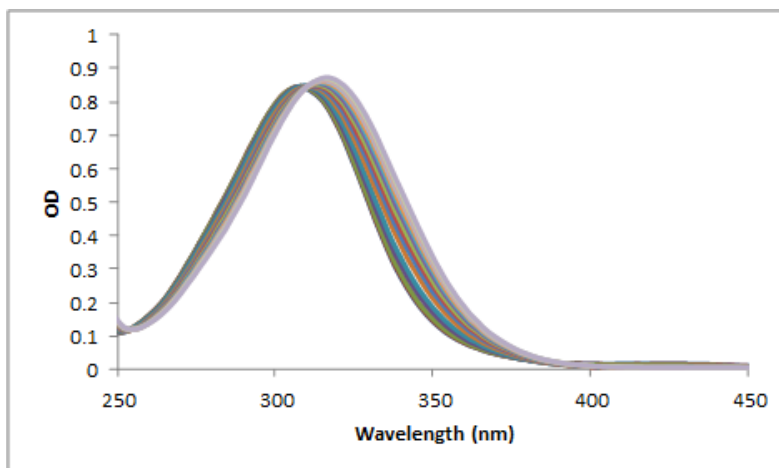

Graph S119. UV/vis spectra of titration of phosphine oxide with 4-nitrophenol in acetonitrile.

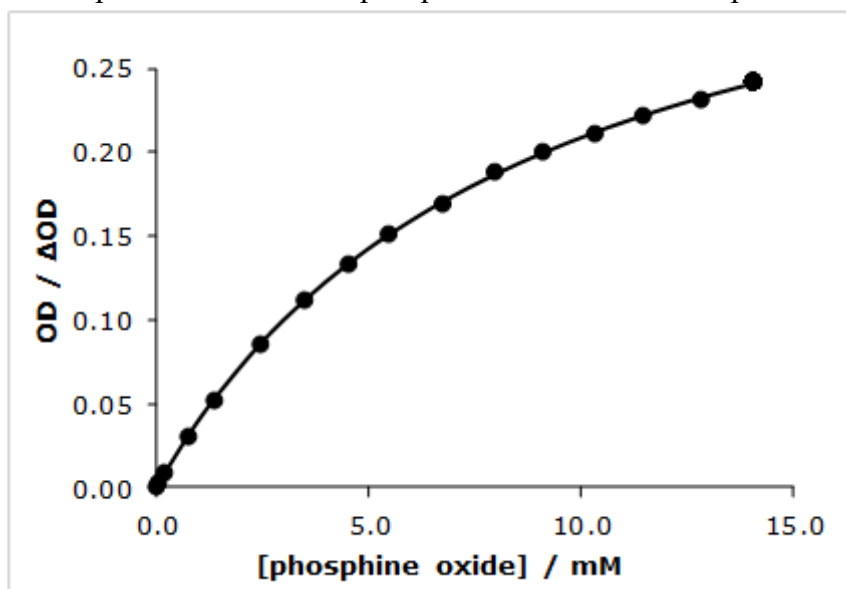

Graph S120. Binding isotherm for titration using 1:1 fitting program and accounting for a non-specific interaction for titration of phosphine oxide against 4-nitrophenol in acetonitrile. [4-nitrophenol] = 0.085 mM and [phosphine oxide] = 48 mM,  $\Delta OD = 0.389$ .

$$K_a = 110 \pm 36 \text{ M}^{-1}$$

62% bound

#### 14. Titration Curves for phosphine oxide (2) in Chloroform

a) Titration of 4-nitro,3-trifluoromethylphenol with phosphine oxide in chloroform

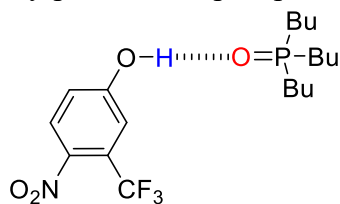

Host: 4-nitro,3-trifluoromethylphenol = 0.12 mM

Guest: phosphine oxide = 47 mM

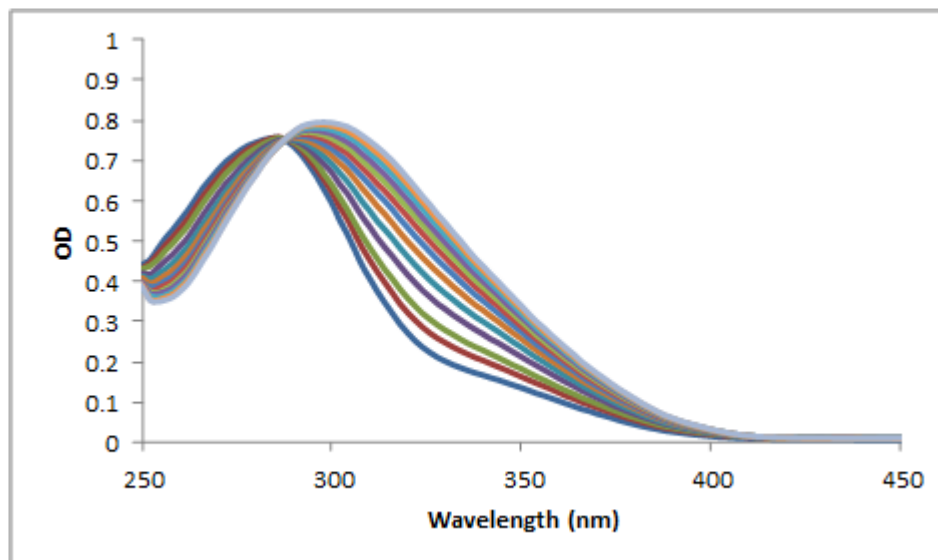

Graph S121. UV/vis spectra of titration of phosphine oxide with 4-nitro,3-trifluoromethylphenol in chloroform.

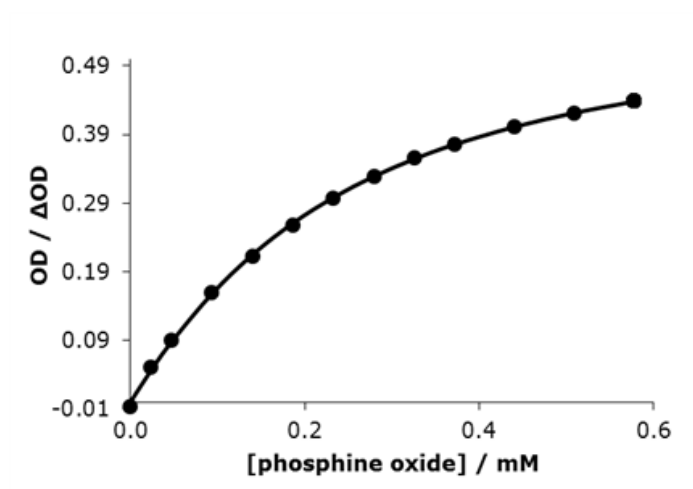

Graph S122. Binding isotherm for titration using 1:1 fitting program and accounting for a non-specific interaction for titration of phosphine oxide against 4-nitro,3-trifluoromethylphenol in chloroform. [4-nitro,3-trifluoromethylphenol] = 0.12 mM and [phosphine oxide] = 47 mM,  $\Delta OD = 0.588$ .

$$K_a = 5400 \pm 1700 \text{ M}^{-1}$$

75% bound

b) Titration of 4-nitrophenol with phosphine oxide in chloroform

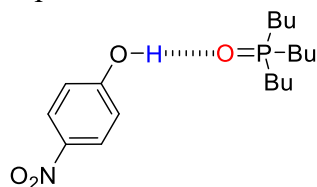

Host: 4-nitrophenol = 0.072 mM

Guest: phosphine oxide = 30 mM

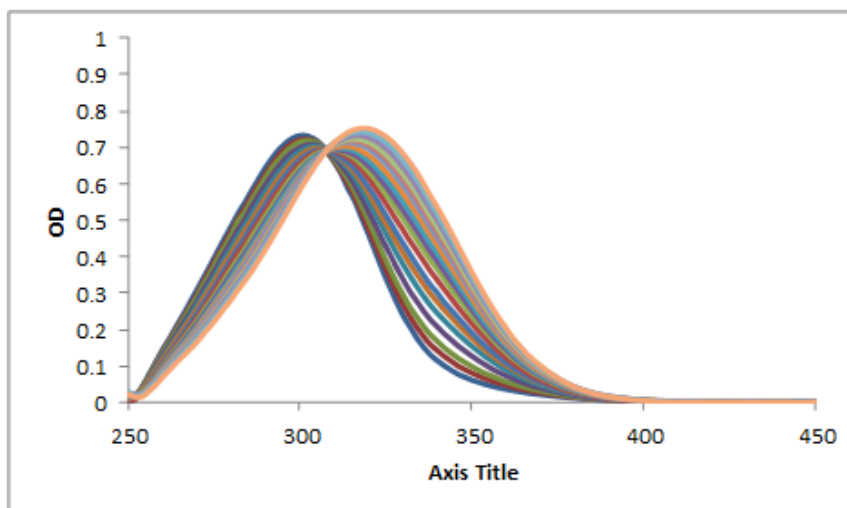

Graph S123. UV/vis spectra of titration of phosphine oxide with 4-nitrophenol in  $\text{CHCl}_3$ .

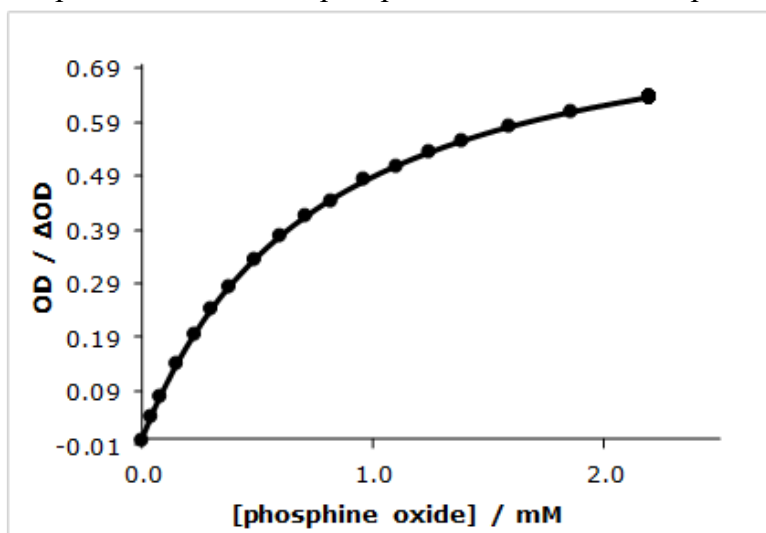

Graph S124. Binding isotherm for titration using 1:1 fitting program and accounting for a non-specific interaction for titration of phosphine oxide against 4-nitrophenol in chloroform.  $[4\text{-nitrophenol}] = 0.072 \text{ mM}$  and  $[\text{phosphine oxide}] = 30 \text{ mM}$ ,  $\Delta\text{OD} = 0.847$ .

$$K_a = 1400 \pm 110 \text{ M}^{-1} \quad \quad \quad 75\% \text{ bound}$$



c) Titration of 4-phenylazophenol with phosphine oxide in chloroform

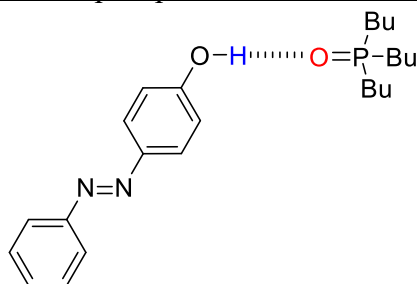

Host: 4-phenylazophenol = 0.049 mM

Guest: phosphine oxide = 68 mM

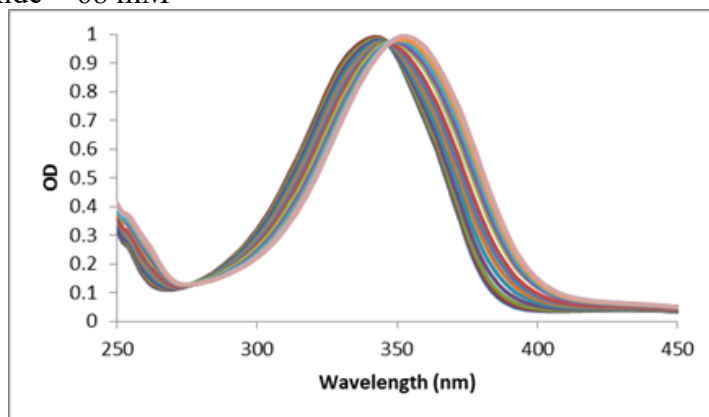

Graph S125. UV/vis spectra of titration of phosphine oxide with 4-phenylazophenol in chloroform.

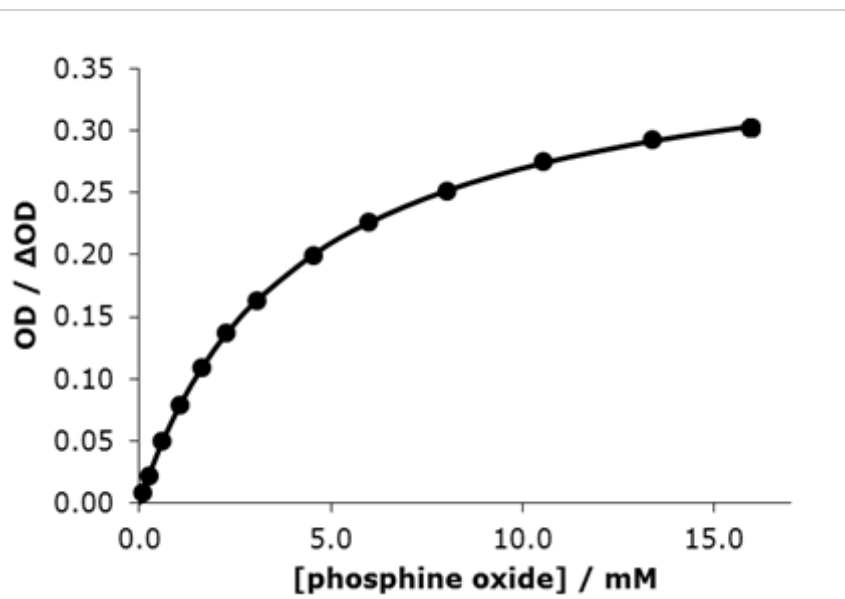

Graph S126. Binding isotherm for titration using 1:1 fitting program and accounting for a non-specific interaction for titration of phosphine oxide against 4-phenylazophenol in chloroform. [4-phenylazophenol] = 0.049 mM and [phosphine oxide] = 68 mM,  $\Delta OD = 0.371$ .

$$K_a = 240 \pm 45 \text{ M}^{-1}$$

**80% bound**

d) Titration of 5-nitroindole with phosphine oxide in chloroform

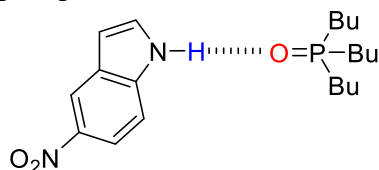

Host: 5-nitroindole = 0.09 mM

Guest: phosphine oxide = 116 mM

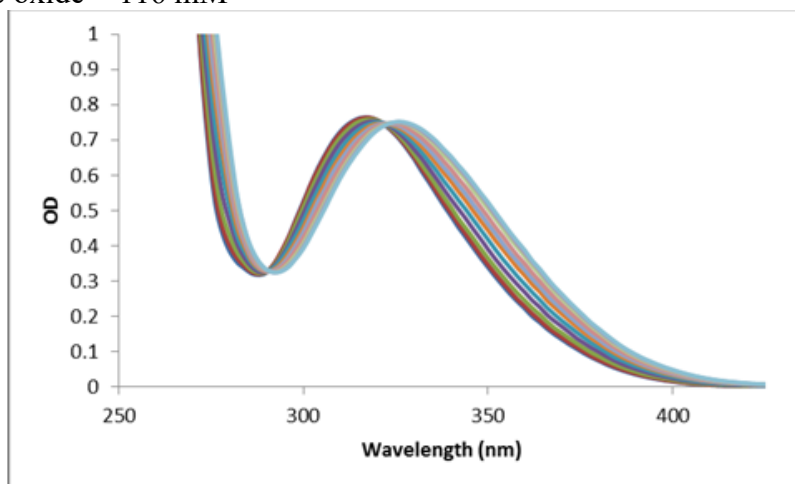

Graph S127. UV/vis spectra of titration of phosphine oxide with 5-nitroindole in chloroform.

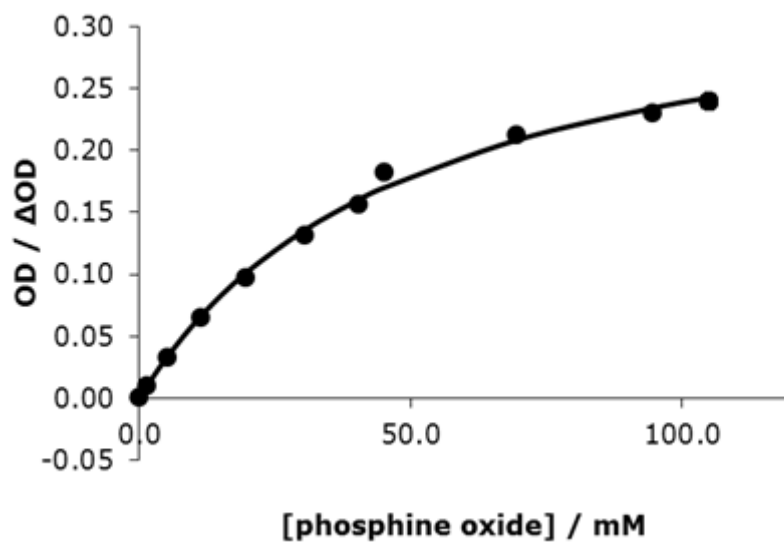

Graph S128. Binding isotherm for titration using 1:1 fitting program for titration of phosphine oxide against 5-nitroindole in chloroform. [5-nitroindole] = 0.09 mM and [phosphine oxide] = 116 mM,  $\Delta OD = 0.357$ .

$$K_a = 18 \pm 6 \text{ M}^{-1} \quad \quad \quad 68\% \text{ bound}$$

## 15. Titration Curves for phosphine oxide (2) in Acetone

### a) Titration of 4-phenylazophenol with phosphine oxide in acetone

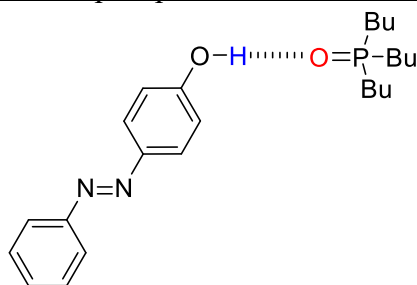

Host: 4-phenylazophenol = 0.052 mM

Guest: phosphine oxide = 166 mM

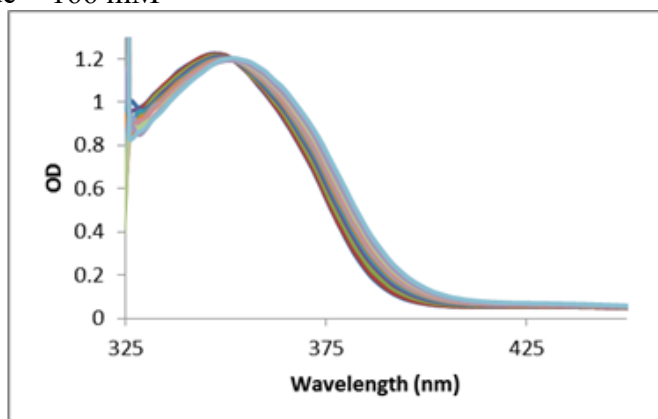

Graph S129. UV/vis spectra of titration of phosphine oxide with 4-phenylazophenol in acetone.

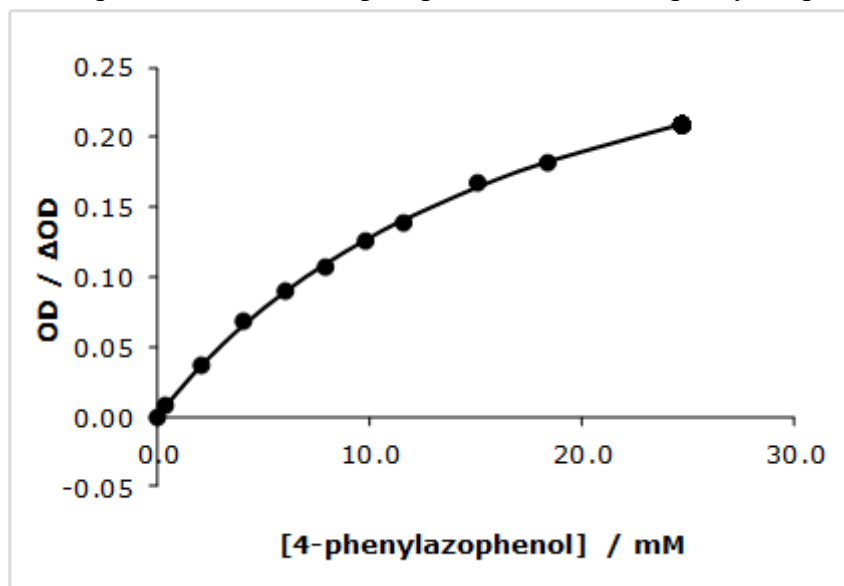

Graph S130. Binding isotherm for titration using 1:1 fitting program and accounting for a non-specific interaction for titration of phosphine oxide against 4-phenylazophenol in acetone. [4-phenylazophenol] = 0.052 mM and [phosphine oxide] = 166 mM,  $\Delta OD = 0.366$ .

$$K_a = 48 \pm 16 \text{ M}^{-1} \quad 57\% \text{ bound}$$

## 16. Titration Curves for phosphine oxide (2) in Carbon Tetrachloride

### a) Titration of 4-phenylazophenol with phosphine oxide in carbon tetrachloride

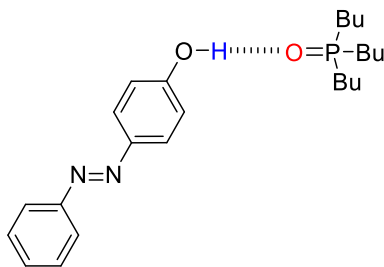

Host: 4-phenylazophenol = 0.029 mM

Guest: phosphine oxide = 34 mM

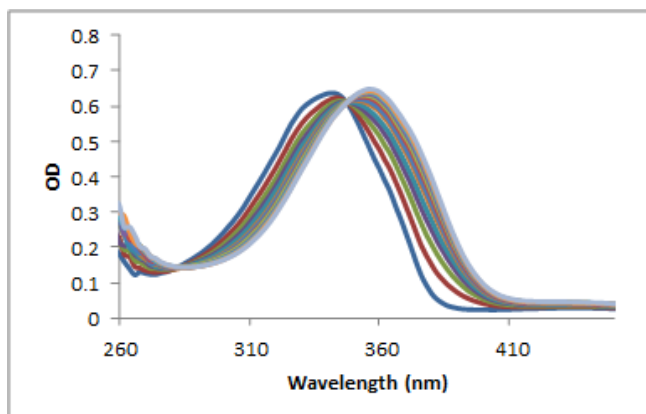

Graph S131. UV/vis spectra of titration of phosphine oxide with 4-phenylazophenol in carbon tetrachloride.

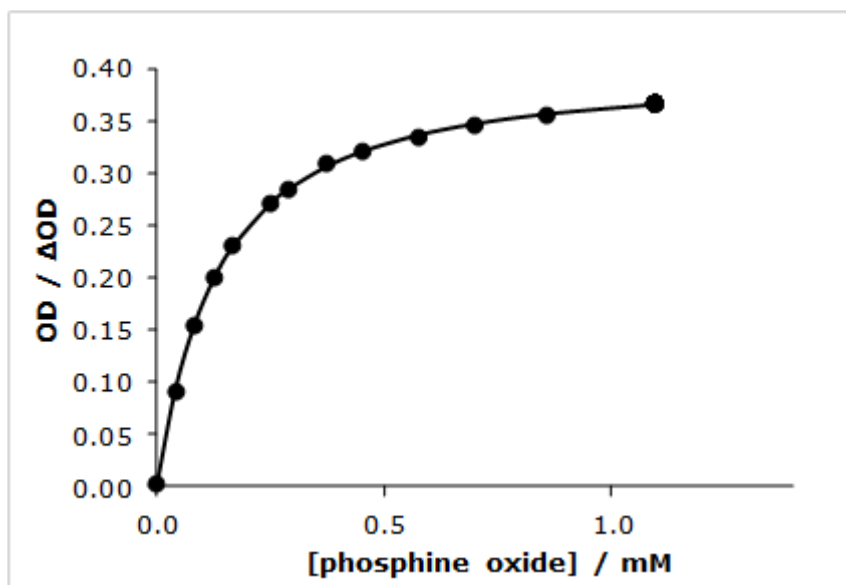

Graph S132. Binding isotherm for titration using 1:1 fitting program and accounting for a non-specific interaction for titration of phosphine oxide against 4-phenylazophenol in  $\text{CCl}_4$ . [4-phenylazophenol] = 0.029 mM and [phosphine oxide] = 34 mM,  $\Delta\text{OD} = 0.413$ .

$$K_a = 9200 \pm 1900 \text{ M}^{-1} \quad 90\% \text{ bound}$$

b) Titration of 4-nitrophenol with phosphine oxide in carbon tetrachloride

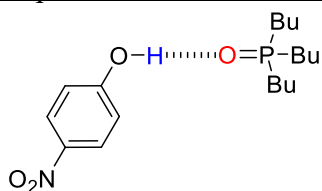

Host: 4-nitrophenol = 0.071 mM  
Guest: phosphine oxide = 16 mM

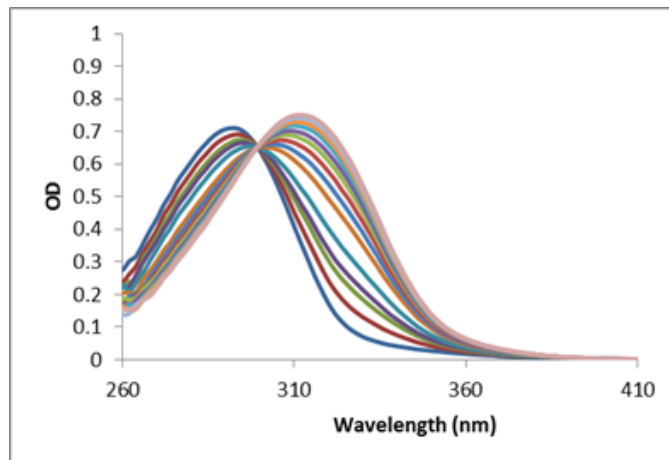

Graph S133. UV/vis spectra of titration of phosphine oxide with 4-nitrophenol in carbon tetrachloride.

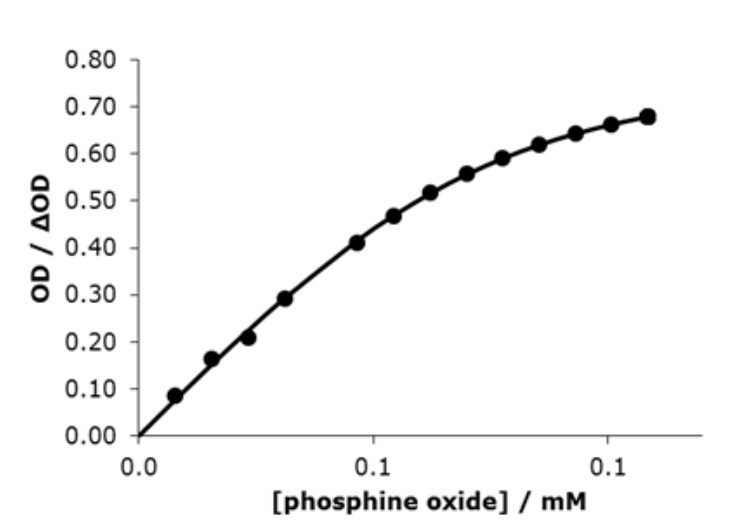

Graph S134. Binding isotherm for titration using 1:1 fitting program and accounting for a non-specific interaction for titration of phosphine oxide against 4-nitrophenol in carbon tetrachloride. [4-nitrophenol] = 0.071 mM and [phosphine oxide] = 16 mM,  $\Delta OD = 0.818$ .

$$K_a = 98600 \pm 19000 \text{ M}^{-1}$$

83% bound

c) Titration of 5-nitroindole with phosphine oxide in carbon tetrachloride

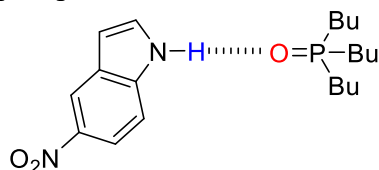

Host: 5-nitroindole = 0.08 mM

Guest: phosphine oxide = 140 mM

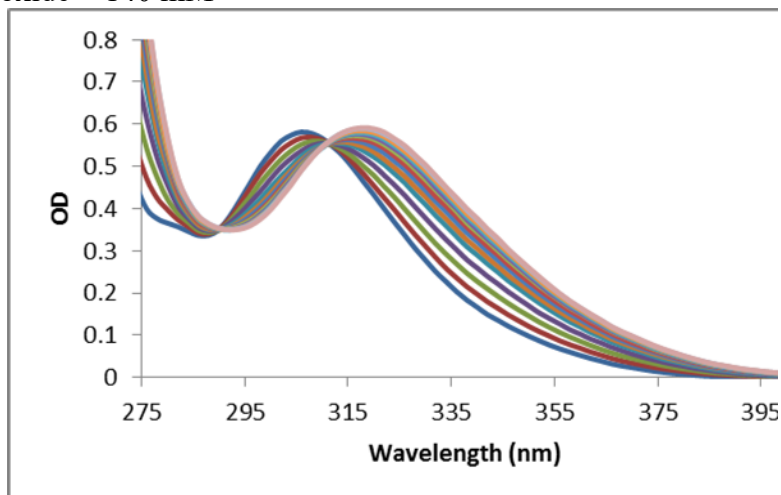

*Graph S135.* UV/vis spectra of titration of phosphine oxide with 5-nitroindole in carbon tetrachloride.

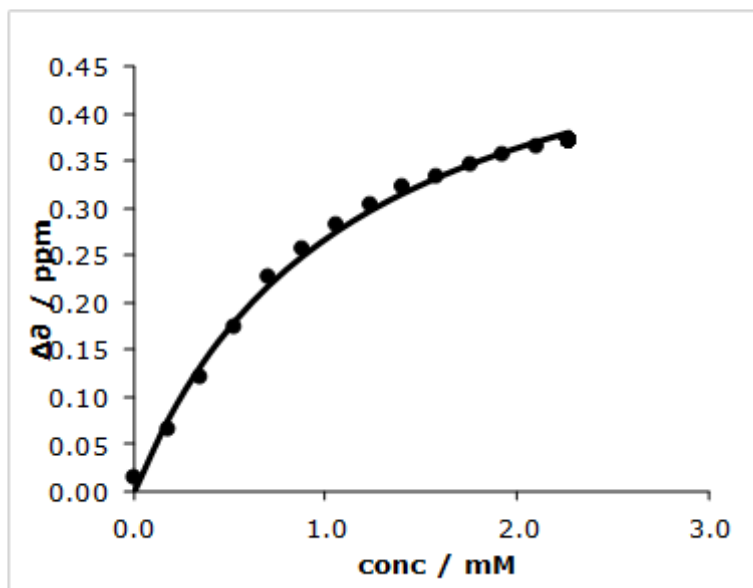

*Graph S136.* Binding isotherm for titration using 1:1 fitting program for titration of phosphine oxide against 5-nitroindole in carbon tetrachloride. [5-nitroindole] = 0.08 mM and [phosphine oxide] = 140 mM,  $\Delta OD = 0.562$ .

$$K_a = 1200 \pm 400 \text{ M}^{-1} \quad \quad \quad 68\% \text{ bound}$$

## Titration Curves for Phosphine Oxide in Acetonitrile.

a) Titration of phosphine oxide with phenol in acetonitrile

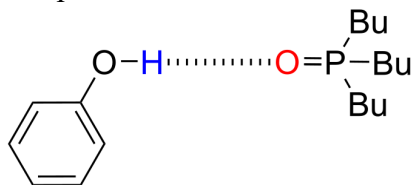

Host: phosphine oxide = 5.5 mM

Guest: phenol = 247 mM

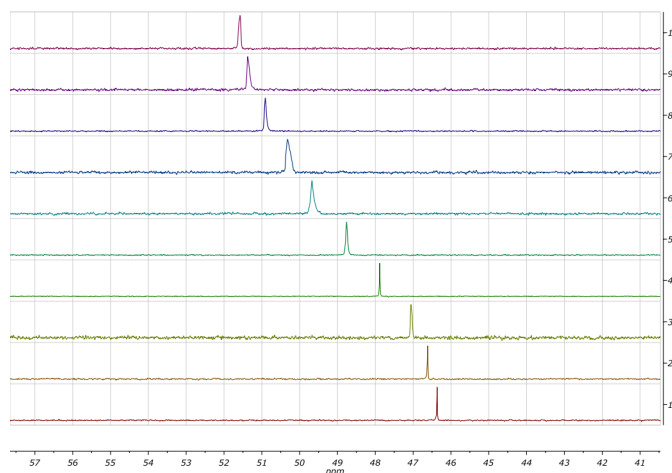

Graph S137.  $^{31}\text{P}$ -NMR spectra of titration of phenol with phosphine oxide in acetonitrile.

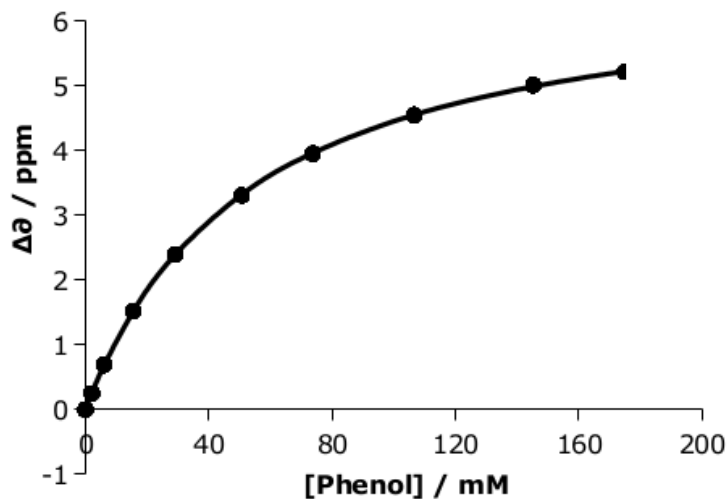

Graph S138. Binding isotherms for titration using 1:1 fitting program for titration of phenol against phosphine oxide in acetonitrile. [phosphine oxide] = 5.5 mM and [phenol] = 247 mM,  $\Delta\text{ppm} = 5.21$ .

$$K_a = 20 \pm 1 \text{ M}^{-1} \quad 78 \% \text{ bound}$$

b) Titration of phosphine oxide with 5-nitroindole in acetonitrile

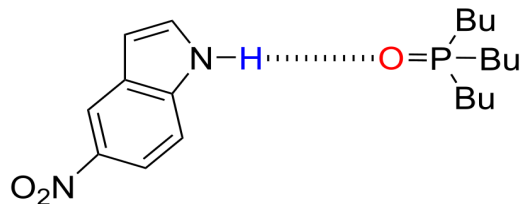

Host: phosphine oxide = 5.5 mM

Guest: 5-nitroindole = 480 Mm

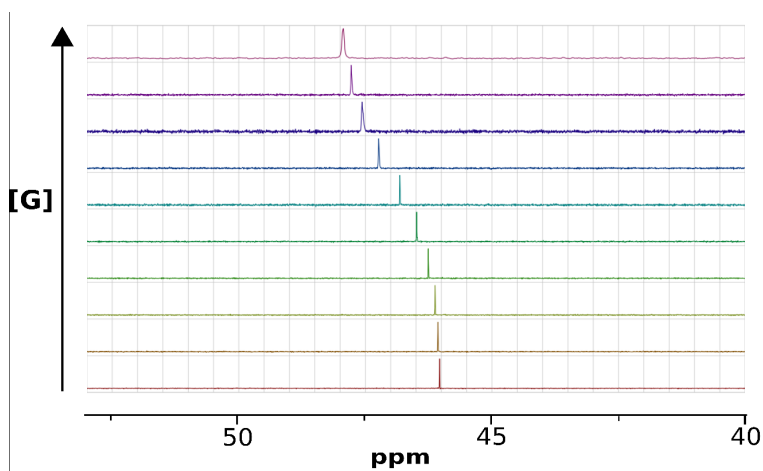

Graph S 39.  $P^{31}$ -NMR spectra of titration of 5-nitroindole with phosphine oxide in acetonitrile.

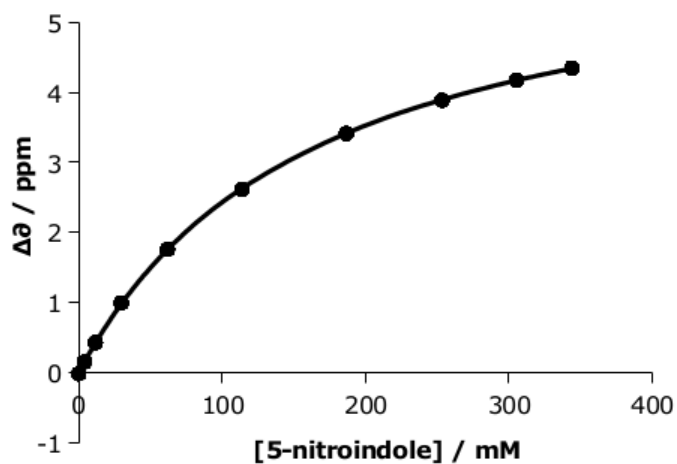

Graph S140. Binding isotherms for titration using 1:1 fitting program for titration of 5-nitroindole against phosphine oxide in acetonitrile. [phosphine oxide] = 5.5 mM and [5-nitroindole] = 480 mM,  $\Delta\text{ppm} = 4.53$ .

$$K_a = 6 \pm 1 \text{ M}^{-1}$$

**68% bound**



c) Titration of phosphine oxide with 4-phenylazophenol in acetonitrile

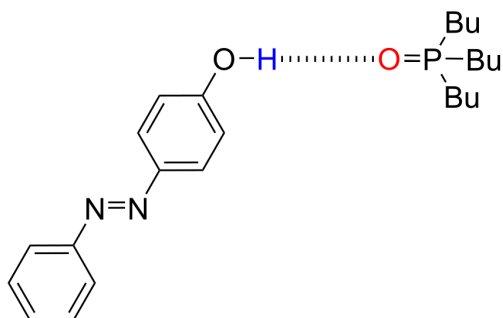

Host: phosphine oxide = 4.5 mM

Guest: 4-phenylazophenol = 70 mM

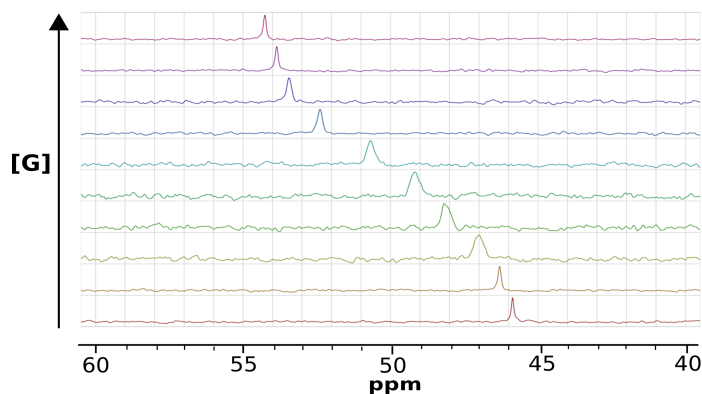

Graph S141.  $^{31}\text{P}$ -NMR spectra of titration of 4-phenylazophenol with phosphine oxide in acetonitrile.

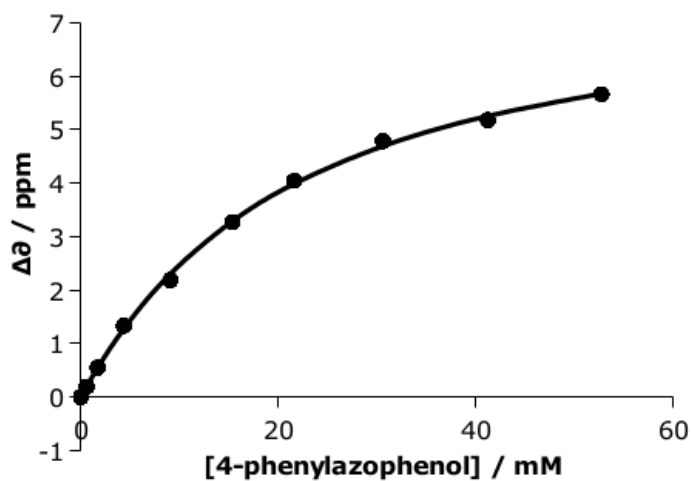

Graph S142. Binding isotherms for titration using 1:1 fitting program for titration of phenol against phosphine oxide in acetonitrile. [phosphine oxide] = 4.5 mM and [4-phenylazophenol] = 70 mM,  $\Delta\text{ppm} = 5.66$ .

$$K_a = 58 \pm 4 \text{ M}^{-1} \quad 74\% \text{ bound}$$

d) Titration of phosphine oxide with 4-nitrophenol in acetonitrile

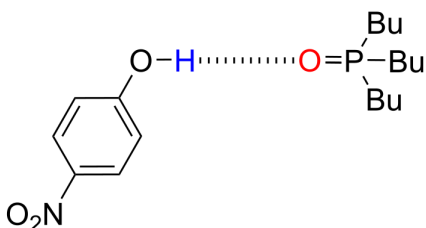

Host: phosphine oxide = 5.7 mM

Guest: 4-nitrophenol = 102 mM

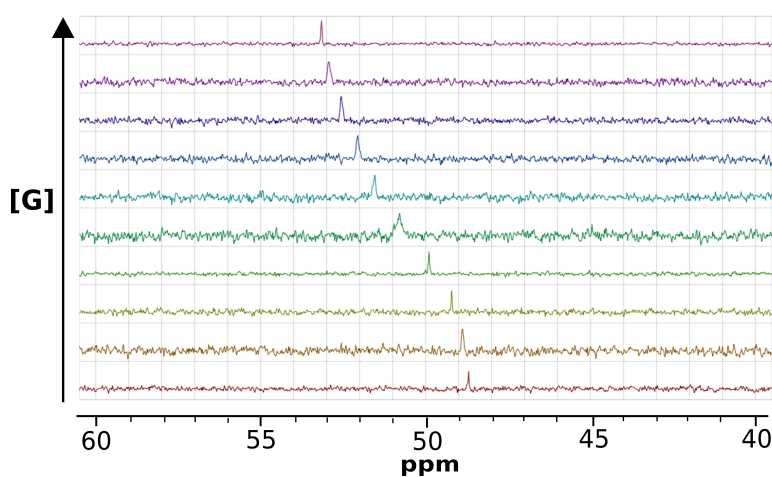

Graph S143.  $^{31}\text{P}$ -NMR spectra of titration of 4-nitrophenol with phosphine oxide in acetonitrile.

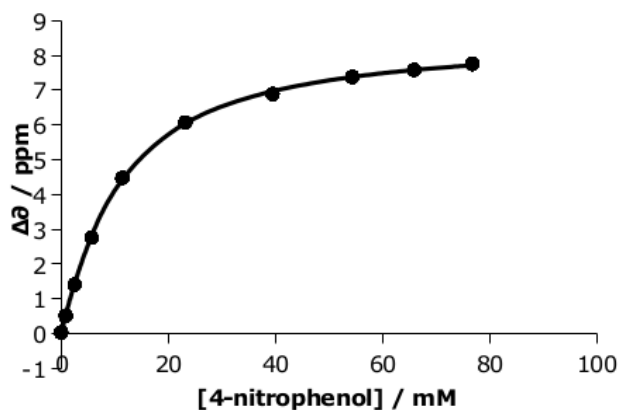

Graph S144. Binding isotherms for titration using 1:1 fitting program for titration of 4-nitrophenol against phosphine oxide in acetonitrile. [phosphine oxide] = 5.7 mM and [4-nitrophenol] = 102 mM,  $\Delta\text{ppm} = 7.08$ .

$$K_a = 102 \pm 34 \text{ M}^{-1} \quad 73\% \text{ bound}$$

e) Titration of phosphine oxide with 4-nitro,3-fluoromethylphenol in acetonitrile

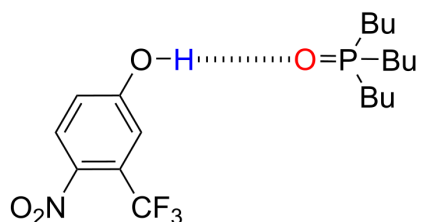

Host: phosphine oxide = 5.0 mM

Guest: 4-nitro,3-fluoromethylphenol = 52 mM

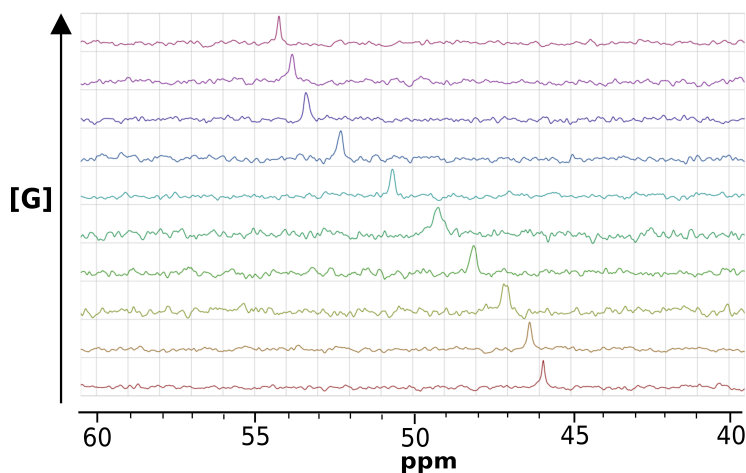

Graph S145.  $^{31}\text{P}$ -NMR spectra of titration of 4-nitro,3-fluoromethylphenol with phosphine oxide in acetonitrile.

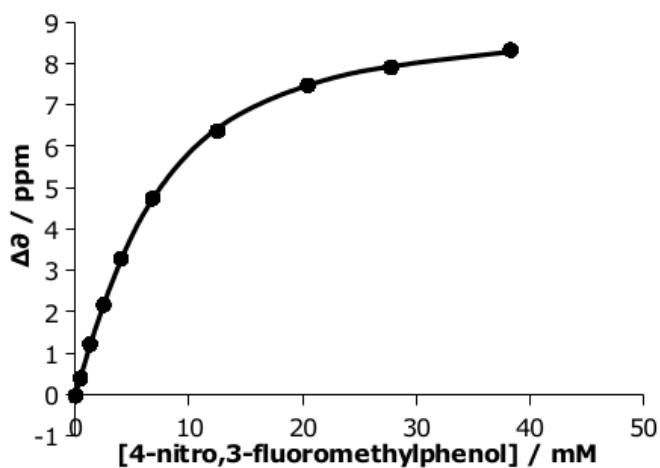

Graph S146. Binding isotherms for titration using 1:1 fitting program for titration of phenol against phosphine oxide in acetonitrile. [phosphine oxide] = 5.0 mM and [4-nitro,3-fluoromethylphenol] = 52 mM,  $\Delta\text{ppm} = 8.32$ .

$$K_a = 266 \pm 22 \text{ M}^{-1}$$

90% bound

g) Titration of phosphine oxide with AgBF<sub>4</sub> in acetonitrile

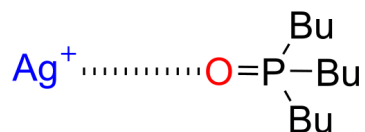

Host: phosphine oxide = 5.6 mM

Guest: AgBF<sub>4</sub> = 310 mM

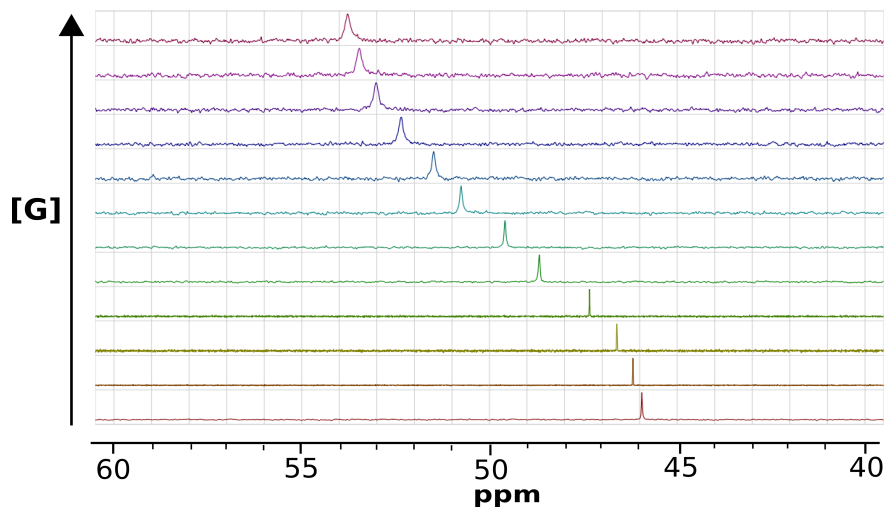

Graph S147. P<sup>31</sup>-NMR spectra of titration of AgBF<sub>4</sub> with phosphine oxide in acetonitrile.

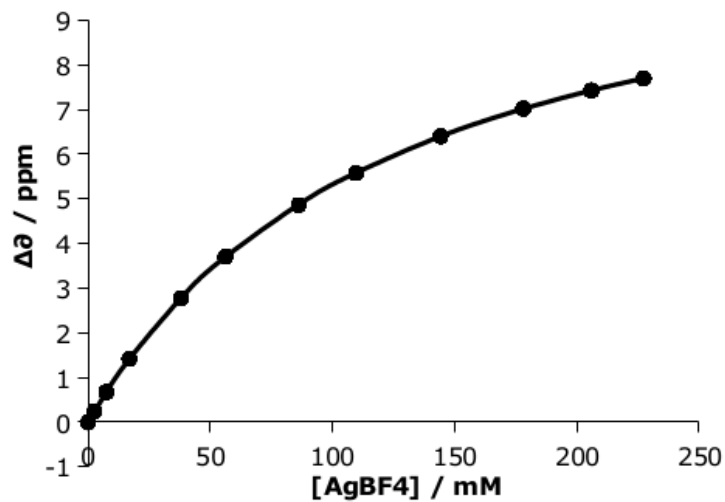

Graph S148. Binding isotherms for titration using 1:1 fitting program for titration of AgBPh<sub>4</sub> against phosphine oxide in acetonitrile. [phosphine oxide] = 5.6 mM and [ AgBF<sub>4</sub> ] = 310 mM, Δppm = 7.84 .

$$K_a = 8 \pm 1 \text{ M}^{-1} \quad 65 \% \text{ bound}$$

h) Titration of phosphine oxide with GuanidiniumBPh<sub>4</sub> in acetonitrile

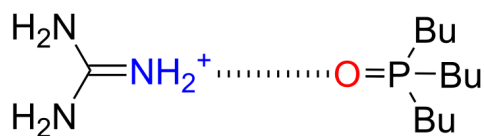

Host: phosphine oxide = 5.1 mM

Guest: GuanidiniumBPh<sub>4</sub> = 35 mM

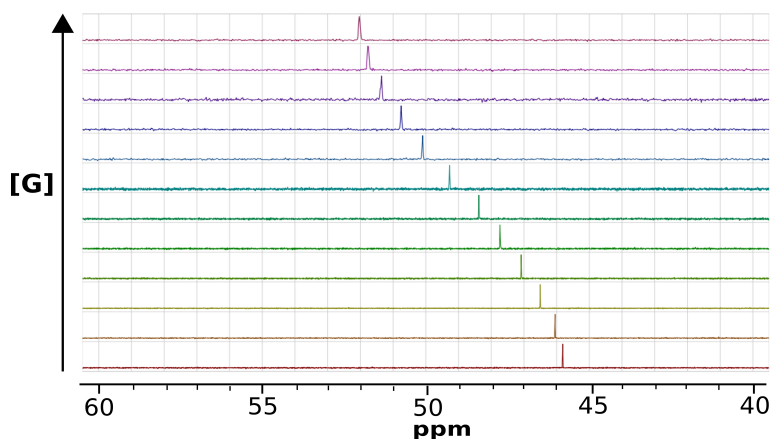

Graph S149. <sup>31</sup>P-NMR spectra of titration of GuanidiniumBPh<sub>4</sub> with phosphine oxide in acetonitrile.

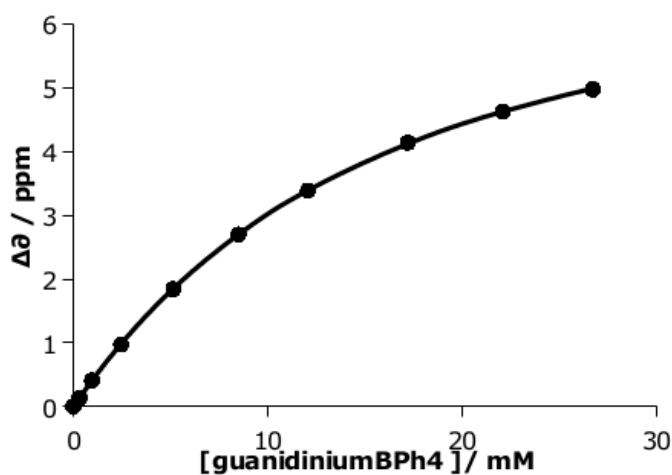

Graph S150. Binding isotherms for titration using 1:1 fitting program for titration of GuanidiniumBPh<sub>4</sub> against phosphine oxide in acetonitrile. [phosphine oxide] = 5.1 mM and [ 4-GuanidiniumBPh<sub>4</sub>] = 35 mM, Δppm = 6.22 .

$$K_a = 198 \pm 61 \text{ M}^{-1} \quad 85 \% \text{ bound}$$

i) Titration of phosphine oxide with Et<sub>3</sub>NHBPh<sub>4</sub> in acetonitrile

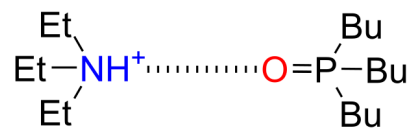

Host: phosphine oxide = 5.0 mM

Guest: Et<sub>3</sub>NHBPh<sub>4</sub> = 39 mM

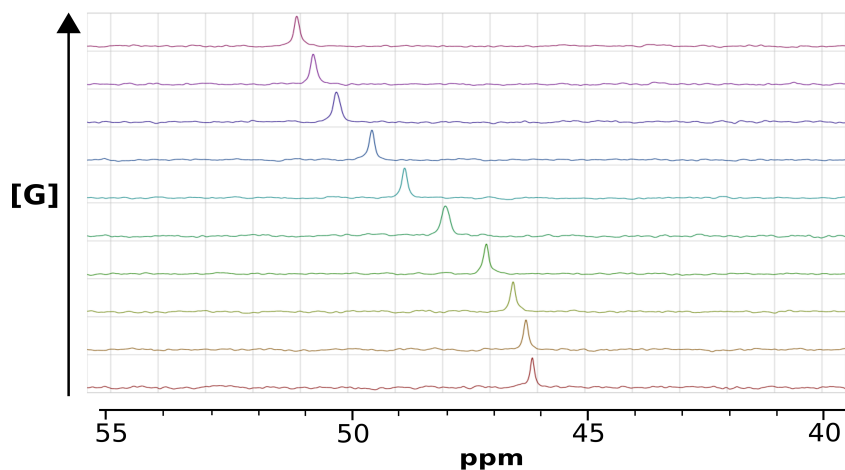

Graph S151. <sup>31</sup>P-NMR spectra of titration of Et<sub>3</sub>NHBPh<sub>4</sub> with phosphine oxide in acetonitrile.

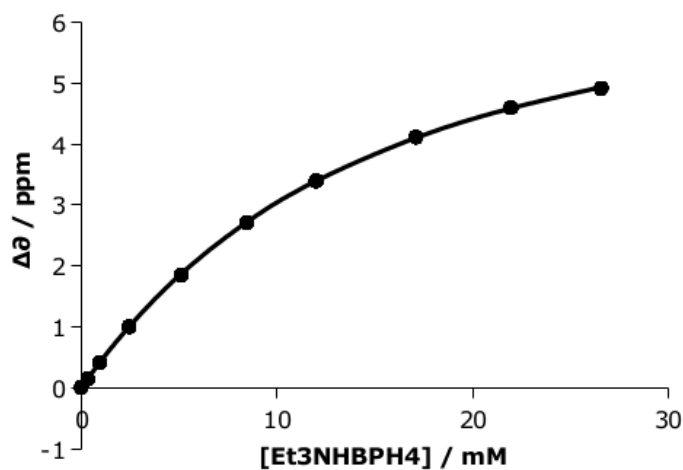

Graph S152. Binding isotherms for titration using 1:1 fitting program for titration of Et<sub>3</sub>NHBPh<sub>4</sub> against phosphine oxide in acetonitrile. [phosphine oxide] = 5.0 mM and [ Et<sub>3</sub>NHBPh<sub>4</sub> ] = 39 mM, Δppm = 4.91.

$$K_a = 85 \pm 6 \text{ M}^{-1} \quad \quad 66 \% \text{ bound}$$

j) Titration of phosphine oxide with 1-MethylimidazoliumBPh<sub>4</sub> in acetonitrile

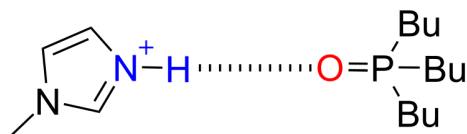

Host: phosphine oxide = 5.0 mM

Guest: 1-MethylimidazoliumBPh<sub>4</sub> = 40 mM

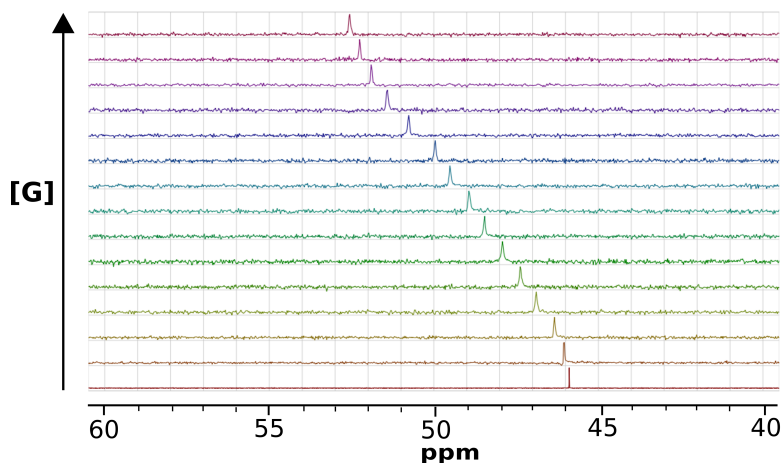

Graph S153. <sup>31</sup>P-NMR spectra of titration of 1-MethylimidazoliumBPh<sub>4</sub> with phosphine oxide in acetonitrile.

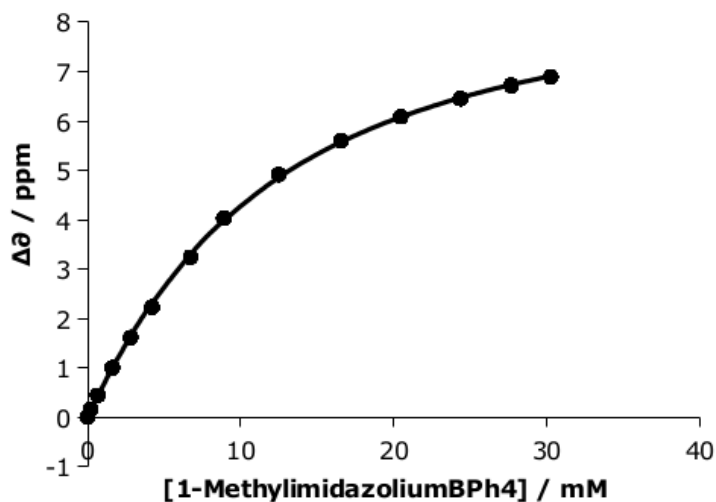

Graph S154. Binding isotherms for titration using 1:1 fitting program for titration of 1-MethylimidazoliumBPh<sub>4</sub> against phosphine oxide in acetonitrile. [phosphine oxide] = 5.0 mM and [ 1-MethylimidazoliumBPh<sub>4</sub> ] = 40 mM, Δppm = 6.89 .

$$K_a = 102 \pm 12 \text{ M}^{-1} \quad 75\% \text{ bound}$$

k) Titration of phosphine oxide with 2-EthylhexylammoniumBPh<sub>4</sub> in acetonitrile

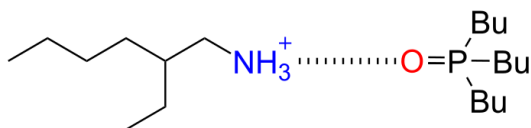

Host: phosphine oxide = 5.7 mM

Guest: 2-EthylhexylammoniumBPh<sub>4</sub> = 50 mM

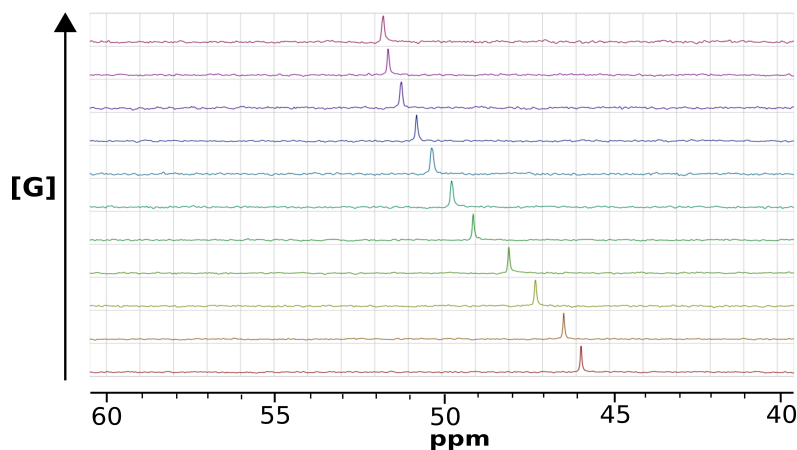

Graph S155. P<sup>31</sup>-NMR spectra of titration of 2-EthylhexylammoniumBPh<sub>4</sub> with phosphine oxide in acetonitrile.

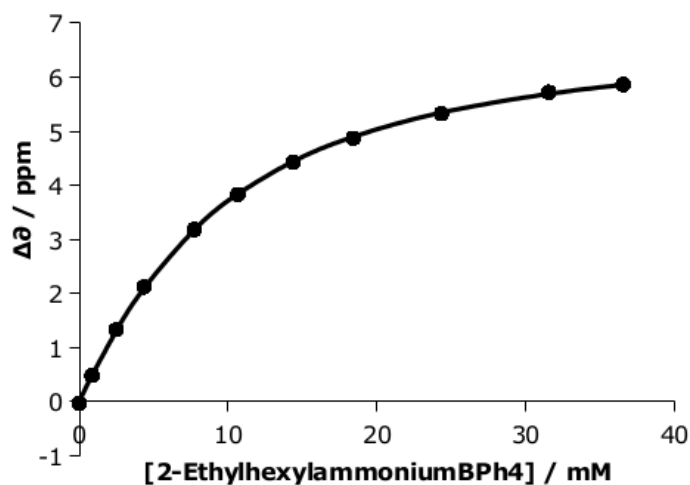

Graph S156. Binding isotherms for titration using 1:1 fitting program for titration of 2-EthylhexylammoniumBPh<sub>4</sub> against phosphine oxide in acetonitrile. [phosphine oxide] = 5.7 mM and [ 2-EthylhexylammoniumBPh<sub>4</sub>] = 50 mM, Δppm = 5.90 .

$$K_a = 147 \pm 25 \text{ M}^{-1} \quad 78 \% \text{ bound}$$



1) Titration of phosphine oxide with  $\text{IPh}_2\text{BF}_4$  in acetonitrile

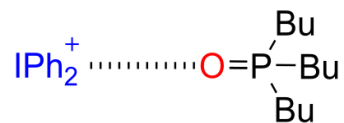

Host: phosphine oxide = 5.3 mM

Guest:  $\text{IPh}_2\text{BF}_4$  = 48 mM

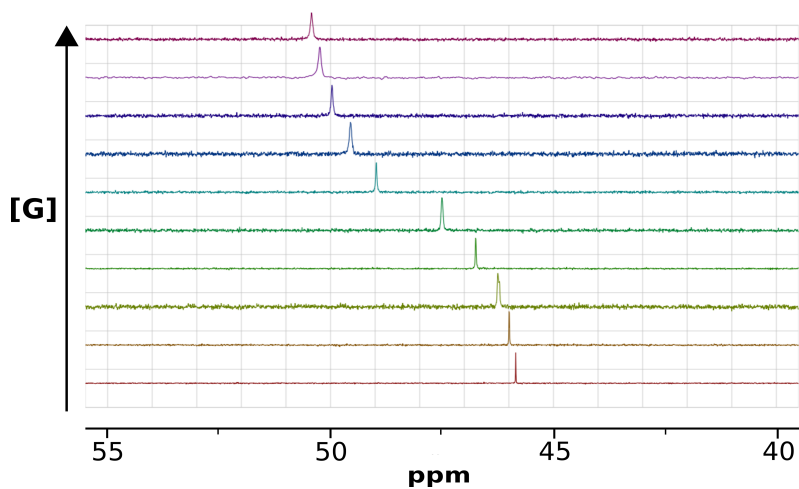

Graph S157.  $^{31}\text{P}$ -NMR spectra of titration of  $\text{IPh}_2\text{BF}_4$  with phosphine oxide in acetonitrile.

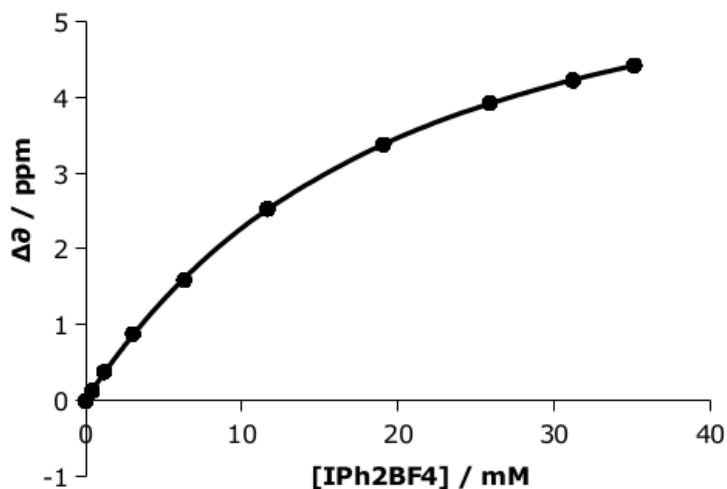

Graph S158. Binding isotherms for titration using 1:1 fitting program for titration of  $\text{IPh}_2\text{BF}_4$  against phosphine oxide in acetonitrile.  $[\text{phosphine oxide}] = 5.3 \text{ mM}$  and  $[\text{IPh}_2\text{BF}_4] = 48 \text{ mM}$ ,  $\Delta\text{ppm} = 4.43$ .

$$K_a = 62 \pm 3 \text{ M}^{-1} \quad 67 \% \text{ bound}$$

m) Titration of phosphine oxide with TriphenylmethylPF<sub>6</sub> in acetonitrile

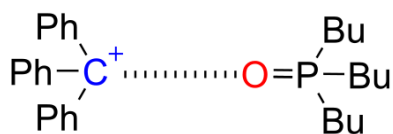

Host: phosphine oxide = 5.2 mM

Guest: TriphenylmethylPF<sub>6</sub> = 54 mM

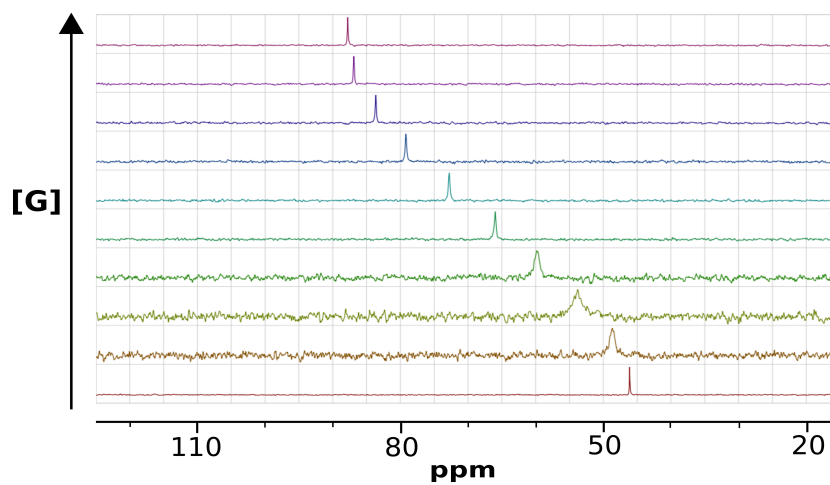

*Graph S159.* <sup>31</sup>P-NMR spectra of titration of TriphenylmethylPF<sub>6</sub> with phosphine oxide in acetonitrile.

n) Titration of phosphine oxide with NaBF<sub>4</sub> in acetonitrile

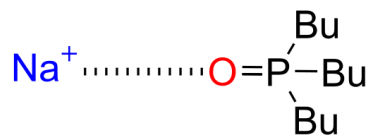

Host: phosphine oxide = 5.70 mM

Guest: NaBF<sub>4</sub> = 57 mM

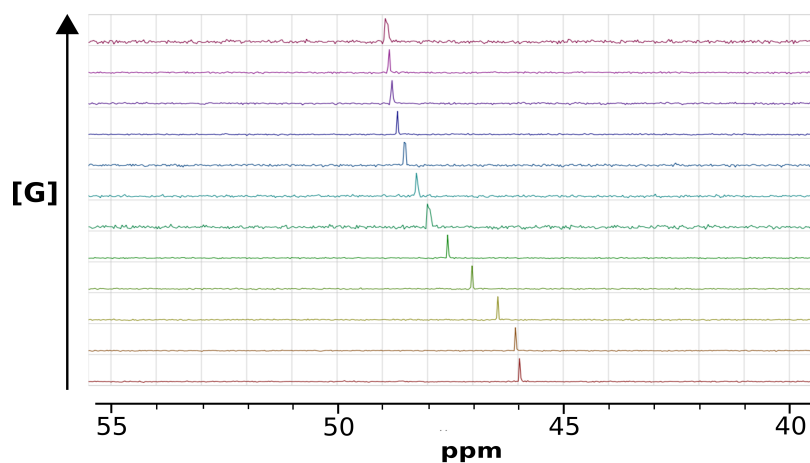

Graph S160. <sup>31</sup>P-NMR spectra of titration of NaBF<sub>4</sub> with phosphine oxide in acetonitrile.

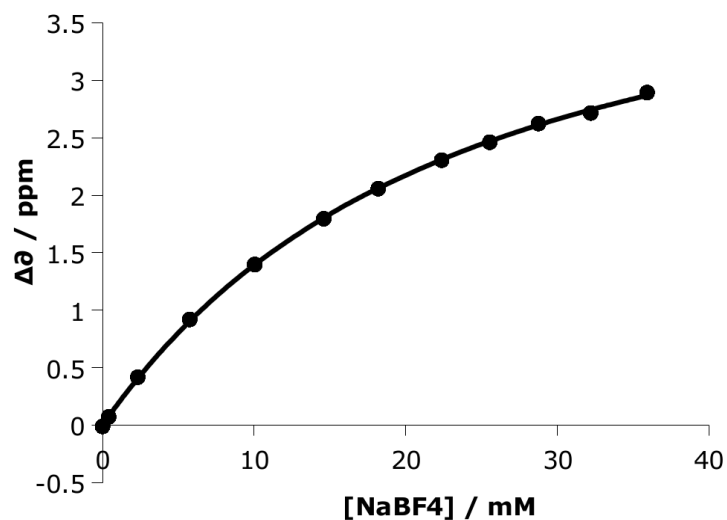

Graph S161. Binding isotherms for titration using 1:1 fitting program for titration of 1-NaBF<sub>4</sub> against phosphine oxide in acetonitrile. [phosphine oxide] = 5.7 mM and [NaBF<sub>4</sub>] = 57 mM, Δppm = 2.98.

$$K_a = 57 \pm 6 \text{ M}^{-1} \quad 68 \% \text{ bound}$$

o) Titration of phosphine oxide with NaBAr<sup>F</sup> in acetonitrile



Host: phosphine oxide = 5.2 mM

Guest: NaBAr<sup>F</sup> = 50 mM

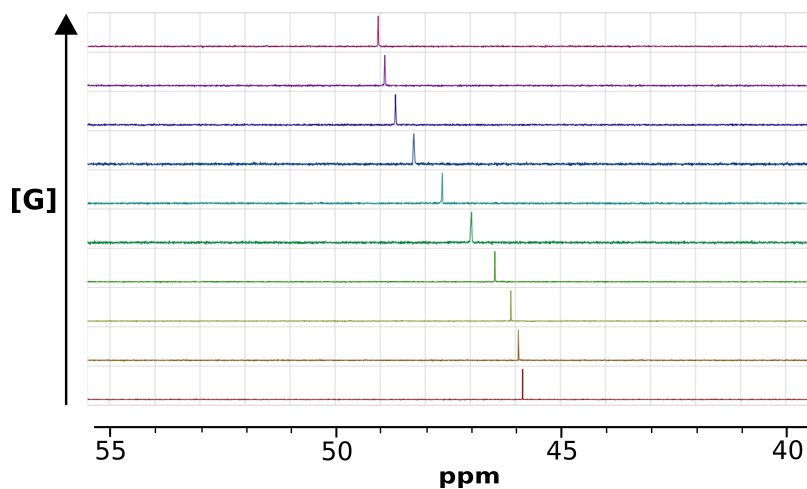

Graph S162. <sup>31</sup>P-NMR spectra of titration of NaBAr<sup>F</sup> with phosphine oxide in acetonitrile.

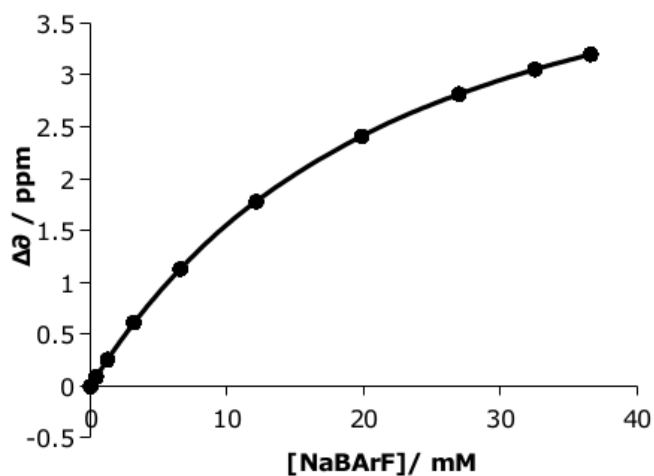

Graph S163. Binding isotherms for titration using 1:1 fitting program for titration of NaBAr<sup>F</sup> against phosphine oxide in acetonitrile. [phosphine oxide] = 5.2 mM and [NaBAr<sup>F</sup>] = 50 mM, Δppm = 3.2 .

$$K_a = 53 \pm 3 \text{ M}^{-1} \quad 64 \% \text{ bound}$$

p) Titration of phosphine oxide with  $\text{NaN}(\text{SO}_2\text{CF}_3)_2$  in acetonitrile



Host: phosphine oxide = 5.2 mM

Guest:  $\text{NaN}(\text{SO}_2\text{CF}_3)_2$  = 49 mM

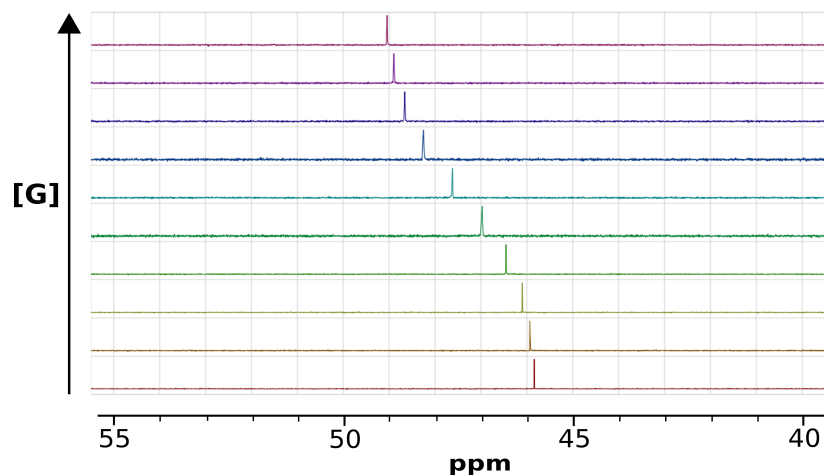

Graph S164.  $^{31}\text{P}$ -NMR spectra of titration of  $\text{NaN}(\text{SO}_2\text{CF}_3)_2$  with phosphine oxide in acetonitrile.

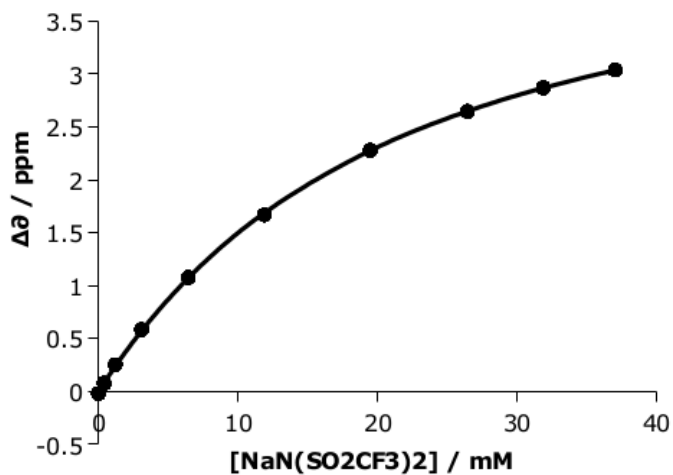

Graph S165. Binding isotherms for titration using 1:1 fitting program for titration of  $\text{NaN}(\text{SO}_2\text{CF}_3)_2$  against phosphine oxide in acetonitrile. [phosphine oxide] = 4.9 mM and  $[\text{NaN}(\text{SO}_2\text{CF}_3)_2] = 49$  mM,  $\Delta\text{ppm} = 3.05$ .

$$K_a = 56 \pm 5 \text{ M}^{-1} \quad 66 \% \text{ bound}$$

q) Titration of phosphine oxide with NaI in acetonitrile

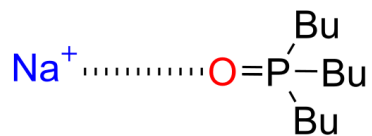

Host: phosphine oxide = 5.2 mM

Guest: NaI = 49 mM

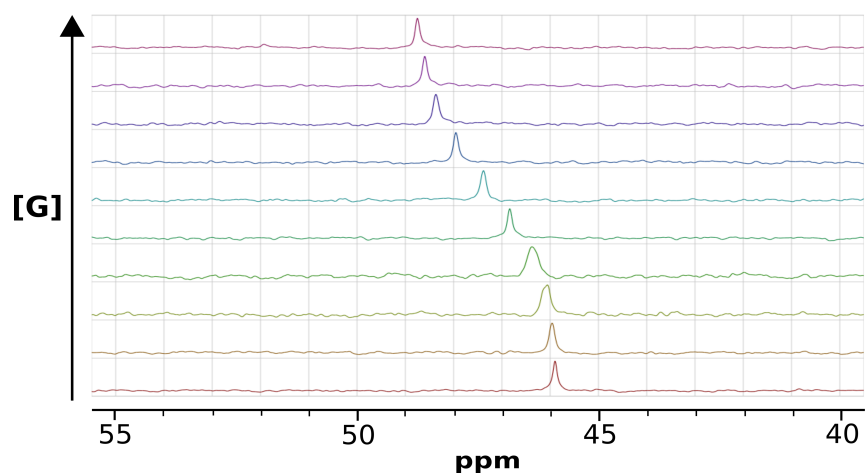

Graph S166.  $^{31}\text{P}$ -NMR spectra of titration of NaI with phosphine oxide in acetonitrile.

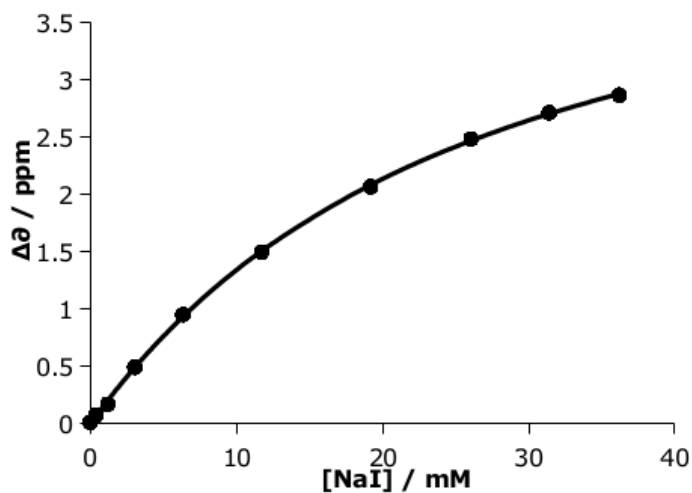

Graph S167. Binding isotherms for titration using 1:1 fitting program for titration of NaI against phosphine oxide in acetonitrile. [phosphine oxide] = 5.2 mM and [NaI] = 49 mM,  $\Delta\text{ppm} = 2.85$ .

$$K_a = 45 \pm 1 \text{ M}^{-1} \quad 60 \% \text{ bound}$$

## Titration Curves for Phosphine Oxide in Acetone.

### a) Titration of phosphine oxide with phenol in acetone

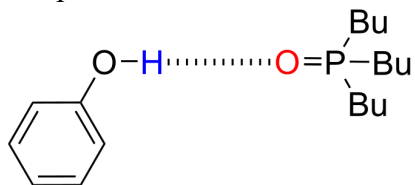

Host: phosphine oxide = 5.00 mM

Guest: = 253 phenol mM

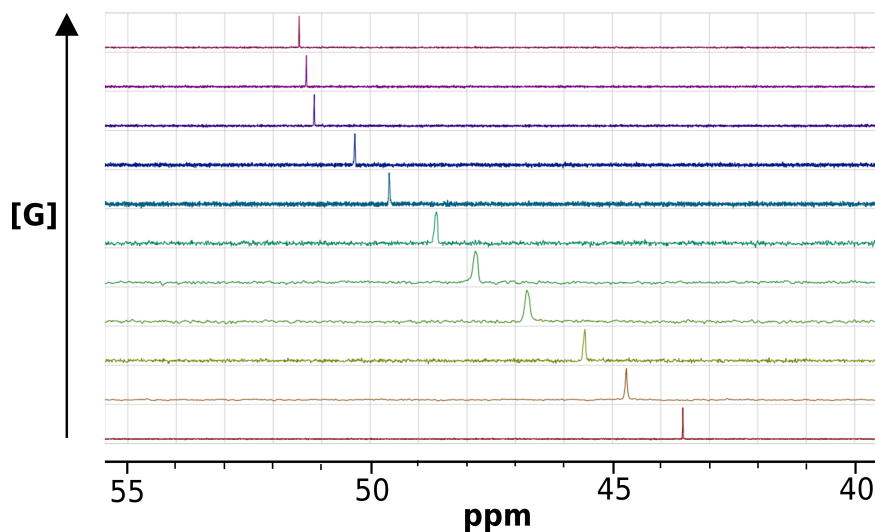

Graph S168.  $^{31}\text{P}$ -NMR spectra of titration of phenol with phosphine oxide in acetonitrile.

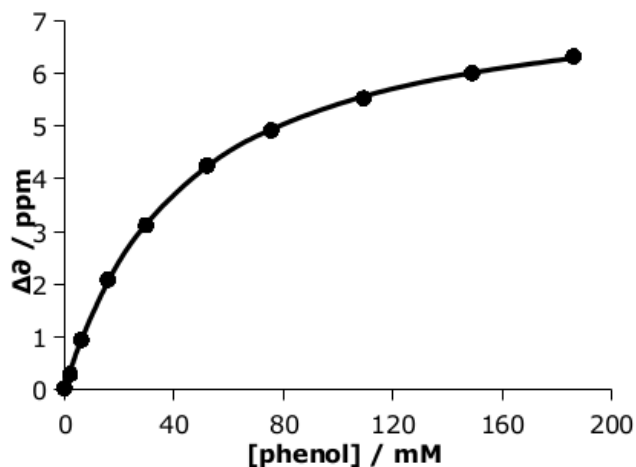

Graph S169. Binding isotherms for titration using 1:1 fitting program for titration of phenol against phosphine oxide in acetonitrile. [phosphine oxide] = 5.00 mM and [phenol] = 253 mM,  $\Delta\text{ppm} = 6.29$ .

$$K_a = 26 \pm 1 \text{ M}^{-1} \quad \% \text{ bound}$$

b) Titration of phosphine oxide with 5-nitroindole in acetone



Host: phosphine oxide = 5.2 mM

Guest: 5-nitroindole = 501 mM

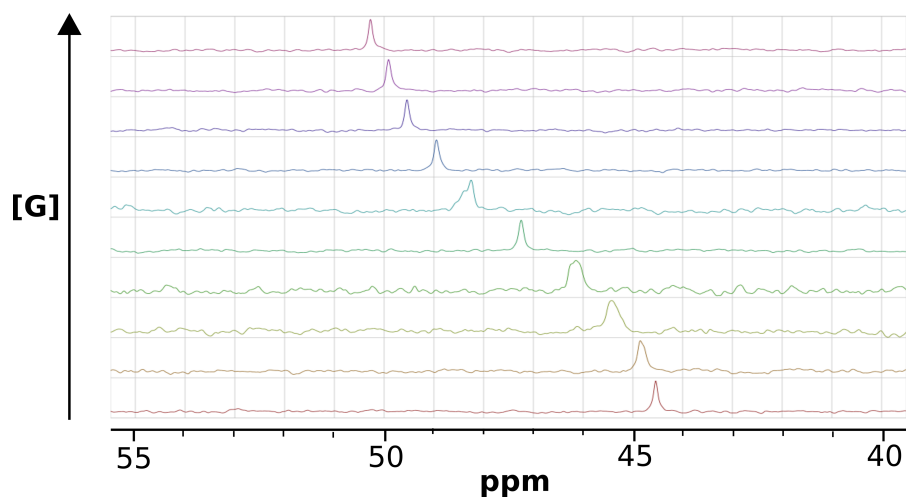

Graph S170.  $^{31}\text{P}$ -NMR spectra of titration of 5-nitroindole with phosphine oxide in acetonitrile.

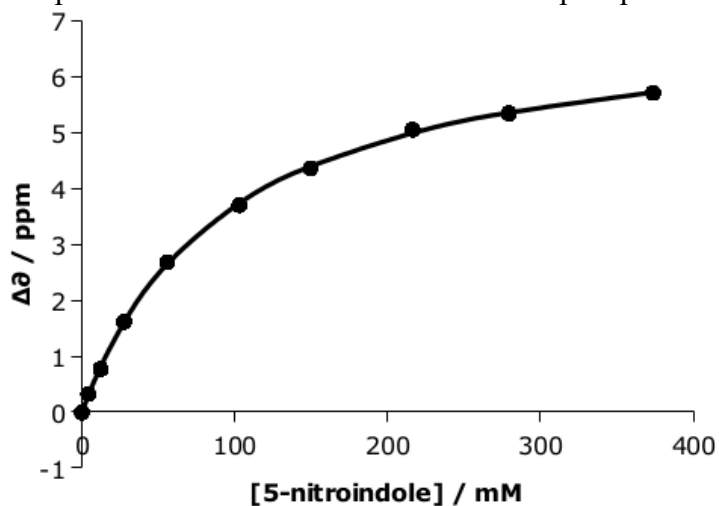

Graph S171. Binding isotherms for titration using 1:1 fitting program for titration of 5-nitroindole against phosphine oxide in acetonitrile.  $[\text{phosphine oxide}] = 5.2 \text{ mM}$  and  $[\text{5-nitroindole}] = 501 \text{ mM}$ ,  $\Delta\text{ppm} = 5.63$ .

$$K_a = 11 \pm 1 \text{ M}^{-1} \quad 80 \% \text{ bound}$$



c) Titration of phosphine oxide with 4-phenylazophenol in acetone

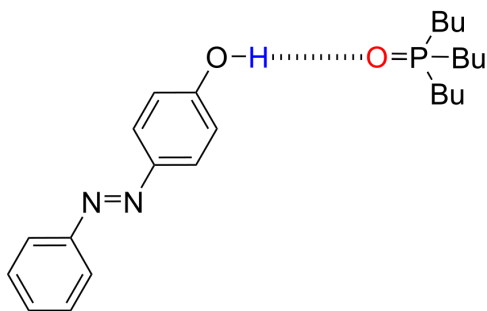

Host: phosphine oxide = 5.6 mM

Guest: 4-phenylazophenol = 73 mM

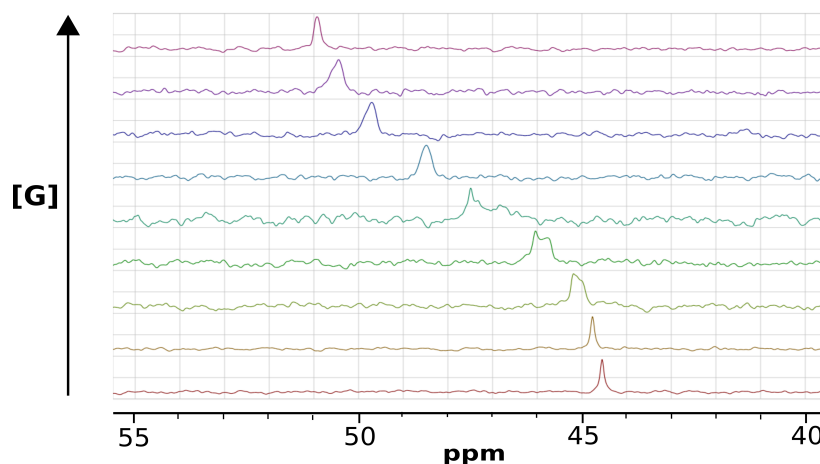

Graph S172.  $^{31}\text{P}$ -NMR spectra of titration of 4-phenylazophenol with phosphine oxide in acetone.

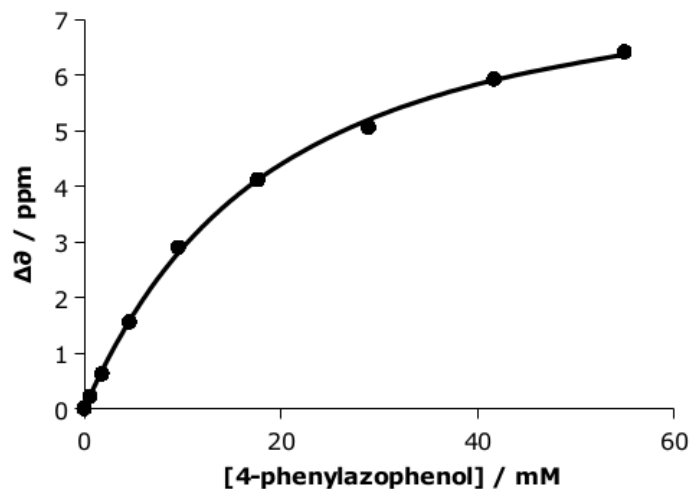

Graph S173. Binding isotherms for titration using 1:1 fitting program for titration of against phosphine oxide in acetone. [phosphine oxide] = 5.6 mM and [4-phenylazophenol] = 73 mM,  $\Delta\text{ppm} = 6.15$ .

$$K_a = 65 \pm 6 \text{ M}^{-1} \quad 76\% \text{ bound}$$

d) Titration of phosphine oxide with 4-nitrophenol in acetone

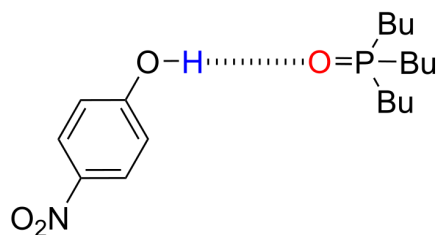

Host: phosphine oxide = 5.2 mM

Guest: 4-nitrophenol = 99 mM

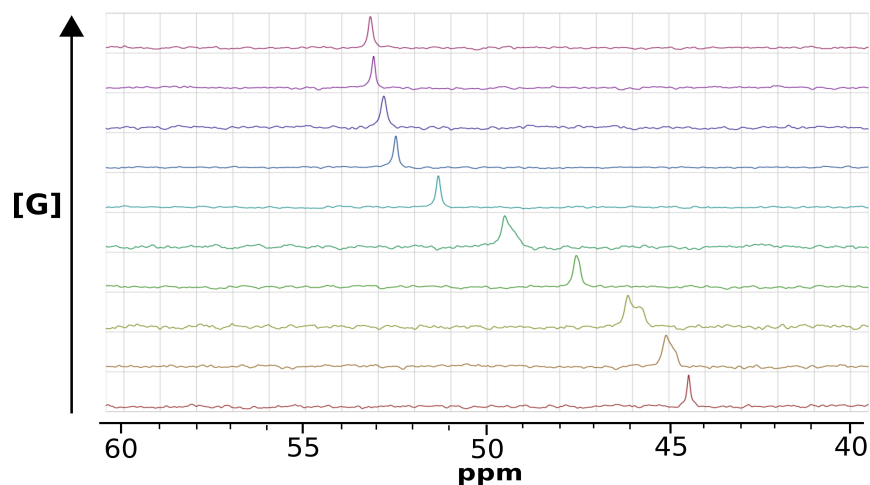

Graph S174.  $^{31}\text{P}$ -NMR spectra of titration of 4-nitrophenol with phosphine oxide in acetone.

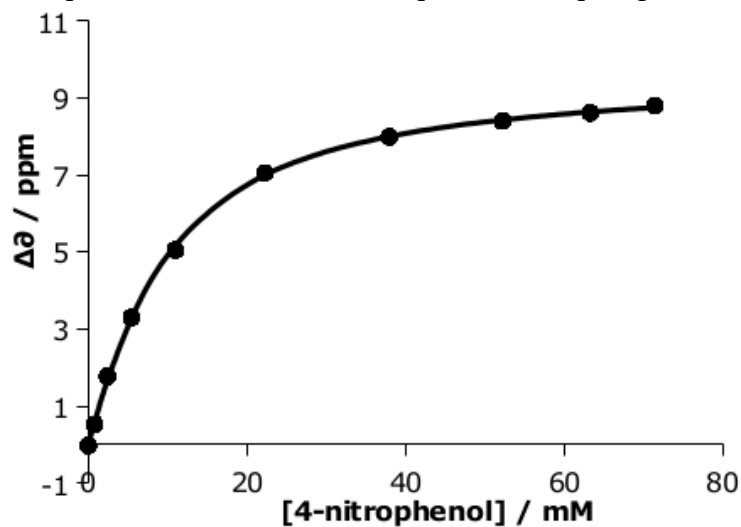

Graph S175. Binding isotherms for titration using 1:1 fitting program for titration of 4-nitrophenol against phosphine oxide in acetone. [phosphine oxide] = 5.2 mM and [4-nitrophenol] = 99 mM,  $\Delta\text{ppm} = 8.76$ .

$$K_a = 134 \pm 18 \text{ M}^{-1} \quad 89 \% \text{ bound}$$

e) Titration of phosphine oxide with 4-nitro,3-trifluoromethylphenol in acetone

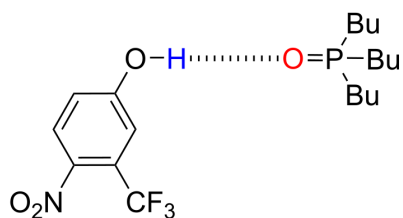

Host: phosphine oxide = 5.0 mM

Guest: 4-nitro,3-trifluoromethylphenol = 48 mM

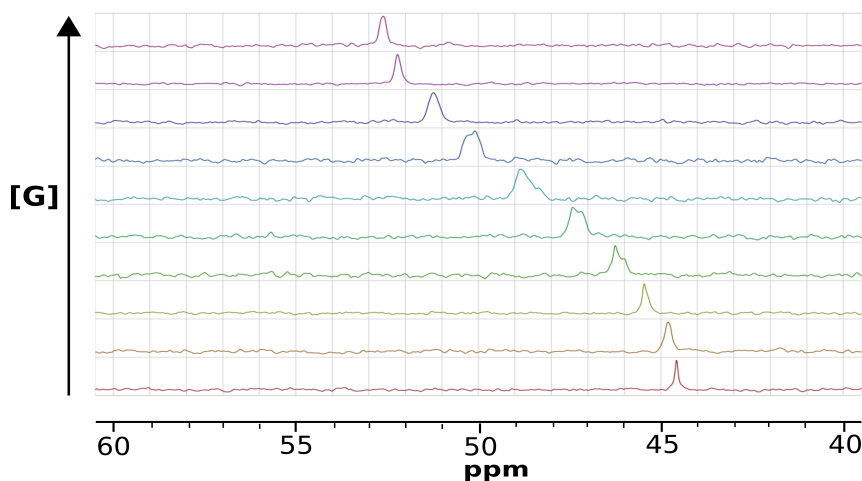

Graph S176.  $^{31}\text{P}$ -NMR spectra of titration of 4-nitro,3-trifluoromethylphenol with phosphine oxide in acetone.

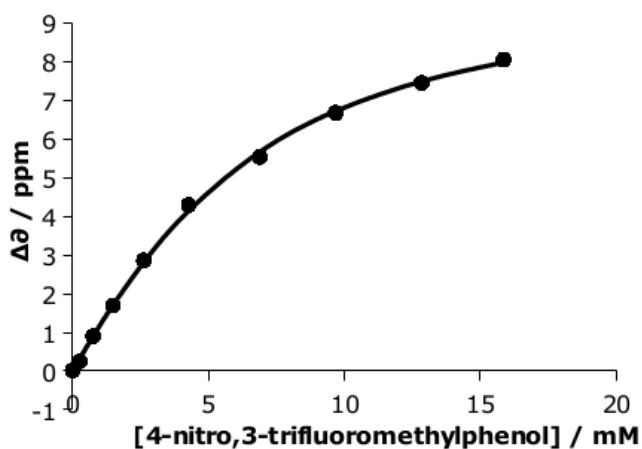

Graph S177. Binding isotherms for titration using 1:1 fitting program for titration of 4-nitro,3-trifluoromethylphenol against phosphine oxide in acetone. [phosphine oxide] = 5.0 mM and [4-nitro,3-trifluoromethylphenol] = 48 mM,  $\Delta\text{ppm} = 9.48$ .

$$K_a = 282 \pm 108 \text{ M}^{-1} \quad 90 \% \text{ bound}$$

f) Titration of phosphine oxide with NaBPh<sub>4</sub> in acetone



Host: phosphine oxide = 5.0 mM

Guest: NaBPh<sub>4</sub> = 51 mM

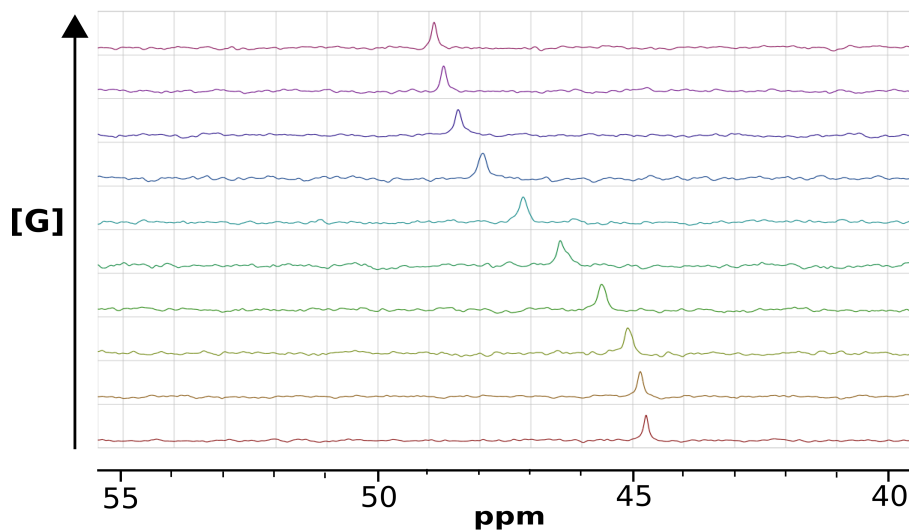

Graph S178. <sup>31</sup>P-NMR spectra of titration of NaBPh<sub>4</sub> with phosphine oxide in acetone.

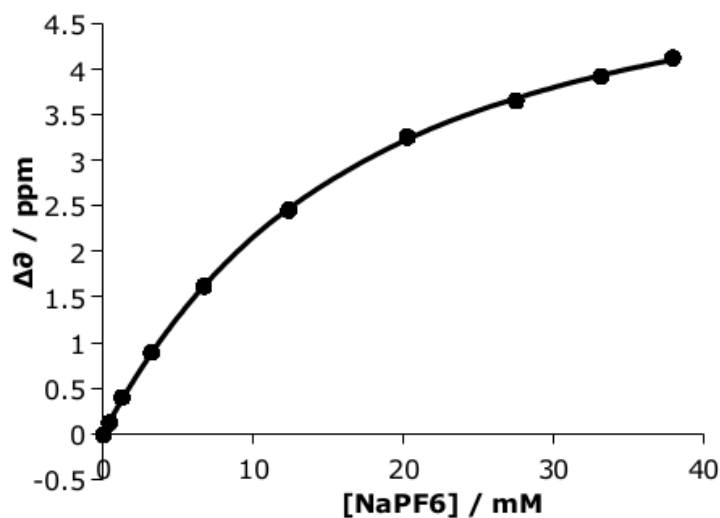

Graph S179. Binding isotherms for titration using 1:1 fitting program for titration of NaBPh<sub>4</sub> against phosphine oxide in acetone. [phosphine oxide] = 5.0 mM and [NaBPh<sub>4</sub>] = 51 mM, Δppm = 4.06.

$$K_a = 73 \pm 5 \text{ M}^{-1} \quad 71 \% \text{ bound}$$

g) Titration of phosphine oxide with  $\text{AgBF}_4$  in acetone

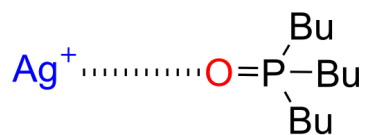

Host: phosphine oxide = 4.9 mM

Guest:  $\text{AgBF}_4$  = 80 mM

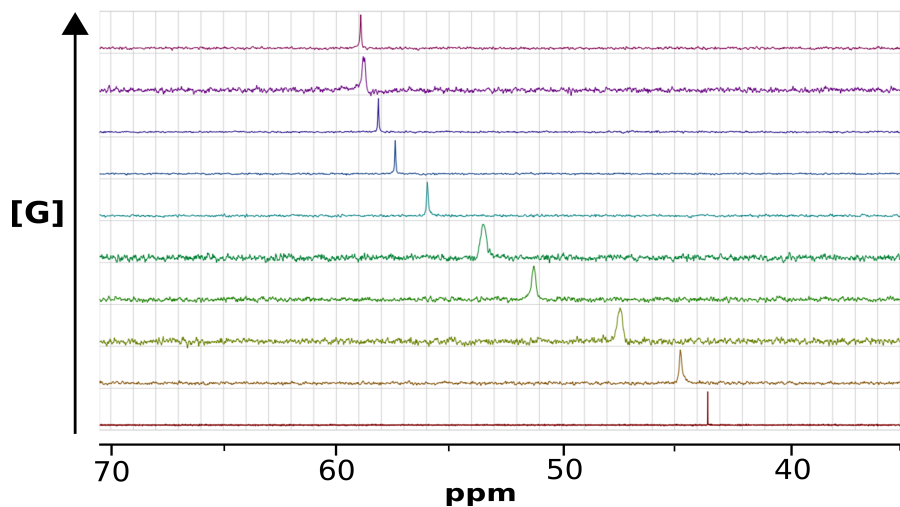

Graph S180.  $^{31}\text{P}$ -NMR spectra of titration of  $\text{AgBF}_4$  with phosphine oxide in acetonitrile.

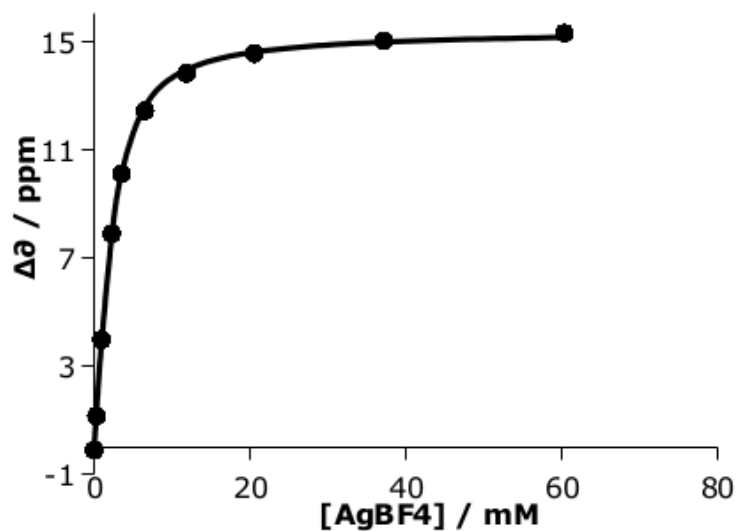

Graph S181. Binding isotherms for titration using 1:1 fitting program for titration of  $\text{AgBF}_4$  against phosphine oxide in acetonitrile.  $[\text{phosphine oxide}] = 4.9\text{mM}$  and  $[\text{AgBPh}_4] = 80\text{ mM}$ ,  $\Delta\text{ppm} = 15.4$ .

$$K_a = 966 \pm 40 \text{ M}^{-1} \quad 98 \% \text{ bound}$$

h) Titration of phosphine oxide with GuanidiniumBPh<sub>4</sub> in acetone

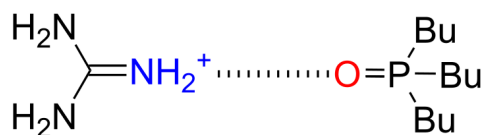

Host: phosphine oxide = 4.9 mM

Guest: GuanidiniumBPh<sub>4</sub> = 50 mM

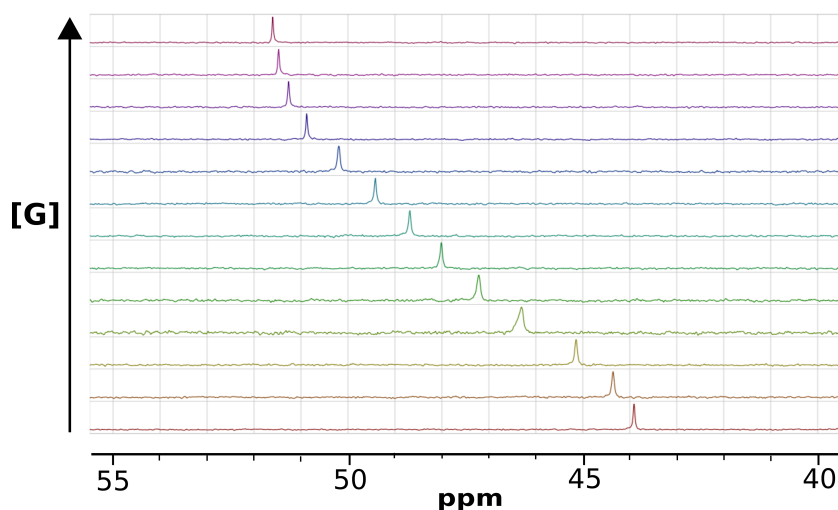

Graph S182. <sup>31</sup>P-NMR spectra of titration of GuanidiniumBPh<sub>4</sub> with phosphine oxide in acetone.

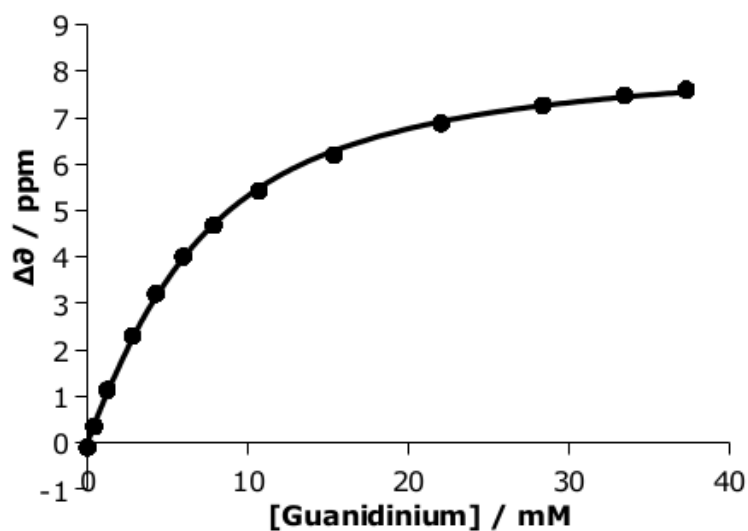

Graph S183. Binding isotherms for titration using 1:1 fitting program for titration of GuanidiniumBPh<sub>4</sub> against phosphine oxide in acetone. [phosphine oxide] = 4.9 mM and [GuanidiniumBPh<sub>4</sub>] = 50 mM, Δppm = 7.66 .

$$K_a = 225 \pm 40 \text{ M}^{-1} \quad 88 \% \text{ bound}$$

i) Titration of phosphine oxide with Et<sub>3</sub>NHBPh<sub>4</sub> in acetone

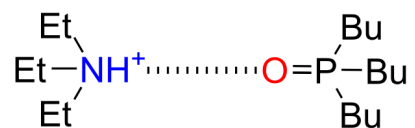

Host: phosphine oxide = 4.8 mM

Guest: Et<sub>3</sub>NHBPh<sub>4</sub> = 40 mM

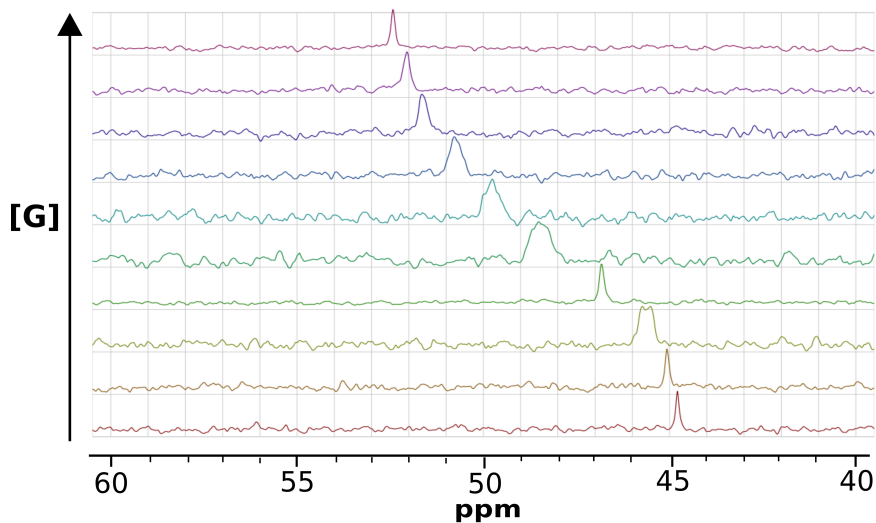

Graph S184. <sup>31</sup>P-NMR spectra of titration of Et<sub>3</sub>NHBPh<sub>4</sub> with phosphine oxide in acetone.

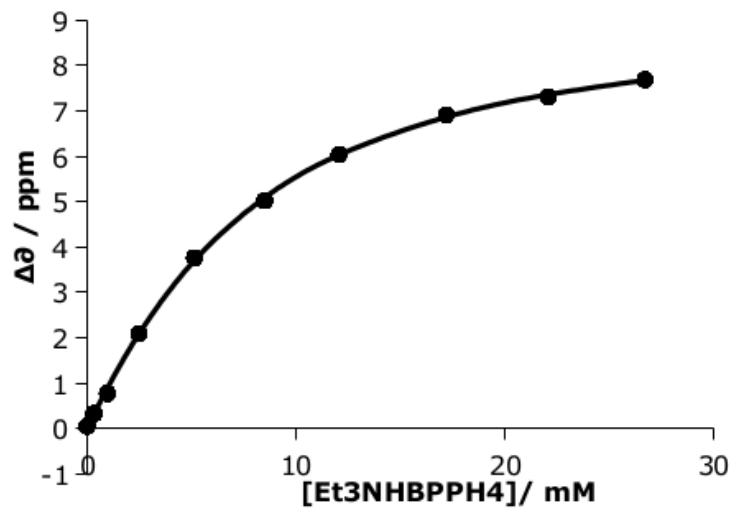

Graph S185. Binding isotherms for titration using 1:1 fitting program for titration of Et<sub>3</sub>NHBPh<sub>4</sub> against phosphine oxide in acetone. [phosphine oxide] = 4.8 mM and [Et<sub>3</sub>NHBPh<sub>4</sub>] = 40 mM, Δppm = 7.41.

$$K_a = 203 \pm 50 \text{ M}^{-1} \quad 80 \% \text{ bound}$$

j) Titration of phosphine oxide with 1-MethylimidazoliumBPh<sub>4</sub> in acetone

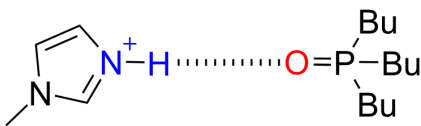

Host: phosphine oxide = 5.2 mM

Guest: 1-MethylimidazoliumBPh<sub>4</sub> = 40 mM

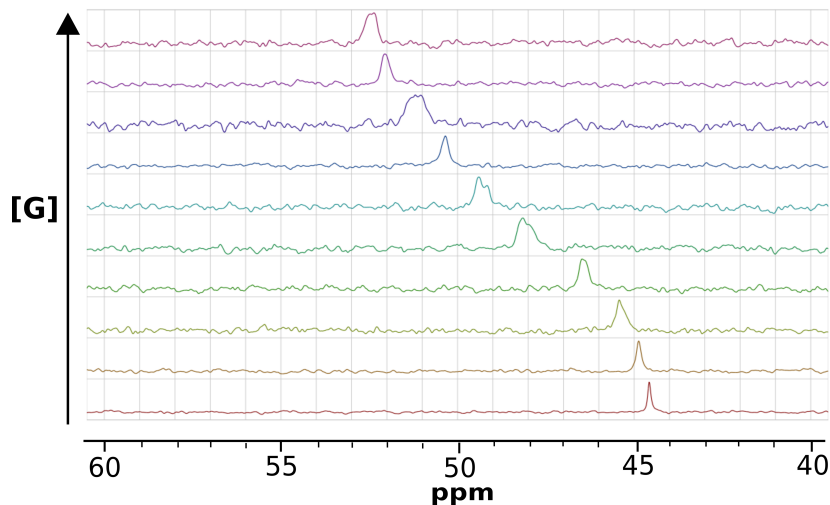

Graph S186. <sup>31</sup>P-NMR spectra of titration of 1-MethylimidazoliumBPh<sub>4</sub> with phosphine oxide in acetone.

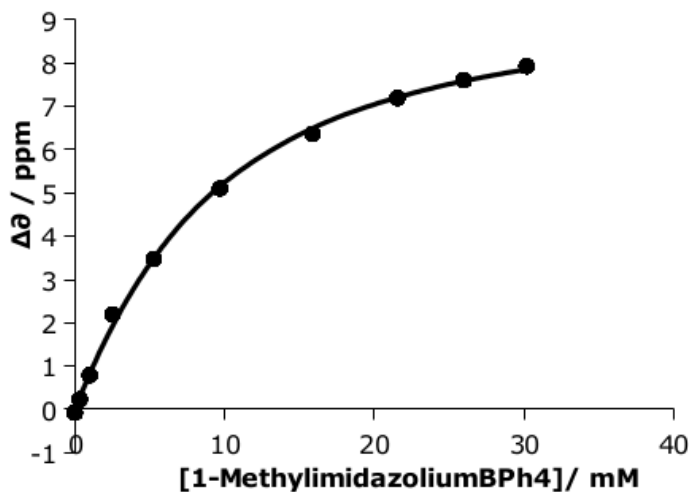

Graph S187. Binding isotherms for titration using 1:1 fitting program for titration of 1-MethylimidazoliumBPh<sub>4</sub> against phosphine oxide in acetone. [phosphine oxide] = 5.2 mM and [1-MethylimidazoliumBPh<sub>4</sub>] = 40 mM, Δppm = 7.96.

$$K_a = 156 \pm 18 \text{ M}^{-1} \quad 80 \% \text{ bound}$$



j) Titration of phosphine oxide with 2-EthylhexylammoniumBPh<sub>4</sub> in acetone

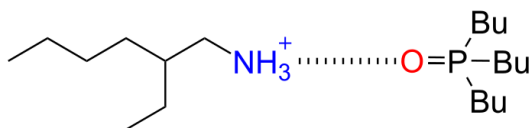

Host: phosphine oxide = 5.2 mM

Guest: 2-EthylhexylammoniumBPh<sub>4</sub> = 49 mM

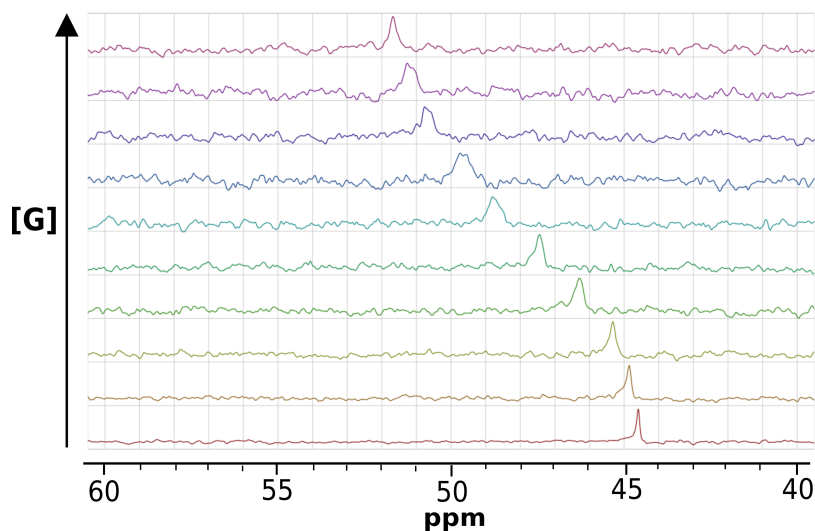

Graph S188. <sup>31</sup>P-NMR spectra of titration of 2-EthylhexylammoniumBPh<sub>4</sub> with phosphine oxide in acetone.

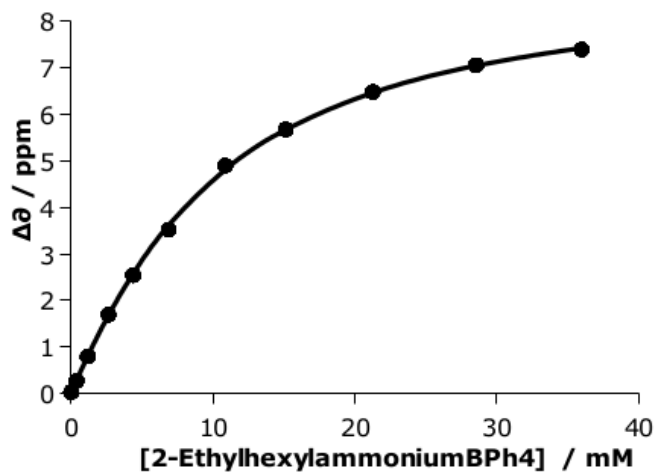

Graph S189. Binding isotherms for titration using 1:1 fitting program for titration of 2-EthylhexylammoniumBPh<sub>4</sub> against phosphine oxide in acetone. [phosphine oxide] = 5.2 mM and [ 2-EthylhexylammoniumBPh<sub>4</sub> ] = 4.9 mM, Δppm = 7.09.

$$K_a = 123 \pm 34 \text{ M}^{-1} \quad 80 \% \text{ bound}$$

k) Titration of phosphine oxide with  $\text{IPh}_2\text{BPF}_6$  in acetone



Host: phosphine oxide = 5.1 mM

Guest:  $\text{IPh}_2\text{PF}_6$  = 49 mM

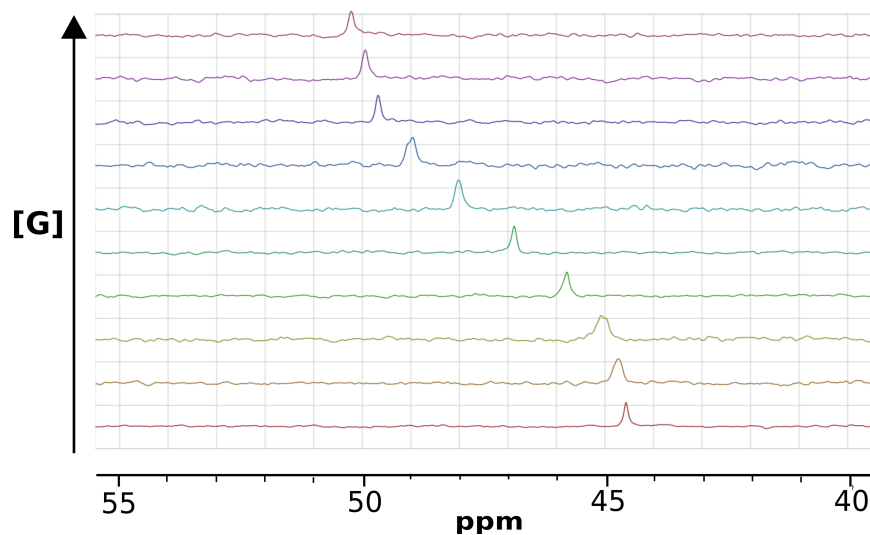

Graph S190.  $^{31}\text{P}$ -NMR spectra of titration of  $\text{IPh}_2\text{PF}_6$  with phosphine oxide in acetone.

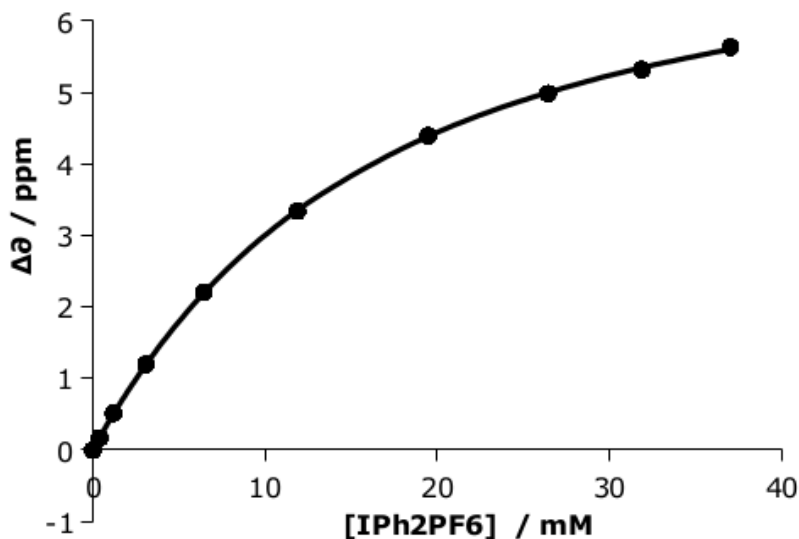

Graph S191. Binding isotherms for titration using 1:1 fitting program for titration of  $\text{IPh}_2\text{BF}_4$  against phosphine oxide in acetone. [phosphine oxide] = 5.1 mM and  $[\text{IPh}_2\text{PF}_6] = 49$  mM,  $\Delta\text{ppm} = 5.64$ .

$$K_a = 83 \pm 12 \text{ M}^{-1} \quad 72 \% \text{ bound}$$

1) Titration of phosphine oxide with TriphenylmethylPF<sub>6</sub> in acetone

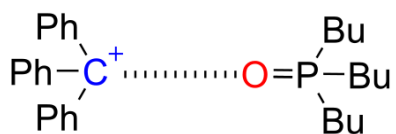

Host: phosphine oxide = 5.5 mM

Guest: TriphenylmethylPF<sub>6</sub> = 50 mM

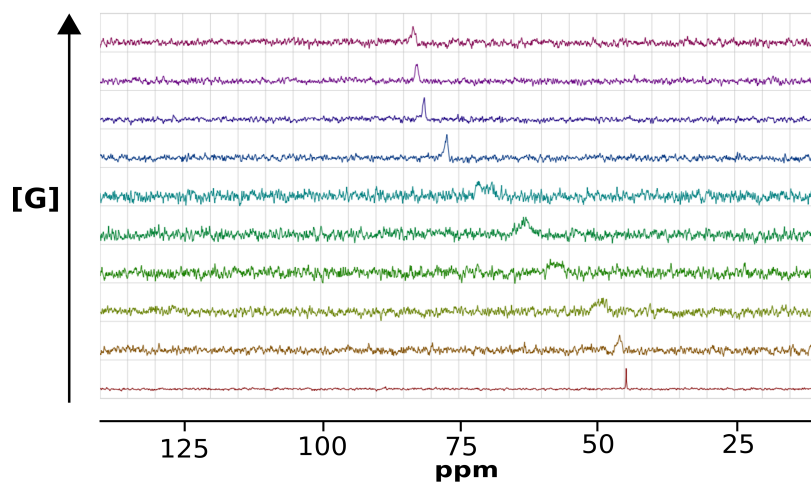

Graph S192. <sup>31</sup>P-NMR spectra of titration of TriphenylmethylPF<sub>6</sub> with phosphine oxide in acetone.

m) Titration of phosphine oxide with NaBF<sub>4</sub> in acetone



Host: phosphine oxide = 5.5 mM

Guest: NaBF<sub>4</sub> = 58 mM

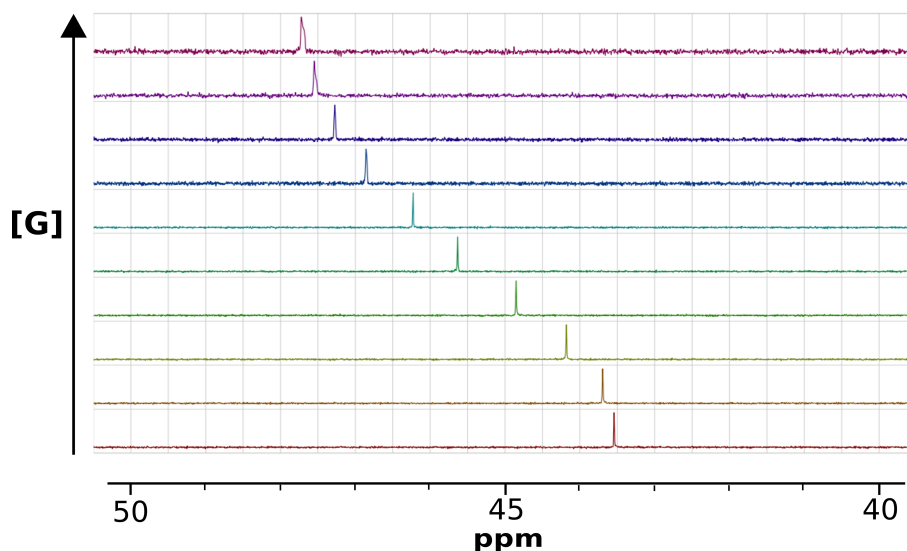

Graph S193. <sup>31</sup>P-NMR spectra of titration of NaBF<sub>4</sub> with phosphine oxide in acetone.

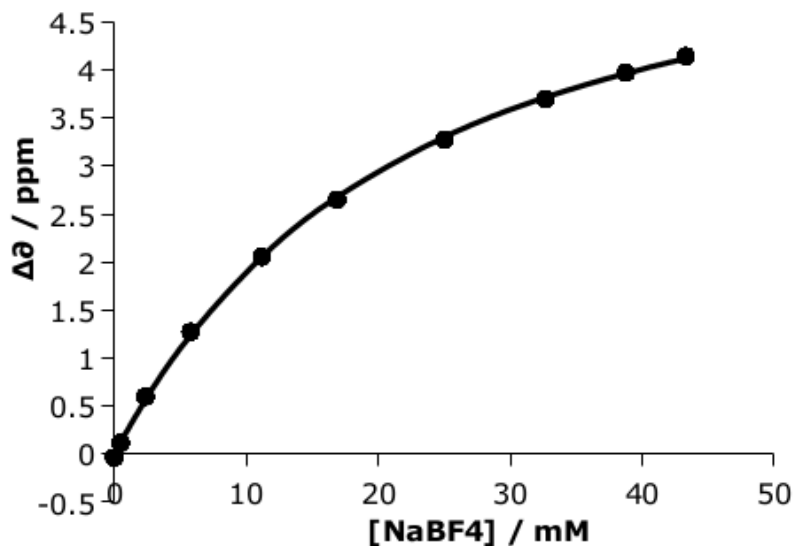

Graph S194. Binding isotherms for titration using 1:1 fitting program for titration of NaBF<sub>4</sub> against phosphine oxide in acetone. [phosphine oxide] = 5.5 mM and [NaBF<sub>4</sub>] = 58 mM, Δppm = 4.15.

$$K_a = 57 \pm 2 \text{ M}^{-1} \quad 69 \% \text{ bound}$$

n) Titration of phosphine oxide with NaBArF in acetone

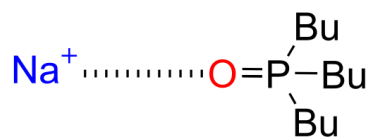

Host: phosphine oxide = 4.5 mM

Guest: NaBArF = 50 mM

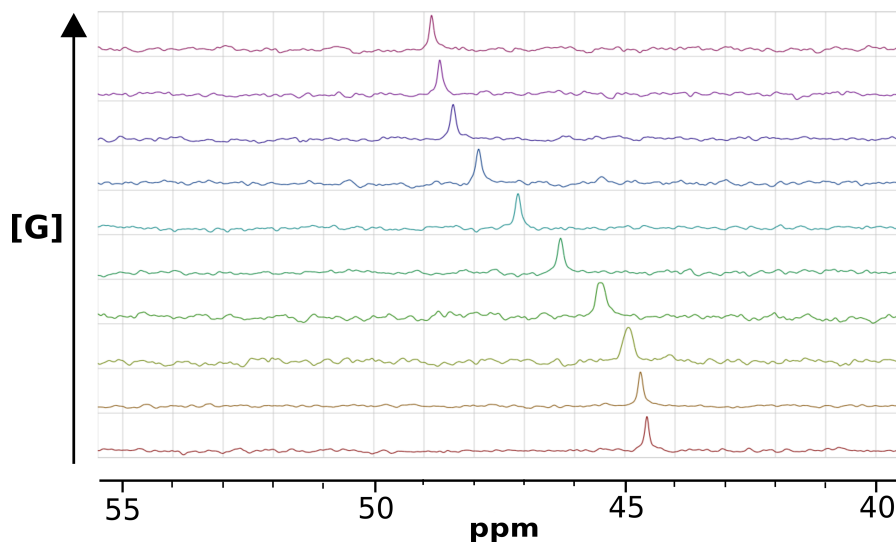

Graph S195.  $^{31}\text{P}$ -NMR spectra of titration of NaBArF with phosphine oxide in acetone.

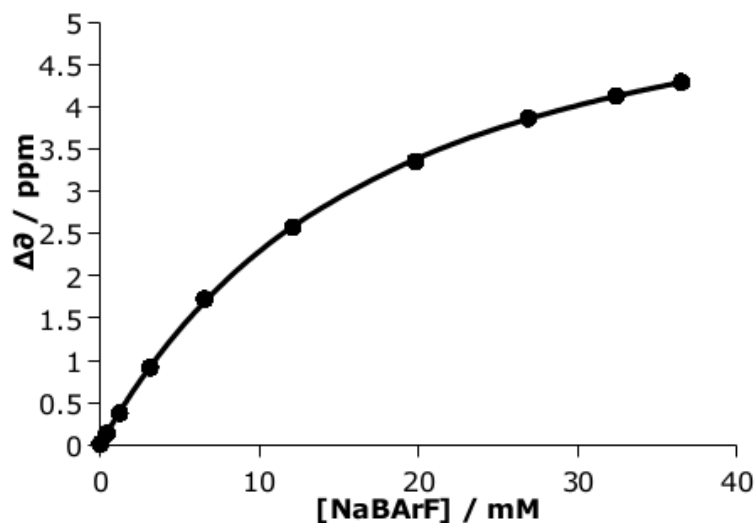

Graph S196. Binding isotherms for titration using 1:1 fitting program for titration of NaBArF against phosphine oxide in acetone. [phosphine oxide] = 4.5 mM and [NaBArF] = 50 mM,  $\Delta\text{ppm} = 4.12$ .

$$K_a = 72 \pm 2 \text{ M}^{-1} \quad 71 \% \text{ bound}$$

o) Titration of phosphine oxide with  $\text{NaN}(\text{SO}_2\text{CF}_3)_2$  in acetone



Host: phosphine oxide = 5.0 mM

Guest:  $\text{NaN}(\text{SO}_2\text{CF}_3)_2$  = 51 mM

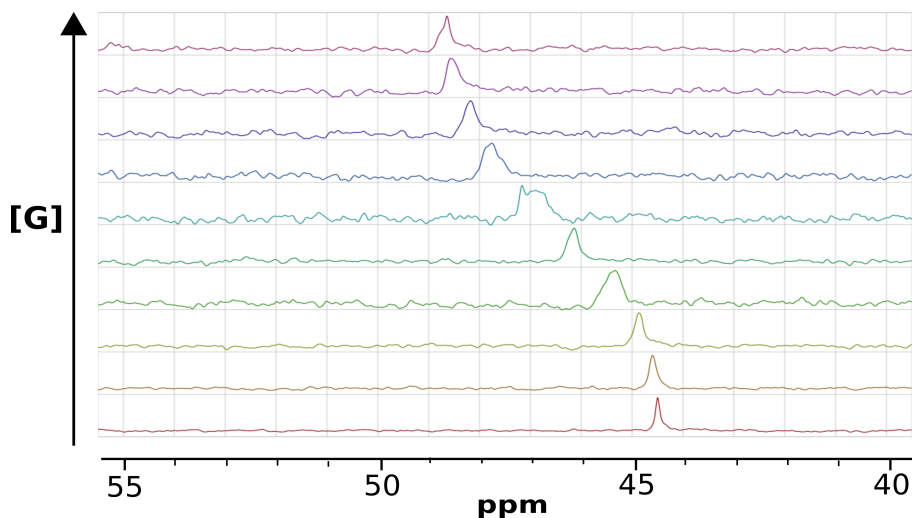

Graph S197.  $^{31}\text{P}$ -NMR spectra of titration of  $\text{NaN}(\text{SO}_2\text{CF}_3)_2$  with phosphine oxide in acetone.

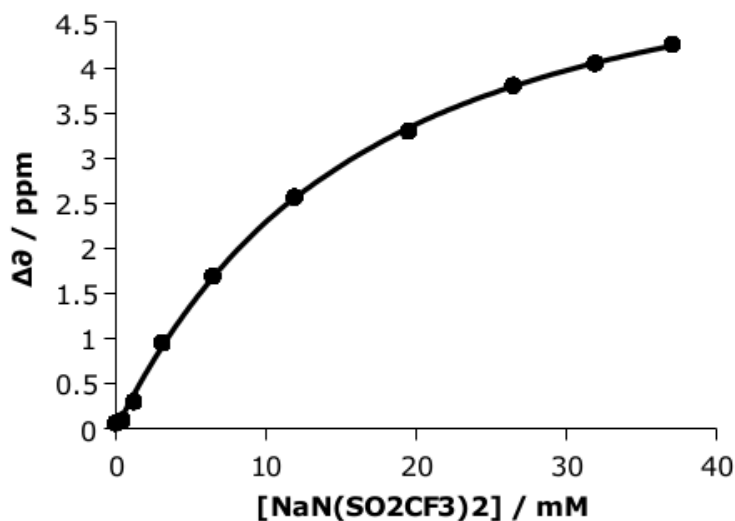

Graph S198. Binding isotherms for titration using 1:1 fitting program for titration of  $\text{NaN}(\text{SO}_2\text{CF}_3)_2$  against phosphine oxide in acetone. [phosphine oxide] = 5.0 mM and [  $\text{NaN}(\text{SO}_2\text{CF}_3)_2$  ] = 51 mM,  $\Delta\text{ppm} = 4.14$ .

$$K_a = 78 \pm 12 \text{ M}^{-1} \quad 71 \% \text{ bound}$$

p) Titration of phosphine oxide with NaI in acetone



Host: phosphine oxide = 4.9 mM

Guest: NaI = 61 mM

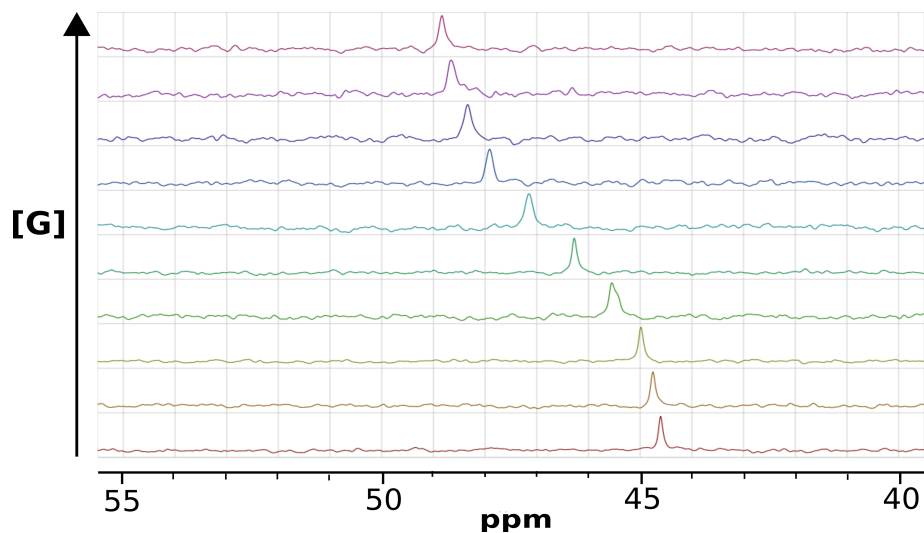

Graph S199.  $^{31}\text{P}$ -NMR spectra of titration of NaI with phosphine oxide in acetone.

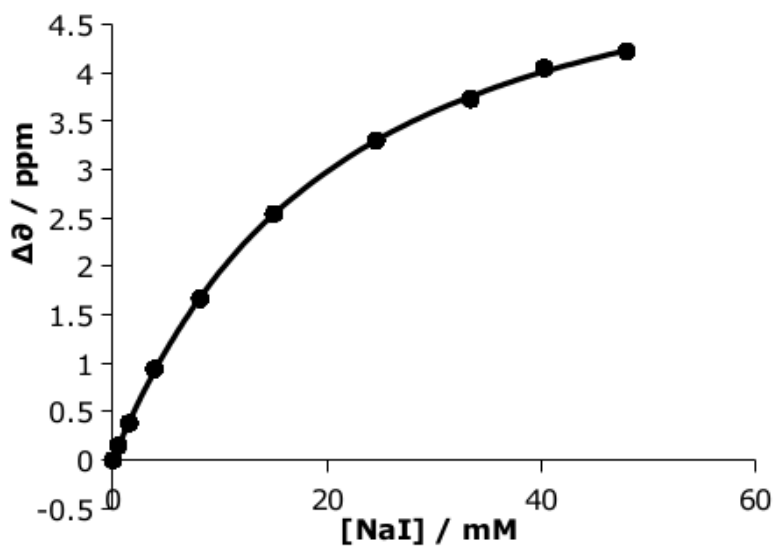

Graph S200. Binding isotherms for titration using 1:1 fitting program for titration of NaI against phosphine oxide in acetone. [phosphine oxide] = 4.9 mM and [NaI] = 61 mM,  $\Delta\text{ppm} = 4.23$ .

$$K_a = 59 \pm 6 \text{ M}^{-1} \quad 70 \% \text{ bound}$$

q) Titration of phosphine oxide with NaPF<sub>6</sub> in acetone



Host: phosphine oxide = 5.5 mM

Guest: NaPF<sub>6</sub> = 57 mM

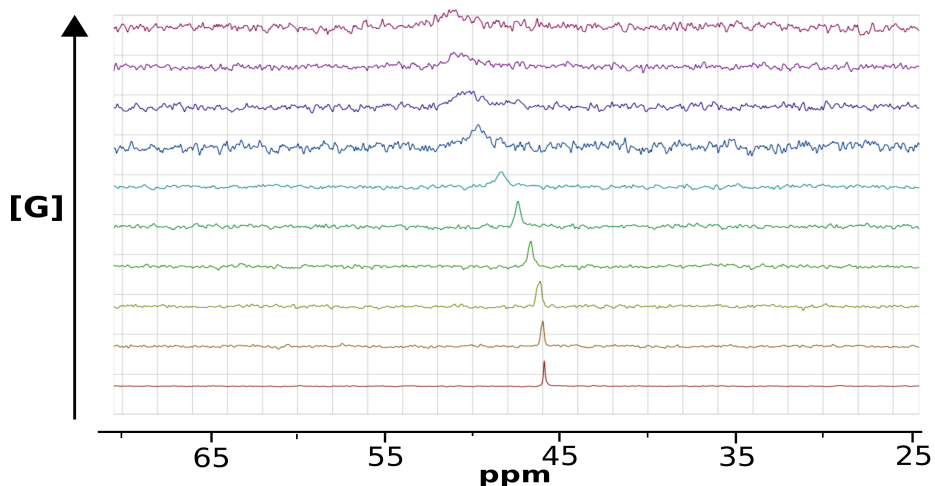

Graph S201. <sup>31</sup>P-NMR spectra of titration of NaPF<sub>6</sub> with phosphine oxide in acetone.

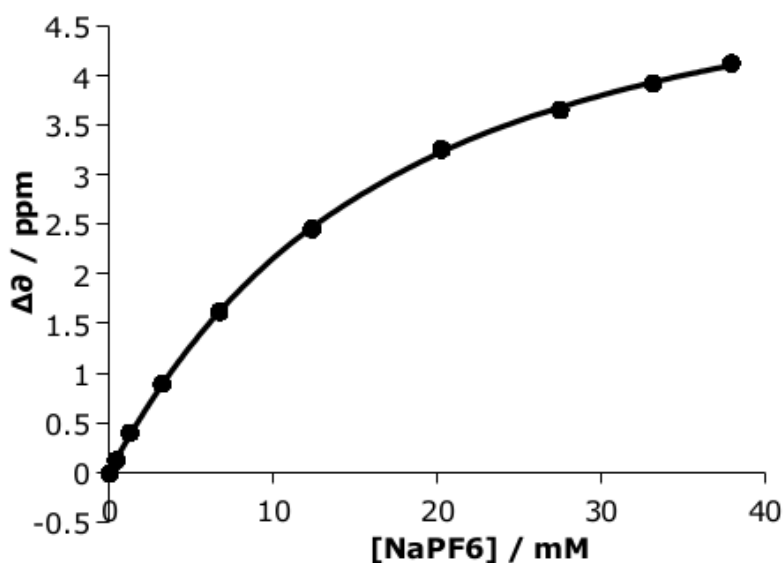

Graph S202. Binding isotherms for titration using 1:1 fitting program for titration of NaPF<sub>6</sub> against phosphine oxide in acetone. [phosphine oxide] = 5.5 mM and [NaPF<sub>6</sub>] = 57 mM, Δppm = 4.09.

$$K_a = 55 \pm 13 \text{ M}^{-1} \quad 68 \% \text{ bound}$$



r) Titration of phosphine oxide with KBPh<sub>4</sub> in acetone

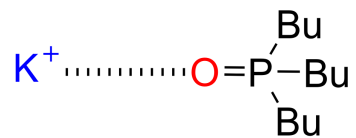

Host: phosphine oxide = 5.2 mM

Guest: KBPh<sub>4</sub> = 110 mM

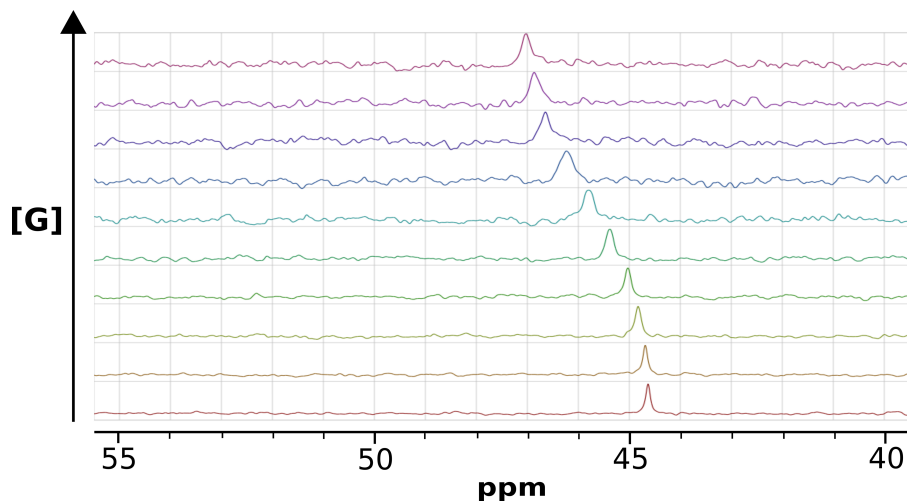

Graph S203. <sup>31</sup>P-NMR spectra of titration of KBPh<sub>4</sub> with phosphine oxide in acetone.

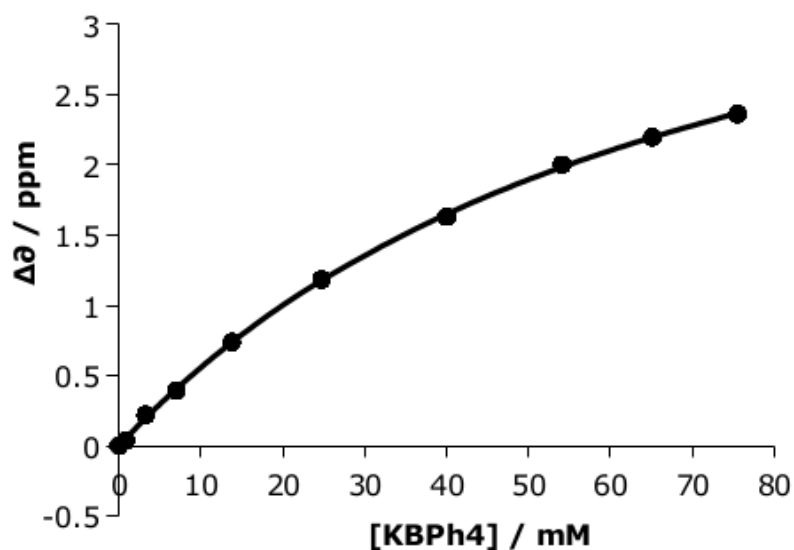

Graph S204. Binding isotherms for titration using 1:1 fitting program for titration of KBPh<sub>4</sub> against phosphine oxide in acetone. [phosphine oxide] = 5.2 mM and [KBPh<sub>4</sub>] = 110 mM, Δppm = 2.31 .

$$K_a = 13 \pm 3 \text{ M}^{-1} \quad 51 \% \text{ bound}$$

## Titration Curves for Phosphine Oxide in chloroform.

### a) Titration of phosphine oxide with phenol in chloroform

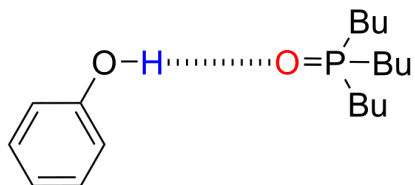

Host: phosphine oxide = 1.9 mM

Guest: phenol = 54 mM

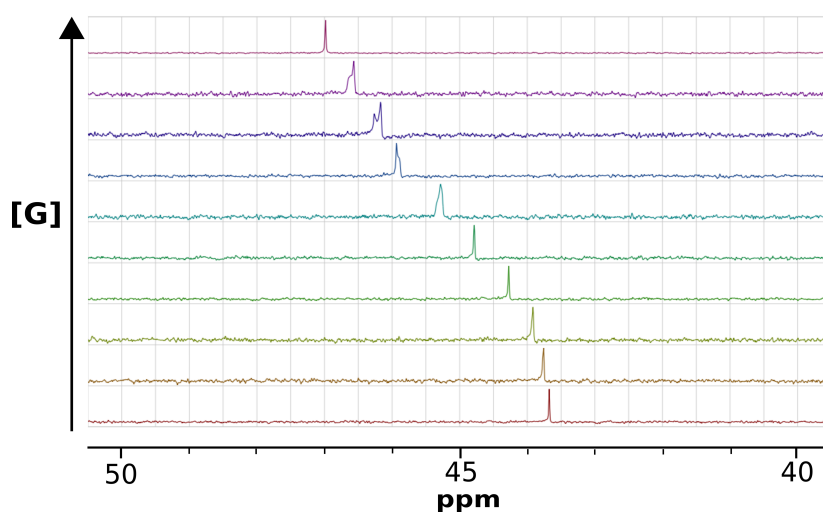

Graph S205.  $^{31}\text{P}$ -NMR spectra of titration of phenol with phosphine oxide in chloroform.

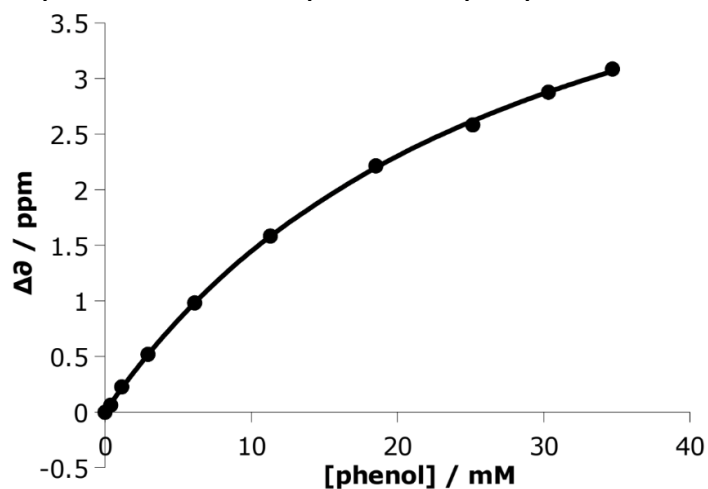

Graph S206. Binding isotherms for titration using 1:1 fitting program for titration of phenol against phosphine oxide in chloroform. [phosphine oxide] = 1.9 mM and [Phenol] = 54 mM,  $\Delta\text{ppm} = 3.31$ .

$$K_a = 38 \pm 2 \text{ M}^{-1} \quad 60 \% \text{ bound}$$

b) Titration of phosphine oxide with 4-phenylazophenol in chloroform

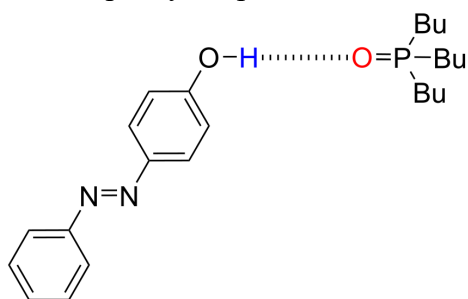

Host: phosphine oxide = 0.52 mM

Guest: 4-phenylazophenol = 11 mM

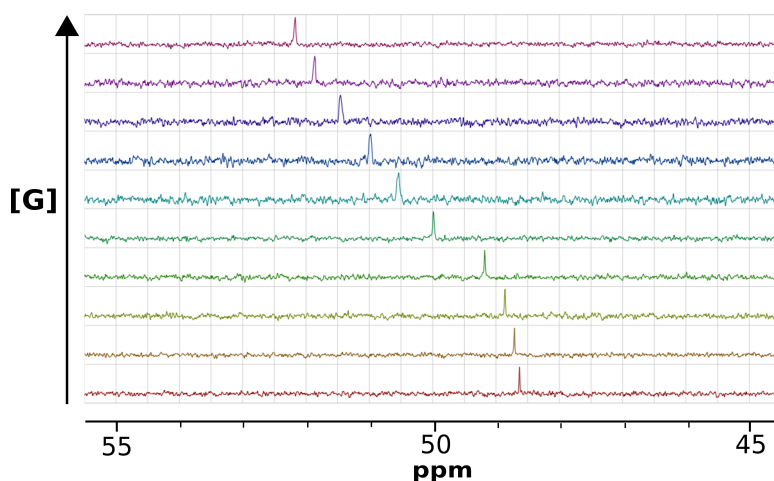

Graph S207.  $^{31}\text{P}$ -NMR spectra of titration of 4-phenylazophenol with phosphine oxide in chloroform.

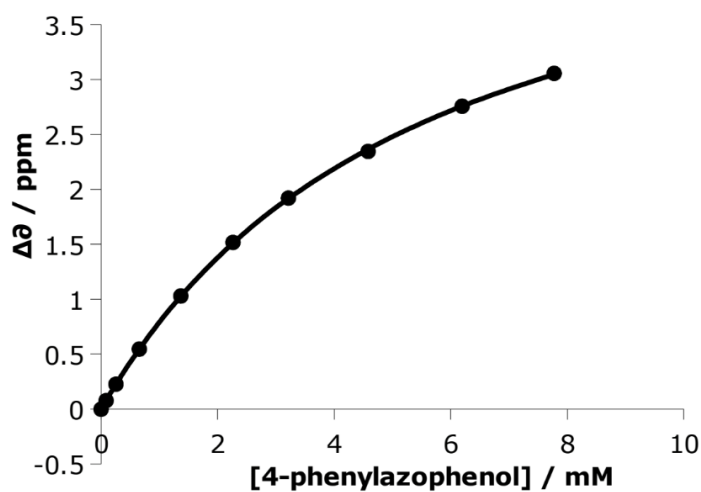

Graph S208. Binding isotherms for titration using 1:1 fitting program for titration of 4-phenylazophenol against phosphine oxide in chloroform. [phosphine oxide] = 0.52 mM and [4-phenylazophenol] = 11 mM,  $\Delta\text{ppm} = 3.06$ .

$$K_a = 193 \pm 27 \text{ M}^{-1} \quad 60 \% \text{ bound}$$

c) Titration of phosphine oxide with 4-nitrophenol in chloroform

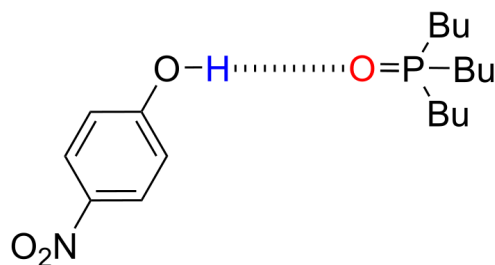

Host: phosphine oxide = 0.46 mM

Guest: 4-nitrophenol = 4.8 mM

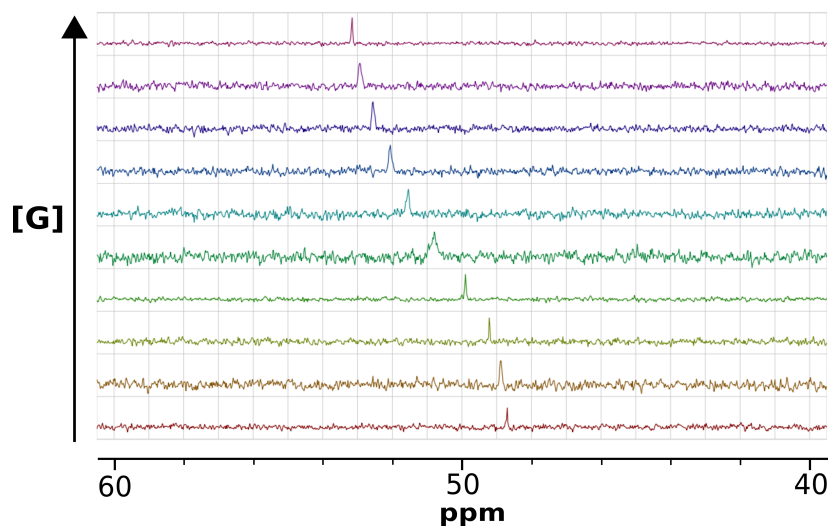

Graph S209.  $^{31}\text{P}$ -NMR spectra of titration of 4-nitrophenol with phosphine oxide in chloroform.

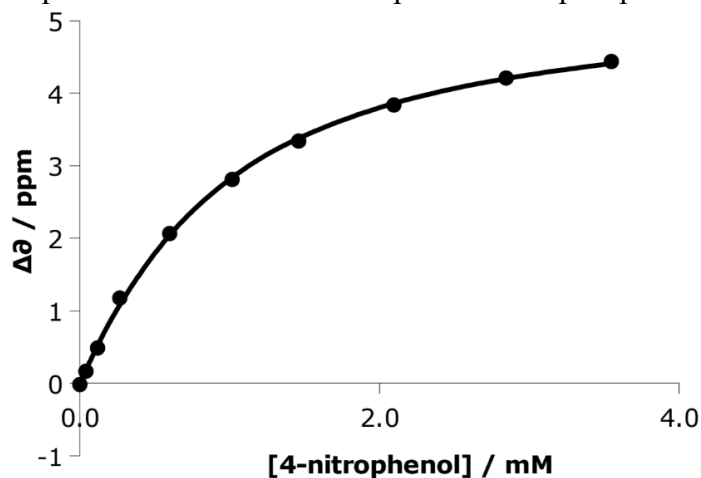

Graph S210. Binding isotherms for titration using 1:1 fitting program for titration of 4-nitrophenol against phosphine oxide in chloroform. [phosphine oxide] = 0.46 mM and [4-nitrophenol] = 4.8 mM,  $\Delta\text{ppm} = 4.25$ .

$$K_a = 1416 \pm 208 \text{ M}^{-1}$$

82 % bound

d) Titration of phosphine oxide with 4-nitro,3-trifluoromethylphenol in chloroform

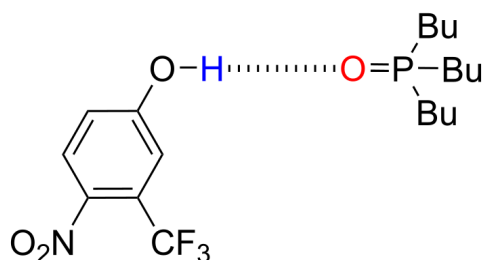

Host: phosphine oxide = 0.58 mM

Guest: 4-nitro,3-trifluoromethylphenol = 14 mM

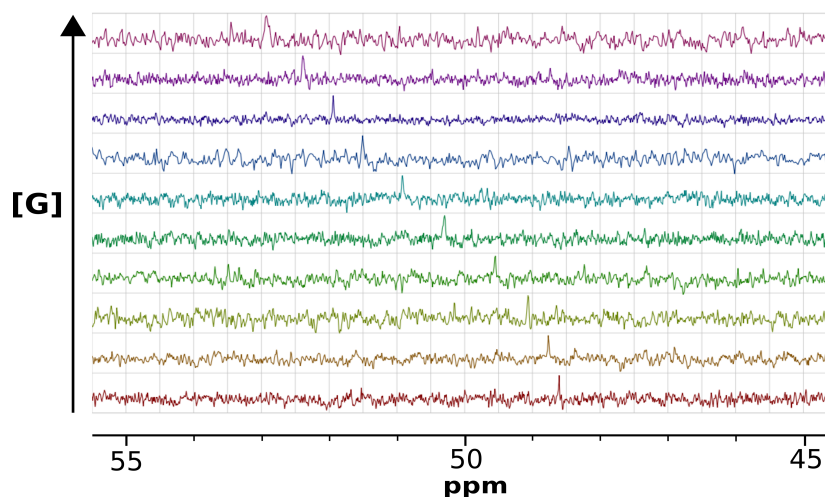

Graph S211.  $^{31}\text{P}$ -NMR spectra of titration of 4-nitro,3-trifluoromethylphenol with phosphine oxide in chloroform.

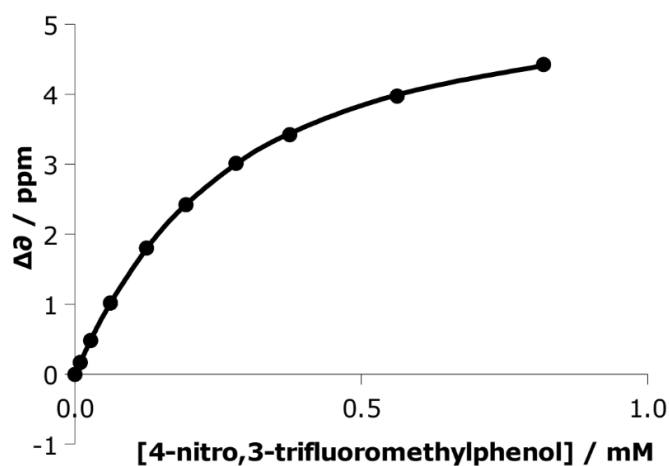

Graph S212. Binding isotherms for titration using 1:1 fitting program for titration of 4-nitro,3-trifluoromethylphenol against phosphine oxide in chloroform.  $[\text{phosphine oxide}] = 0.58 \text{ mM}$  and  $[4\text{-nitro,3-trifluoromethylphenol}] = 14 \text{ mM}$ ,  $\Delta\text{ppm} = 4.31$ .

$$K_a = 5370 \pm 294 \text{ M}^{-1} \quad 66 \% \text{ bound}$$

## Titration Curves for Phosphine Oxide in Carbon Tetrachloride.

### a) Titration of phosphine oxide with phenol in carbon tetrachloride



Host: phenol = 0.49 mM

Guest: phosphine oxide = 4.3 mM

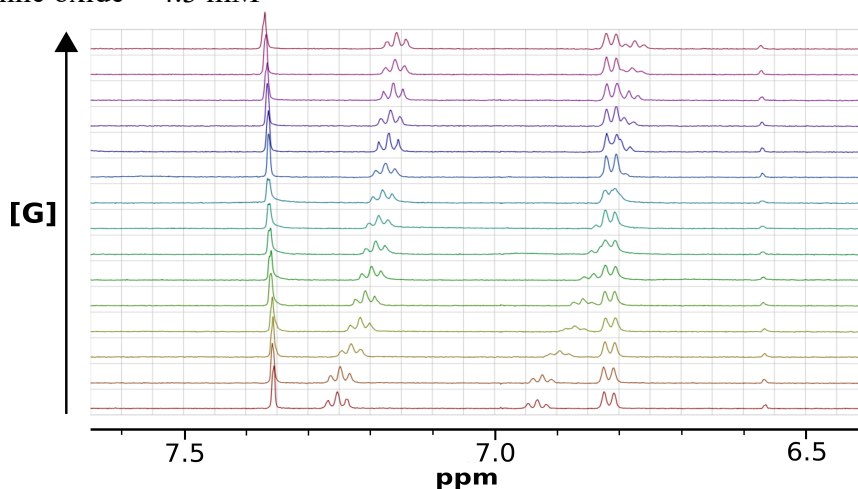

Graph S213.  $^1\text{H}$ -NMR spectra of titration of phenol with phosphine oxide in carbon tetrachloride.

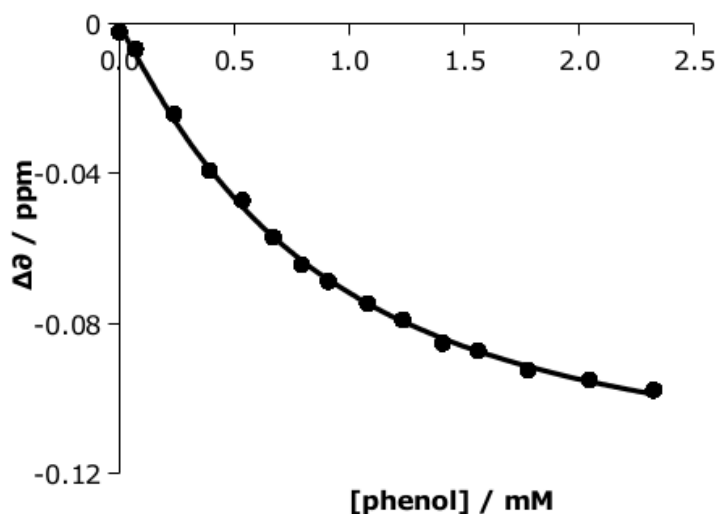

Graph S214. Binding isotherms for titration using 1:1 fitting program for titration of phenol against phosphine oxide in carbon tetrachloride. [phosphine oxide] = 4.3 mM and [Phenol] = 0.49 mM,  $\Delta\text{ppm} = 0.095$ .

$$K_a = 1860 \pm 226 \text{ M}^{-1}$$

**78% bound**

b) Titration of phosphine oxide with 5-nitroindole in carbon tetrachloride

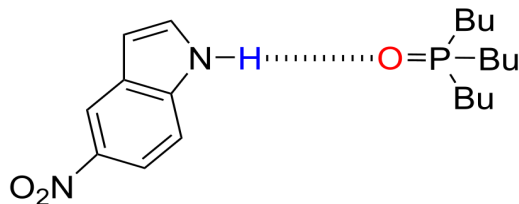

Host: 5-nitroindole = 1.5 mM

Guest: phosphine oxide = 11 Mm

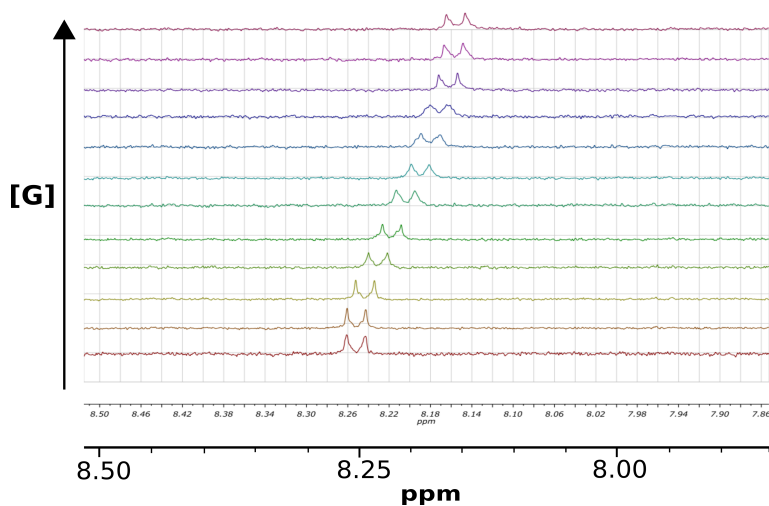

Graph S215.  $^{31}\text{P}$ -NMR spectra of titration of 5-nitroindole with phosphine oxide in carbon tetrachloride.

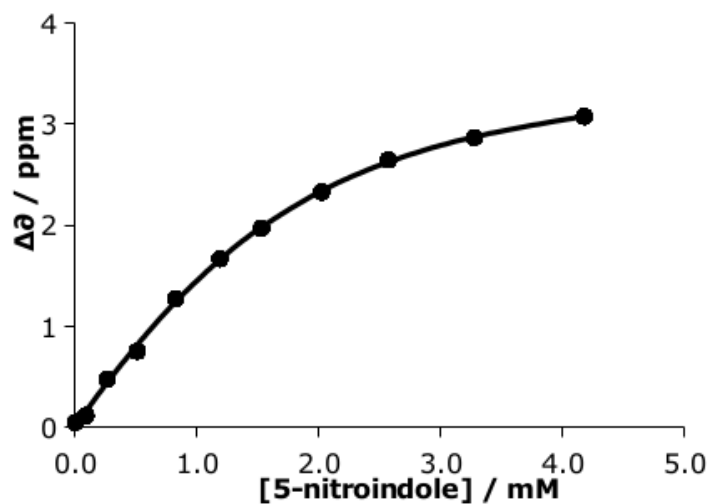

Graph S216. Binding isotherms for titration using 1:1 fitting program for titration of 5-nitroindole against phosphine oxide in carbon tetrachloride . [phosphine oxide] = 11 mM and [ 5-nitroindole] = 1.5 mM,  $\Delta\text{ppm} = 4.53$ .

$$K_a = 1350 \pm 480 \text{ M}^{-1}$$

**82% bound**

c) Titration of phosphine oxide with 4-phenylazophenol in carbon tetrachloride

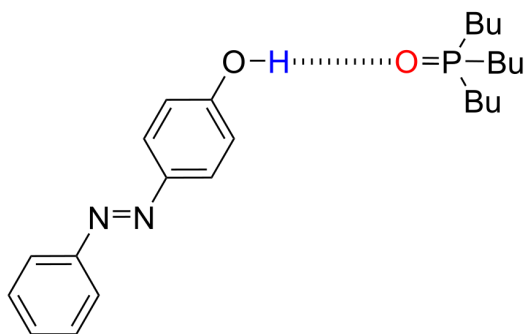

Host: 4-phenylazophenol = 0.19 mM

Guest: phosphine oxide = 0.84 mM

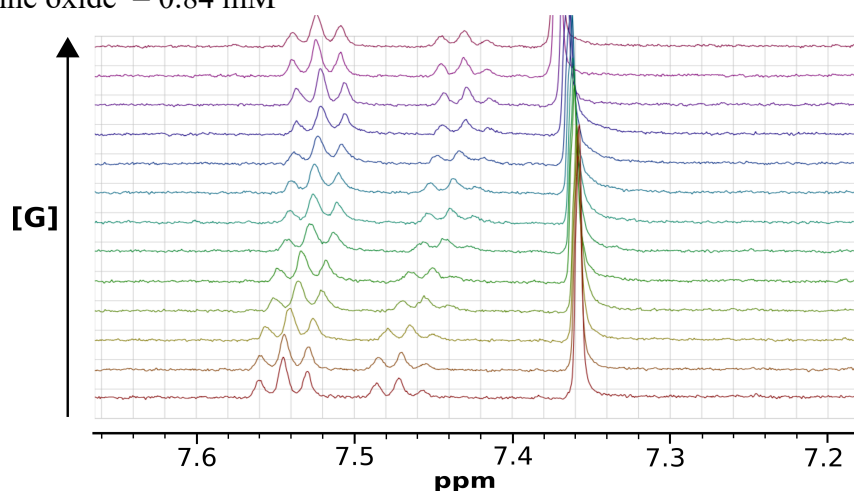

Graph S217.  $^1\text{H}$ -NMR spectra of titration of 4-phenylazophenol with phosphine oxide in carbon tetrachloride.

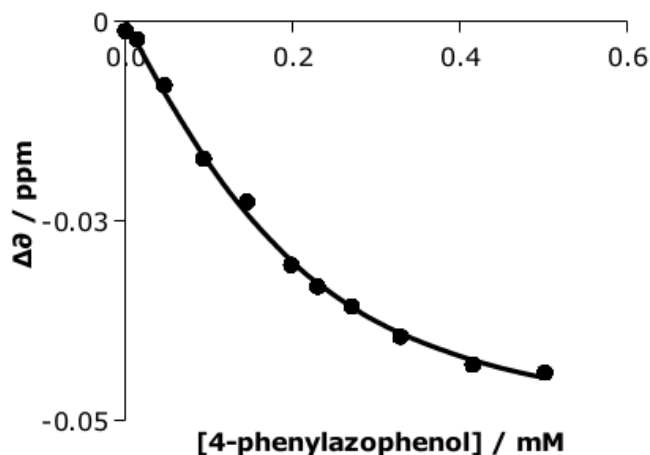

Graph S218. Binding isotherms for titration using 1:1 fitting program for titration of Phenol against phosphine oxide in carbon tetrachloride. [phosphine oxide] = 0.84 mM and [4-phenylazophenol] 0.19 = mM,  $\Delta\text{ppm} = -0.043$ .

$$K_a = 14350 \pm 2404 \text{ M}^{-1} \quad 82 \% \text{ bound}$$



d) Titration of phosphine oxide with 4-nitrophenol in carbon tetrachloride

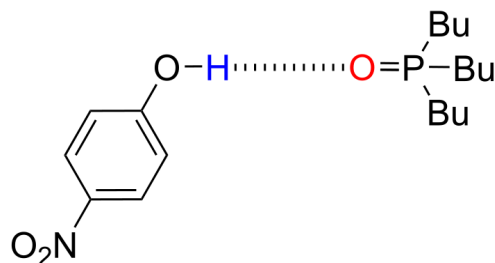

Host: 4-nitrophenol = 0.10 mM

Guest: phosphine oxide = 0.47 mM

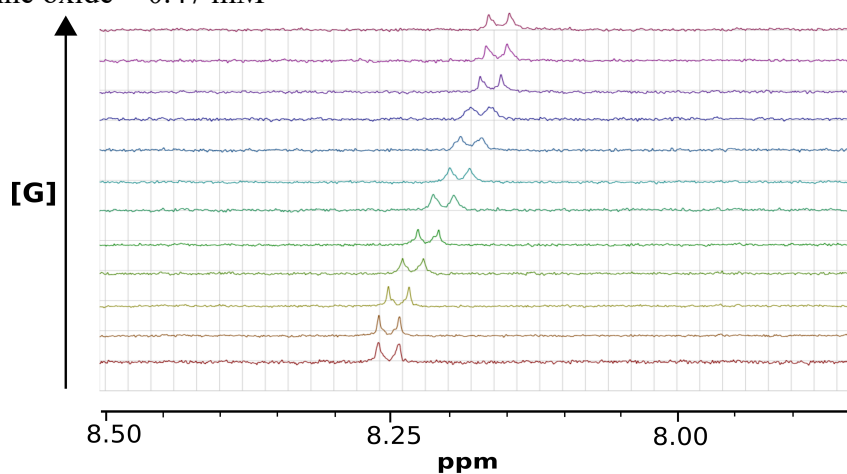

Graph S219.  $^1\text{H}$ -NMR spectra of titration of 4-nitrophenol with phosphine oxide in carbon tetrachloride.

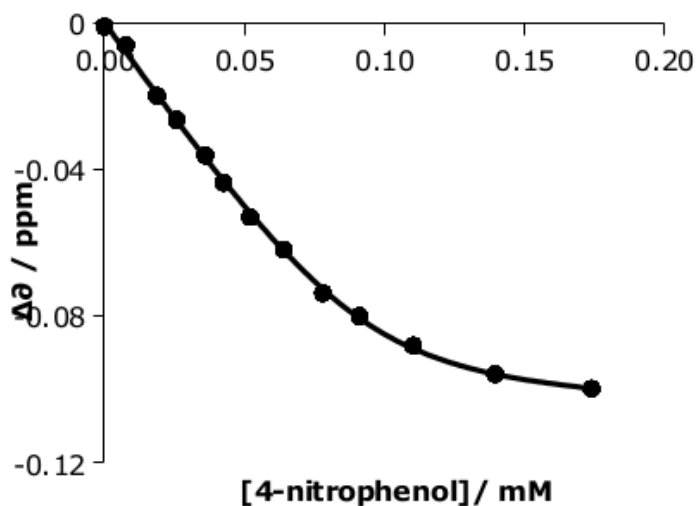

Graph S220. Binding isotherms for titration using 1:1 fitting program for titration of Phenol against phosphine oxide in carbon tetrachloride. [phosphine oxide] = 0.47 mM and [4-nitrophenol] = 0.10 mM,  $\Delta\text{ppm} = -2.8082$ .

**$K_a = 142000 \pm 26870 \text{ M}^{-1}$       93% bound**  
**21. Summary of UV/vis Spectroscopy Titration Experiments.**

| Hydrogen Bond Donor                                | Acceptor           | Solvent                               | $K (\text{M}^{-1})^a$ | % bound | $\epsilon_{\text{bound}} (\text{M}^{-1} \text{ cm}^{-1})$ |
|----------------------------------------------------|--------------------|---------------------------------------|-----------------------|---------|-----------------------------------------------------------|
| 4-phenylazophenol                                  | Reichardt's dye    | Acetonitrile                          | $3100 \pm 650$        | 63      | 1269                                                      |
| 4-phenylazophenol                                  | Bu <sub>3</sub> PO | Acetonitrile                          | $69 \pm 9$            | 77      | 3828                                                      |
| 4-phenylazophenol                                  | Reichardt's dye    | Chloroform                            | $4000 \pm 700$        | 65      | 3642                                                      |
| 4-phenylazophenol                                  | Bu <sub>3</sub> PO | Chloroform                            | $240 \pm 45$          | 80      | 3714                                                      |
| 4-phenylazophenol                                  | Reichardt's dye    | Acetone                               | $2000 \pm 500$        | 58      | 2252                                                      |
| 4-phenylazophenol                                  | Phosphine oxide    | Acetone                               | $48 \pm 16$           | 57      | 2492                                                      |
| 4-phenylazophenol                                  | Phosphine oxide    | Carbon tetrachloride                  | $9200 \pm 1900$       | 90      | 7310                                                      |
| phenol                                             | Reichardt's dye    | Acetonitrile                          | $260 \pm 63$          | 61      | 2225                                                      |
| phenol                                             | Reichardt's dye    | Chloroform                            | $260 \pm 55$          | 59      | 2590                                                      |
| phenol                                             | Bu <sub>3</sub> PO | Chloroform                            | $55 \pm 7$            | 64      | 2642                                                      |
| phenol                                             | Reichardt's dye    | Acetone                               | $340 \pm 6$           | 64      | 1920                                                      |
| 5-nitroindole                                      | Reichardt's dye    | Acetonitrile                          | $200 \pm 50$          | 58      | 264                                                       |
| 5-nitroindole                                      | Reichardt's dye    | Chloroform                            | $1200 \pm 500$        | 61      | 2486                                                      |
| 5-nitroindole                                      | Bu <sub>3</sub> PO | Chloroform                            | $18 \pm 6$            | 68      | 1189                                                      |
| 5-nitroindole                                      | Reichardt's dye    | Acetone                               | $860 \pm 350$         | 79      | 353                                                       |
| 5-nitroindole                                      | Bu <sub>3</sub> PO | Carbon tetrachloride                  | $1200 \pm 400$        | 68      | 4125                                                      |
| 4-nitro,3-trifluoromethylphenol                    | Bu <sub>3</sub> PO | Acetonitrile                          | $300 \pm 98$          | 89      | 1591                                                      |
| 4-nitro,3-trifluoromethylphenol                    | Bu <sub>3</sub> PO | Chloroform                            | $5400 \pm 1700$       | 75      | 3133                                                      |
| 4-nitrophenol                                      | Bu <sub>3</sub> PO | Acetonitrile                          | $110 \pm 36$          | 62      | 3024                                                      |
| 4-nitrophenol                                      | Bu <sub>3</sub> PO | Chloroform                            | $1400 \pm 110$        | 75      | 6403                                                      |
| 4-nitrophenol                                      | Bu <sub>3</sub> PO | Carbon tetrachloride                  | $98600 \pm 19000$     | 83      | 5267.                                                     |
| NaBPh <sub>4</sub>                                 | Reichardt's dye    | Acetonitrile                          | $390 \pm 51$          | 63      | 1505                                                      |
| NaBPh <sub>4</sub>                                 | Reichardt's dye    | Acetone                               | $1700 \pm 160$        | 74      | 1327                                                      |
| NaPF <sub>6</sub>                                  | Reichardt's dye    | Acetone                               | $1700 \pm 140$        | 53      | 1773                                                      |
| NaBF <sub>4</sub>                                  | Reichardt's dye    | Acetonitrile                          | $300 \pm 90$          | 70      | 2223                                                      |
| NaBF <sub>4</sub>                                  | Reichardt's dye    | Acetone                               | $1900 \pm 100$        | 77      | 613                                                       |
| NaN(SO <sub>2</sub> CF <sub>3</sub> ) <sub>2</sub> | Reichardt's dye    | Acetonitrile                          | $410 \pm 30$          | 71      | 551                                                       |
| NaN(SO <sub>2</sub> CF <sub>3</sub> ) <sub>2</sub> | Reichardt's dye    | Acetone                               | $1500 \pm 200$        | 68      | 1207                                                      |
| NaBAR <sup>F</sup>                                 | Reichardt's dye    | Acetonitrile                          | $400 \pm 160$         | 78      | 625                                                       |
| NaBAR <sup>F</sup>                                 | Reichardt's dye    | Acetone                               | $1400 \pm 400$        | 71      | 1433                                                      |
| NaI                                                | Reichardt's dye    | Acetonitrile                          | $320 \pm 120$         | 60      | 470                                                       |
| NaI                                                | Reichardt's dye    | Acetone                               | $1000 \pm 300$        | 70      | 1323                                                      |
| KBPh <sub>4</sub>                                  | Reichardt's dye    | Acetone                               | $270 \pm 75$          | 51      | 1053                                                      |
| CsBPh <sub>4</sub>                                 | Reichardt's dye    | Acetone                               | $210 \pm 35$          | 60      | 289                                                       |
| RbBPh <sub>4</sub>                                 | Reichardt's dye    | Acetone                               | $220 \pm 50$          | 56      | 840                                                       |
| TBABF <sub>4</sub>                                 | Reichardt's dye    | Acetone                               | $10 \pm 2$            | 55      | 1093                                                      |
| LiBPh <sub>4</sub> tris(1,2-dimethoxyethane)       | Reichardt's dye    | Acetonitrile                          | $27400 \pm 5900$      | 70      | 1800                                                      |
| GuanidiniumBPh <sub>4</sub>                        | Reichardt's dye    | Acetonitrile                          | $33800 \pm 2000$      | 79      | 2287                                                      |
| IPh <sub>2</sub> BF <sub>4</sub>                   | Reichardt's dye    | Acetonitrile                          | $38300 \pm 1100$      | 87      | 1746                                                      |
| IPh <sub>2</sub> BF <sub>4</sub>                   | Reichardt's dye    | Acetone                               | $48000 \pm 3000$      | 79      | 6867                                                      |
| 4-methyl-1-butylpyridiniumPF <sub>6</sub>          | Reichardt's dye    | Acetonitrile                          | $12 \pm 2$            | 59      | 506                                                       |
| 4-methyl-1-butylpyridiniumPF <sub>6</sub>          | Reichardt's dye    | Acetone                               | $180 \pm 40$          | 84      | 1207                                                      |
| 1-methyl,3-octylimidazolium                        | Reichardt's dye    | Acetonitrile                          | $23 \pm 9$            | 51      | 731                                                       |
| 1-methyl,3-octylimidazolium                        | Reichardt's dye    | Acetone                               | $200 \pm 60$          | 67      | 653                                                       |
| 4-phenylazophenol                                  | Reichardt's dye    | Acetonitrile + 0.1% H <sub>2</sub> O  | $2700 \pm 560$        | 60      | 1533                                                      |
| 4-phenylazophenol                                  | Reichardt's dye    | Acetonitrile + 0.25% H <sub>2</sub> O | $1600 \pm 380$        | 50      | 792                                                       |
| 4-phenylazophenol                                  | Reichardt's dye    | Acetonitrile + 0.5% H <sub>2</sub> O  | $1100 \pm 180$        | 51      | 2183                                                      |
| 4-phenylazophenol                                  | Reichardt's dye    | Acetonitrile + 1% H <sub>2</sub> O    | $800 \pm 20$          | 65      | 1438                                                      |

|                                                    |                 |                                       |              |    |      |
|----------------------------------------------------|-----------------|---------------------------------------|--------------|----|------|
| NaN(SO <sub>2</sub> CF <sub>3</sub> ) <sub>2</sub> | Reichardt's dye | Acetonitrile + 0.1% H <sub>2</sub> O  | 380 ± 38     | 75 | 1195 |
| NaN(SO <sub>2</sub> CF <sub>3</sub> ) <sub>2</sub> | Reichardt's dye | Acetonitrile + 0.25% H <sub>2</sub> O | 290 ± 18     | 75 | 683  |
| NaN(SO <sub>2</sub> CF <sub>3</sub> ) <sub>2</sub> | Reichardt's dye | Acetonitrile + 0.5% H <sub>2</sub> O  | 250 ± 60     | 71 | 783  |
| GuanidiniumBPh <sub>4</sub>                        | Reichardt's dye | Acetonitrile + 0.1% H <sub>2</sub> O  | 34000 ± 3800 | 91 | 1952 |
| GuanidiniumBPh <sub>4</sub>                        | Reichardt's dye | Acetonitrile + 0.25% H <sub>2</sub> O | 27000 ± 2000 | 90 | 1990 |
| GuanidiniumBPh <sub>4</sub>                        | Reichardt's dye | Acetonitrile + 0.5% H <sub>2</sub> O  | 12600 ± 4200 | 88 | 1488 |
| GuanidiniumBPh <sub>4</sub>                        | Reichardt's dye | Acetonitrile + 1% H <sub>2</sub> O    | 11000 ± 2000 | 89 | 469  |
| 4-phenylazophenol                                  | Reichardt's dye | Acetone + 0.1% H <sub>2</sub> O       | 1800 ± 280   | 67 | 1963 |
| 4-phenylazophenol                                  | Reichardt's dye | Acetone + 0.25% H <sub>2</sub> O      | 1300 ± 71    | 50 | 2887 |
| 4-phenylazophenol                                  | Reichardt's dye | Acetone + 0.5% H <sub>2</sub> O       | 860 ± 240    | 50 | 613  |
| 4-phenylazophenol                                  | Reichardt's dye | Acetone + 1% H <sub>2</sub> O         | 600 ± 200    | 51 | 247  |
| NaN(SO <sub>2</sub> CF <sub>3</sub> ) <sub>2</sub> | Reichardt's dye | Acetone + 0.1% H <sub>2</sub> O       | 1500 ± 500   | 71 | 1238 |
| NaN(SO <sub>2</sub> CF <sub>3</sub> ) <sub>2</sub> | Reichardt's dye | Acetone + 0.25% H <sub>2</sub> O      | 1100 ± 200   | 63 | 2227 |
| NaN(SO <sub>2</sub> CF <sub>3</sub> ) <sub>2</sub> | Reichardt's dye | Acetone + 0.5% H <sub>2</sub> O       | 840 ± 280    | 58 | 940  |
| NaN(SO <sub>2</sub> CF <sub>3</sub> ) <sub>2</sub> | Reichardt's dye | Acetone + 1% H <sub>2</sub> O         | 550 ± 120    | 55 | 1104 |
| KBPh <sub>4</sub>                                  | Reichardt's dye | Acetone + 0.1% H <sub>2</sub> O       | 260 ± 21     | 72 | 1167 |
| KBPh <sub>4</sub>                                  | Reichardt's dye | Acetone + 0.25% H <sub>2</sub> O      | 190 ± 15     | 68 | 867  |
| KBPh <sub>4</sub>                                  | Reichardt's dye | Acetone + 0.5% H <sub>2</sub> O       | 170 ± 18     | 56 | 173  |
| KBPh <sub>4</sub>                                  | Reichardt's dye | Acetonitrile + 1% H <sub>2</sub> O    | 132 ± 70     | 54 | 912  |

*Table S1.* Association constants for the H-bonded complexes formed between **1** and **3-27** in the different solvents at 298 K. <sup>a</sup>Experimental results are the average of at least two titrations and errors are quoted at the 95% confidence limit.

## 22. Summary of $^{31}\text{P}$ NMR Spectroscopy Titration Experiments.

| Hydrogen Bond Donor                                | Acceptor        | Solvent      | $K (\text{M}^{-1})^a$ | % bound | $\delta_{\text{bound}}$ |
|----------------------------------------------------|-----------------|--------------|-----------------------|---------|-------------------------|
| Phenol                                             | Phosphine oxide | Chloroform   | $38 \pm 2$            | 60      | 54.104                  |
| Phenol                                             | Phosphine oxide | Acetone      | $26 \pm 1$            | 64      | 52.273                  |
| Phenol                                             | Phosphine oxide | Acetonitrile | $20 \pm 1$            | 78      | 53.096                  |
| 5-nitroindole                                      | Phosphine oxide | Acetone      | $11 \pm 1$            | 80      | 51.649                  |
| 5-nitroindole                                      | Phosphine oxide | Acetonitrile | $6 \pm 1$             | 68      | 52.278                  |
| 4-phenylazophenol                                  | Phosphine oxide | Chloroform   | $193 \pm 27$          | 60      | 53.717                  |
| 4-phenylazophenol                                  | Phosphine oxide | Acetone      | $65 \pm 6$            | 76      | 53.007                  |
| 4-phenylazophenol                                  | Phosphine oxide | Acetonitrile | $58 \pm 4$            | 74      | 53.590                  |
| 4-nitrophenol                                      | Phosphine oxide | Chloroform   | $1416 \pm 208$        | 82      | 54.076                  |
| 4-nitrophenol                                      | Phosphine oxide | Acetone      | $134 \pm 18$          | 89      | 54.286                  |
| 4-nitrophenol                                      | Phosphine oxide | Acetonitrile | $102 \pm 34$          | 73      | 54.495                  |
| 4-nitro,3-CF <sub>3</sub> phenol                   | Phosphine oxide | Chloroform   | $5370 \pm 294$        | 66      | 54.166                  |
| 4-nitro,3-CF <sub>3</sub> phenol                   | Phosphine oxide | Acetone      | $282 \pm 108$         | 90      | 54.851                  |
| 4-nitro,3-CF <sub>3</sub> phenol                   | Phosphine oxide | Acetonitrile | $266 \pm 22$          | 90      | 55.084                  |
| GuanidiniumBPh <sub>4</sub>                        | Phosphine oxide | Acetone      | $225 \pm 40$          | 88      | 52.555                  |
| GuanidiniumBPh <sub>4</sub>                        | Phosphine oxide | Acetonitrile | $198 \pm 61$          | 85      | 53.477                  |
| RNH <sub>3</sub> BPh <sub>4</sub>                  | Phosphine oxide | Acetone      | $123 \pm 34$          | 80      | 54.076                  |
| RNH <sub>3</sub> BPh <sub>4</sub>                  | Phosphine oxide | Acetonitrile | $147 \pm 25$          | 78      | 53.010                  |
| Et <sub>3</sub> NHBPh <sub>4</sub>                 | Phosphine oxide | Acetone      | $203 \pm 50$          | 80      | 54.076                  |
| Et <sub>3</sub> NHBPh <sub>4</sub>                 | Phosphine oxide | Acetonitrile | $85 \pm 6$            | 66      | 53.671                  |
| ImidazoliumHBPh <sub>4</sub>                       | Phosphine oxide | Acetone      | $156 \pm 18$          | 80      | 54.396                  |
| ImidazoliumHBPh <sub>4</sub>                       | Phosphine oxide | Acetonitrile | $102 \pm 12$          | 75      | 55.027                  |
| NaBPh <sub>4</sub>                                 | Phosphine oxide | Acetone      | $73 \pm 5$            | 71      | 50.579                  |
| KBPh <sub>4</sub>                                  | Phosphine oxide | Acetone      | $13 \pm 3$            | 51      | 49.249                  |
| AgBF <sub>4</sub>                                  | Phosphine oxide | Acetonitrile | $8 \pm 1$             | 65      | 57.751                  |
| AgBF <sub>4</sub>                                  | Phosphine oxide | Acetone      | $966 \pm 40$          | 98      | 59.117                  |
| IPh <sub>2</sub> PF <sub>6</sub>                   | Phosphine oxide | Acetone      | $83 \pm 12$           | 72      | 52.346                  |
| IPh <sub>2</sub> PF <sub>6</sub>                   | Phosphine oxide | Acetonitrile | $62 \pm 3$            | 67      | 52.517                  |
| NaPF <sub>6</sub>                                  | Phosphine oxide | Acetone      | $55 \pm 13$           | 68      | 52.530                  |
| NaBF <sub>4</sub>                                  | Phosphine oxide | Acetone      | $57 \pm 2$            | 69      | 49.525                  |
| NaBF <sub>4</sub>                                  | Phosphine oxide | Acetonitrile | $57 \pm 6$            | 68      | 50.148                  |
| NaBAr <sup>F</sup>                                 | Phosphine oxide | Acetone      | $72 \pm 2$            | 71      | 50.632                  |
| NaBAr <sup>F</sup>                                 | Phosphine oxide | Acetonitrile | $53 \pm 3$            | 64      | 50.819                  |
| NaN(SO <sub>2</sub> CF <sub>3</sub> ) <sub>2</sub> | Phosphine oxide | Acetone      | $78 \pm 12$           | 71      | 50.393                  |
| NaN(SO <sub>2</sub> CF <sub>3</sub> ) <sub>2</sub> | Phosphine oxide | Acetonitrile | $56 \pm 5$            | 66      | 50.569                  |
| NaI                                                | Phosphine oxide | Acetone      | $59 \pm 6$            | 70      | 50.606                  |
| NaI                                                | Phosphine oxide | Acetonitrile | $45 \pm 1$            | 60      | 50.677                  |

Table S2. Association constants for the H-bonded complexes formed between **2** and **8-27** in the different solvents at 298 K. <sup>a</sup>Experimental results are the average of at least two titrations and errors are quoted at the 95% confidence limit.

### 23. Summary of $^1\text{H}$ NMR Spectroscopy Titration Experiments.

| Hydrogen Bond Donor               | Acceptor        | Solvent              | $K \text{ (M}^{-1}\text{)}^a$ | % bound | $\delta_{\text{bound}}$ |
|-----------------------------------|-----------------|----------------------|-------------------------------|---------|-------------------------|
| Phenol ( $\alpha$ -CH)            | Phosphine oxide | Carbon tetrachloride | $1860 \pm 226$                | 78      | 7.126                   |
| 5-nitroindole (NH)                | Phosphine oxide | Carbon tetrachloride | $1350 \pm 480$                | 82      | 12.171                  |
| 4-phenylazophenol ( $\alpha$ -CH) | Phosphine oxide | Carbon tetrachloride | $14350 \pm 2404$              | 82      | 7.415                   |
| 4-nitrophenol ( $\alpha$ -CH)     | Phosphine oxide | Carbon tetrachloride | $142000 \pm 26870$            | 93      | 8.151                   |

*Table S3.* Association constants for the H-bonded complexes formed between **2** and **3-6** in the different solvents at 298 K. <sup>a</sup>Experimental results are the average of at least two titrations and errors are quoted at the 95% confidence limit.

## 22. Influence of the Counterion in Acetonitrile on $K$ values of H-bonded complexes

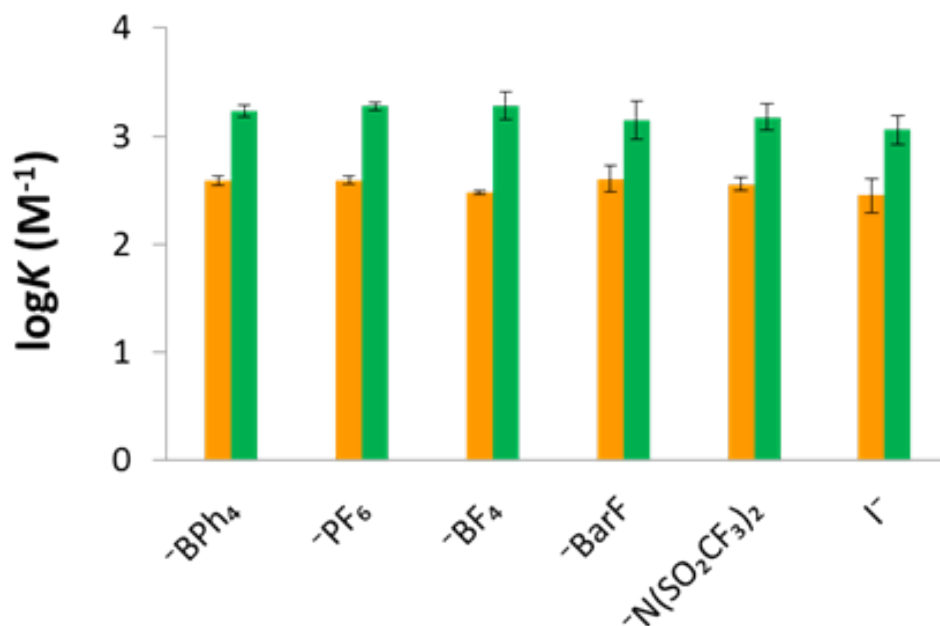

*Graph S221.*  $\log K$  (M<sup>-1</sup>) values for association constants of H-bonded complexes **1**·Na<sup>+</sup> in acetonitrile and acetone obtained using UV/Vis absorption titration experiments with different counter-anions. The association constants obtained in acetonitrile are shown in orange and those obtained in acetone are shown in green.

*Graph S222.*  $\log K$  ( $M^{-1}$ ) values for association constants of H-bonded complexes **1**·Na<sup>+</sup> in acetonitrile and acetone obtained using UV/Vis absorption titration experiments with different counter-anions. The association constants obtained in acetonitrile are shown in orange and those obtained in acetone are shown in green.

### 23. Influence of the H<sub>2</sub>O content in Acetonitrile on *K* values of H-bonded complexes

#### a) Titrations of **1** with 4-phenylazophenol in the presence of H<sub>2</sub>O

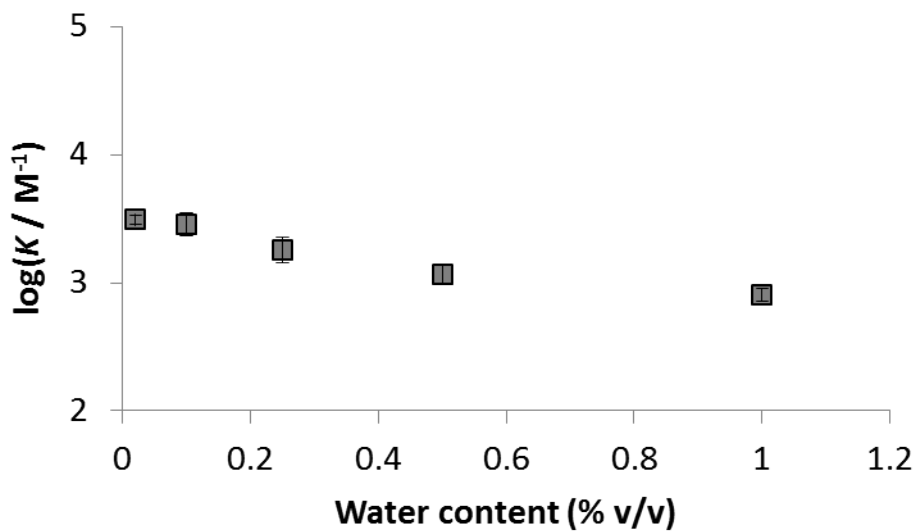

*Graph S223.* Graph showing correlation between % H<sub>2</sub>O present in acetonitrile host solution and the log*K* value obtained from the titration of 4-phenylazophenol with **1** with varying amounts of H<sub>2</sub>O added to the host solution.



**b) Titrations of **1** with  $\text{NaN}(\text{SO}_2\text{CF}_3)_2$  in the presence of  $\text{H}_2\text{O}$**

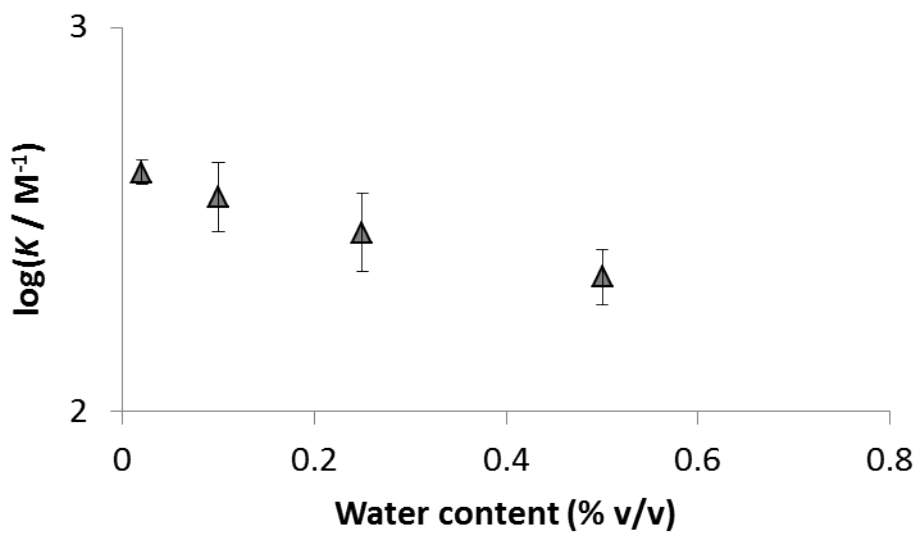

*Graph S224.* Graph showing correlation between %  $\text{H}_2\text{O}$  present in acetonitrile host solution and the  $K$  value obtained from the titration of  $\text{NaN}(\text{SO}_2\text{CF}_3)_2$  with **1** with varying amounts of  $\text{H}_2\text{O}$  added to the host solution.

c) Titrations of **1** with guanidiniumBPh<sub>4</sub> in the presence of H<sub>2</sub>O

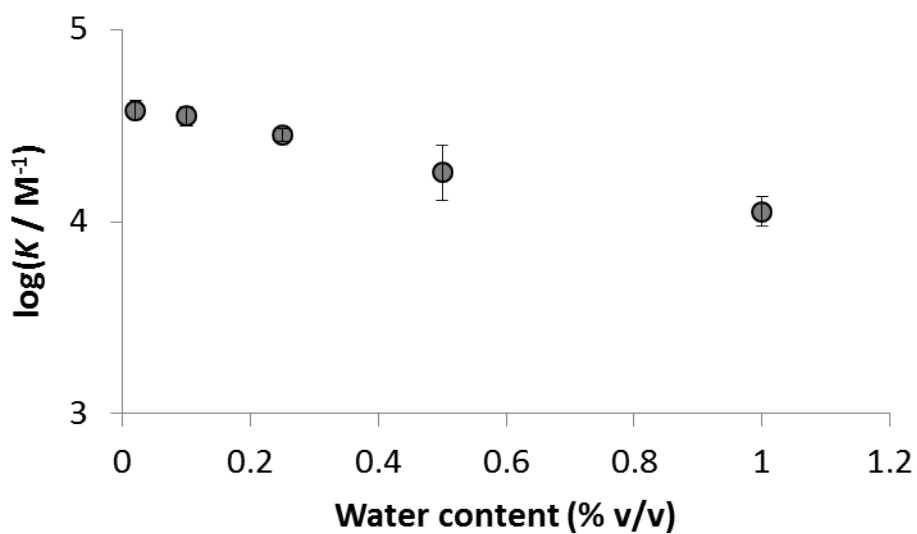

*Graph S225.* Graph showing correlation between % H<sub>2</sub>O present in acetonitrile host solution and the *K* value obtained from the titration of guanidiniumBPh<sub>4</sub> with **1** with varying amounts of H<sub>2</sub>O added to the host solution.

d) Titrations of **1** with 4-phenylazophenol,  $\text{NaN}(\text{SO}_2\text{CF}_3)_2$  and guanidiniumBPh<sub>4</sub> in the presence of H<sub>2</sub>O

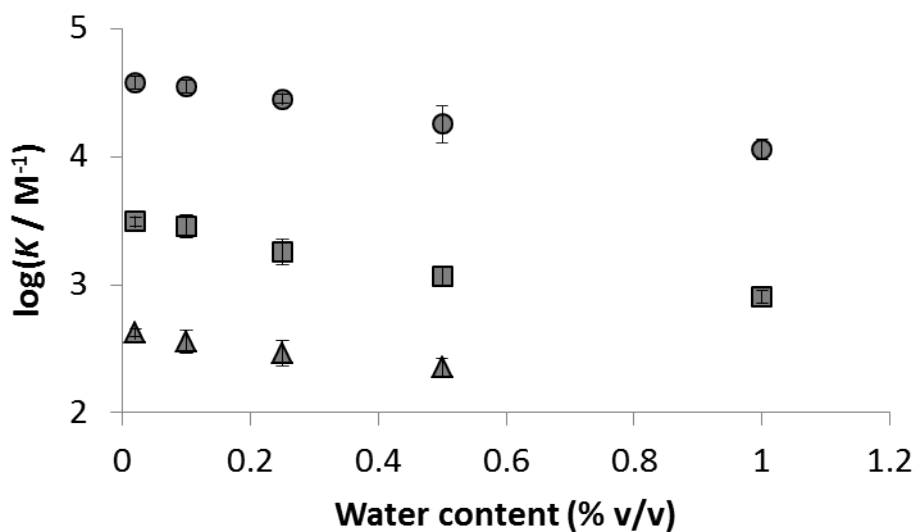

*Graph S226.* Graph showing correlation between % H<sub>2</sub>O present in acetonitrile host solution and the  $K$  value obtained from the titration of 4-phenylazophenol,  $\text{NaN}(\text{SO}_2\text{CF}_3)_2$  and guanidiniumBPh<sub>4</sub> with **1** with varying amounts of H<sub>2</sub>O added to the host solution. **1**·guanidiniumBPh<sub>4</sub> complexes shown in circles, **1**·4-phenylazophenol complexes shown in squares, **1**· $\text{NaN}(\text{SO}_2\text{CF}_3)_2$  complexes shown in triangles.

e) Summary of the influence of water on the  $K$  and  $\alpha$  values for titrations of Reichardt's dye with Guanidinium BPh<sub>4</sub>, Na(NSO<sub>2</sub>CF<sub>3</sub>)<sub>2</sub> and 4-phenylazophenol in acetonitrile

| Hydrogen Bond Donor                                | H <sub>2</sub> O Content in Stock Solution | $K$ (M <sup>-1</sup> ) <sup>a</sup> |
|----------------------------------------------------|--------------------------------------------|-------------------------------------|
| 4-phenylazophenol                                  | 0.02                                       | 3100 ± 650                          |
| 4-phenylazophenol                                  | 0.1                                        | 2700 ± 560                          |
| 4-phenylazophenol                                  | 0.25                                       | 1600 ± 380                          |
| 4-phenylazophenol                                  | 0.5                                        | 1100 ± 180                          |
| 4-phenylazophenol                                  | 1                                          | 800 ± 20                            |
| Na(NSO <sub>2</sub> CF <sub>3</sub> ) <sub>2</sub> | 0.02                                       | 410 ± 30                            |
| Na(NSO <sub>2</sub> CF <sub>3</sub> ) <sub>2</sub> | 0.1                                        | 380 ± 38                            |
| Na(NSO <sub>2</sub> CF <sub>3</sub> ) <sub>2</sub> | 0.25                                       | 290 ± 18                            |
| Na(NSO <sub>2</sub> CF <sub>3</sub> ) <sub>2</sub> | 0.5                                        | 250 ± 60                            |
| Guanidinium.BPh <sub>4</sub>                       | 0.02                                       | 33800 ± 2000                        |
| Guanidinium.BPh <sub>4</sub>                       | 0.1                                        | 34000 ± 3800                        |
| Guanidinium.BPh <sub>4</sub>                       | 0.25                                       | 27000 ± 2000                        |
| Guanidinium.BPh <sub>4</sub>                       | 0.5                                        | 12600 ± 4200                        |
| Guanidinium.BPh <sub>4</sub>                       | 1                                          | 11000 ± 2000                        |

Table

S2. Summary of  $K$  and  $\alpha$  values for the H-bonded complexes involving **1** and Guanidinium BPh<sub>4</sub>, Na(NSO<sub>2</sub>CF<sub>3</sub>)<sub>2</sub> and 4-phenylazophenol in acetonitrile with varying quantities of H<sub>2</sub>O added to the stock solution.<sup>a</sup>Experimental results are the average of at least two titrations and errors are quoted at the 95% confidence limit.

## 24. Influence of the H<sub>2</sub>O content in Acetone on *K* values of H-bonded complexes

### a) Titrations of **1** with 4-phenylazophenol in the presence of H<sub>2</sub>O

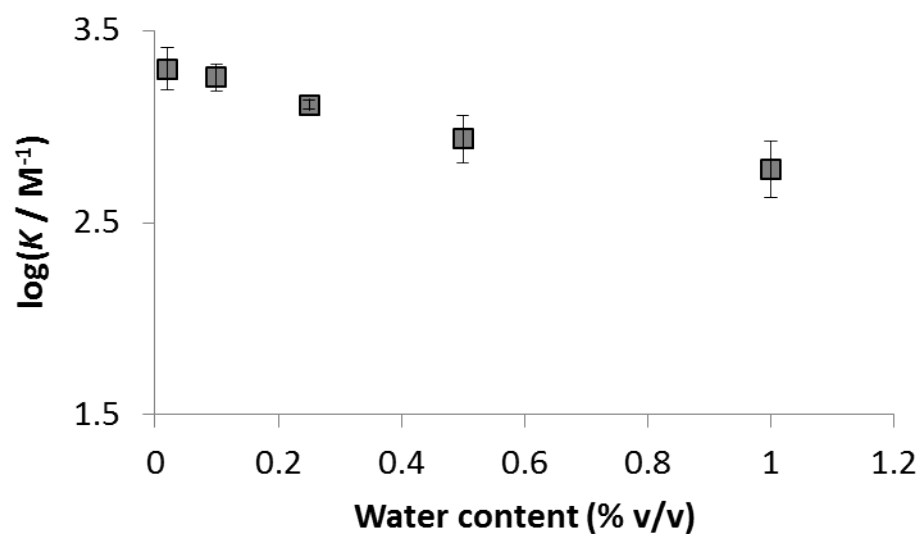

*Graph S227.* Graph showing correlation between % H<sub>2</sub>O present in acetone host solution and the log*K* value obtained from the titration of 4-phenylazophenol with **1** with varying amounts of H<sub>2</sub>O added to the host solution.

**b) Titrations of **1** with  $\text{NaN}(\text{SO}_2\text{CF}_3)_2$  in the presence of  $\text{H}_2\text{O}$**

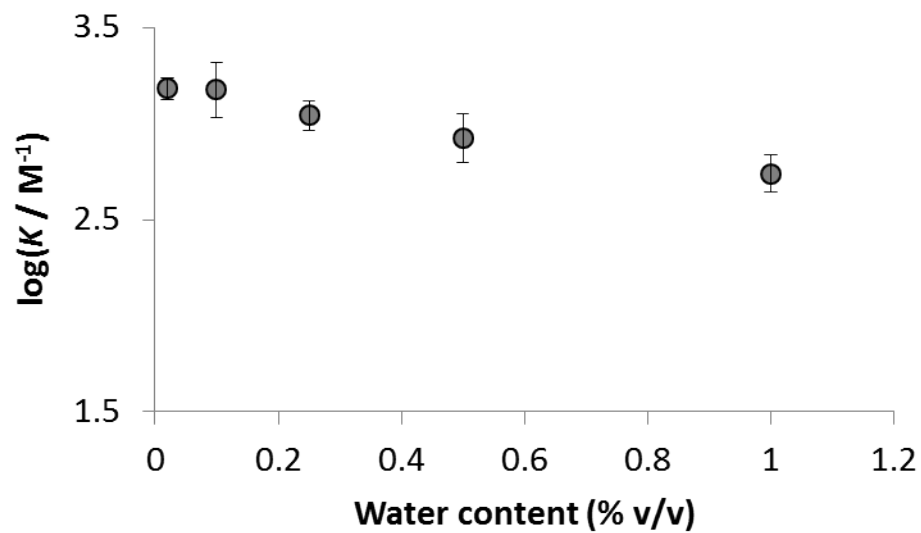

*Graph S228.* Graph showing correlation between %  $\text{H}_2\text{O}$  present in acetone host solution and the  $K$  value obtained from the titration of  $\text{NaN}(\text{SO}_2\text{CF}_3)_2$  with **1** with varying amounts of  $\text{H}_2\text{O}$  added to the host solution.

c) Titrations of **1** with KBPh<sub>4</sub> in the presence of H<sub>2</sub>O

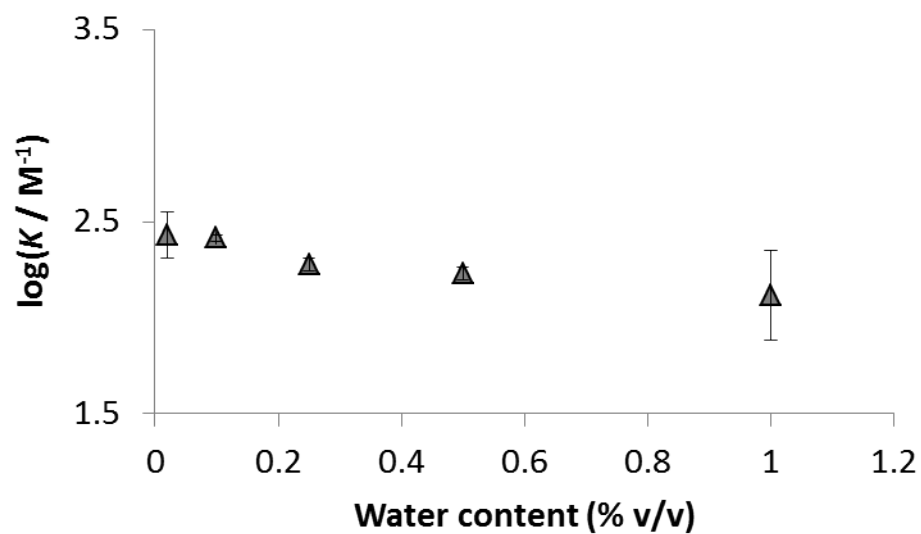

*Graph S229.* Graph showing correlation between % H<sub>2</sub>O present in acetone host solution and the *K* value obtained from the titration of KBPh<sub>4</sub> with **1** with varying amounts of H<sub>2</sub>O added to the host solution.

d) Titrations of **1** with 4-phenylazophenol,  $\text{NaN}(\text{SO}_2\text{CF}_3)_2$  and guanidiniumBPh<sub>4</sub> in the presence of H<sub>2</sub>O

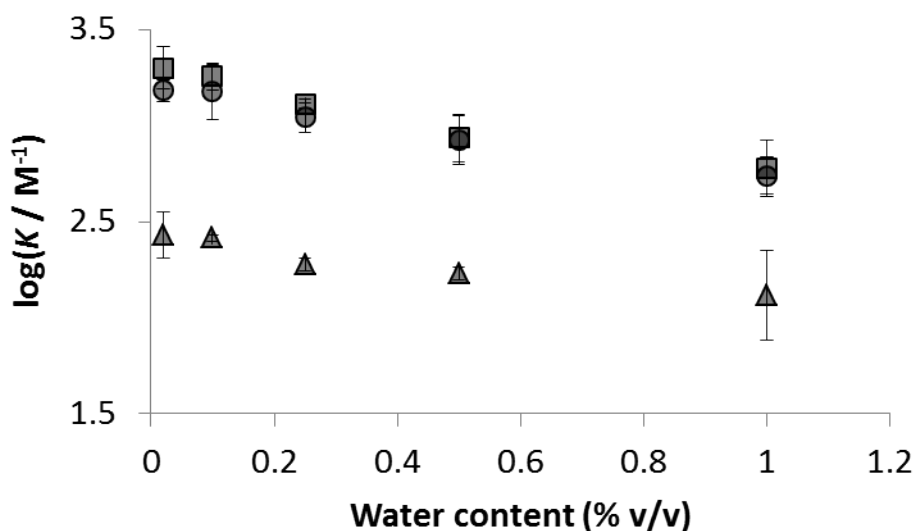

*Graph S230.* Graph showing correlation between % H<sub>2</sub>O present in acetone host solution and the  $K$  value obtained from the titration of 4-phenylazophenol,  $\text{NaN}(\text{SO}_2\text{CF}_3)_2$  and KBPh<sub>4</sub> with **1** with varying amounts of H<sub>2</sub>O added to the host solution.  $\text{1} \cdot \text{NaN}(\text{SO}_2\text{CF}_3)_2$  complexes shown in circles,  $\text{1} \cdot \text{4-phenylazophenol}$  complexes shown in squares,  $\text{1} \cdot \text{KBPh}_4$  complexes shown in triangles.



e) Summary of the influence of water on the  $K$  and  $\alpha$  values for titrations of Reichardt's dye with 4-phenylazophenol,  $\text{Na}(\text{NSO}_2\text{CF}_3)_2$  and  $\text{KBPh}_4$  in acetone

| Hydrogen Bond Donor                    | H <sub>2</sub> O Content in Stock Solution | $K \text{ (M}^{-1}\text{)}^a$ |
|----------------------------------------|--------------------------------------------|-------------------------------|
| 4-phenylazophenol                      | 0.02                                       | $2000 \pm 500$                |
| 4-phenylazophenol                      | 0.1                                        | $1800 \pm 280$                |
| 4-phenylazophenol                      | 0.25                                       | $1300 \pm 71$                 |
| 4-phenylazophenol                      | 0.5                                        | $860 \pm 240$                 |
| 4-phenylazophenol                      | 1                                          | $600 \pm 200$                 |
| $\text{Na}(\text{NSO}_2\text{CF}_3)_2$ | 0.02                                       | $1500 \pm 50$                 |
| $\text{Na}(\text{NSO}_2\text{CF}_3)_2$ | 0.1                                        | $1500 \pm 200$                |
| $\text{Na}(\text{NSO}_2\text{CF}_3)_2$ | 0.25                                       | $1100 \pm 200$                |
| $\text{Na}(\text{NSO}_2\text{CF}_3)_2$ | 0.5                                        | $840 \pm 280$                 |
| $\text{Na}(\text{NSO}_2\text{CF}_3)_2$ | 1                                          | $550 \pm 120$                 |
| $\text{KBPh}_4$                        | 0.02                                       | $270 \pm 75$                  |
| $\text{KBPh}_4$                        | 0.1                                        | $260 \pm 21$                  |
| $\text{KBPh}_4$                        | 0.25                                       | $190 \pm 15$                  |
| $\text{KBPh}_4$                        | 0.5                                        | $170 \pm 18$                  |
| $\text{KBPh}_4$                        | 1                                          | $130 \pm 70$                  |

*Table S3.* Summary of  $K$  and  $\alpha$  values for the H-bonded complexes involving **1** and 4-phenylazophenol,  $\text{Na}(\text{NSO}_2\text{CF}_3)_2$  and  $\text{KBPh}_4$  in acetone with varying quantities of  $\text{H}_2\text{O}$  added to the stock solution.<sup>a</sup>Experimental results are the average of at least two titrations and errors are quoted at the 95% confidence limit.

## 25. Appendix: $^1\text{H}$ and $^{13}\text{C}$ NMR spectra and mass spec

$^1\text{H}$  NMR spectrum of guanidinium.BPh<sub>4</sub> in CD<sub>3</sub>CN

**$^1\text{H}$  NMR spectrum of imidazolium.BPh<sub>4</sub> in (CD<sub>3</sub>)<sub>2</sub>SO**

**$^1\text{H}$  NMR spectrum of  $\text{Et}_3\text{NH}^+\text{BPh}_4^-$  in  $(\text{CD}_3)_2\text{SO}$**

**$^1\text{H}$  NMR spectrum of 2-ethylhexylammonium.BPh<sub>4</sub> in (CD<sub>3</sub>)<sub>2</sub>CO**

**$^{13}\text{C}$  NMR spectrum of guanidinium.BPh<sub>4</sub> in CD<sub>3</sub>CN**

**$^{13}\text{C}$  NMR spectrum of imidazolium.BPh<sub>4</sub> in (CD<sub>3</sub>)<sub>2</sub>SO**

**$^{13}\text{C}$  NMR spectrum of  $\text{Et}_3\text{NH}^+\text{BPh}_4$  in  $(\text{CD}_3)_2\text{SO}$**



**$^{13}\text{C}$  NMR spectrum of 2-ethylhexylammonium.BPh<sub>4</sub> in THF-d<sub>8</sub>**

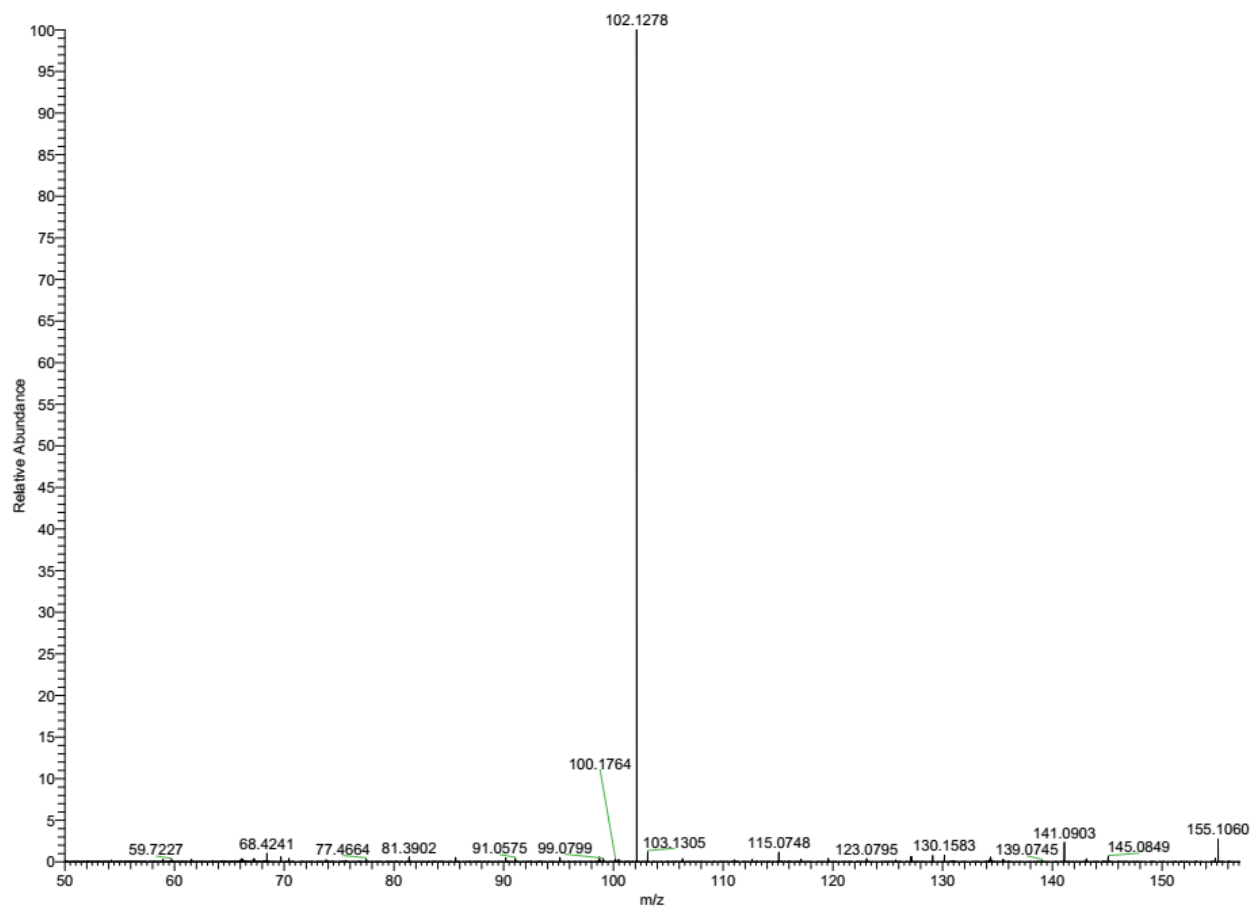

Mass spectrum of  $\text{Et}_3\text{NH}^+\text{-BPh}_4$

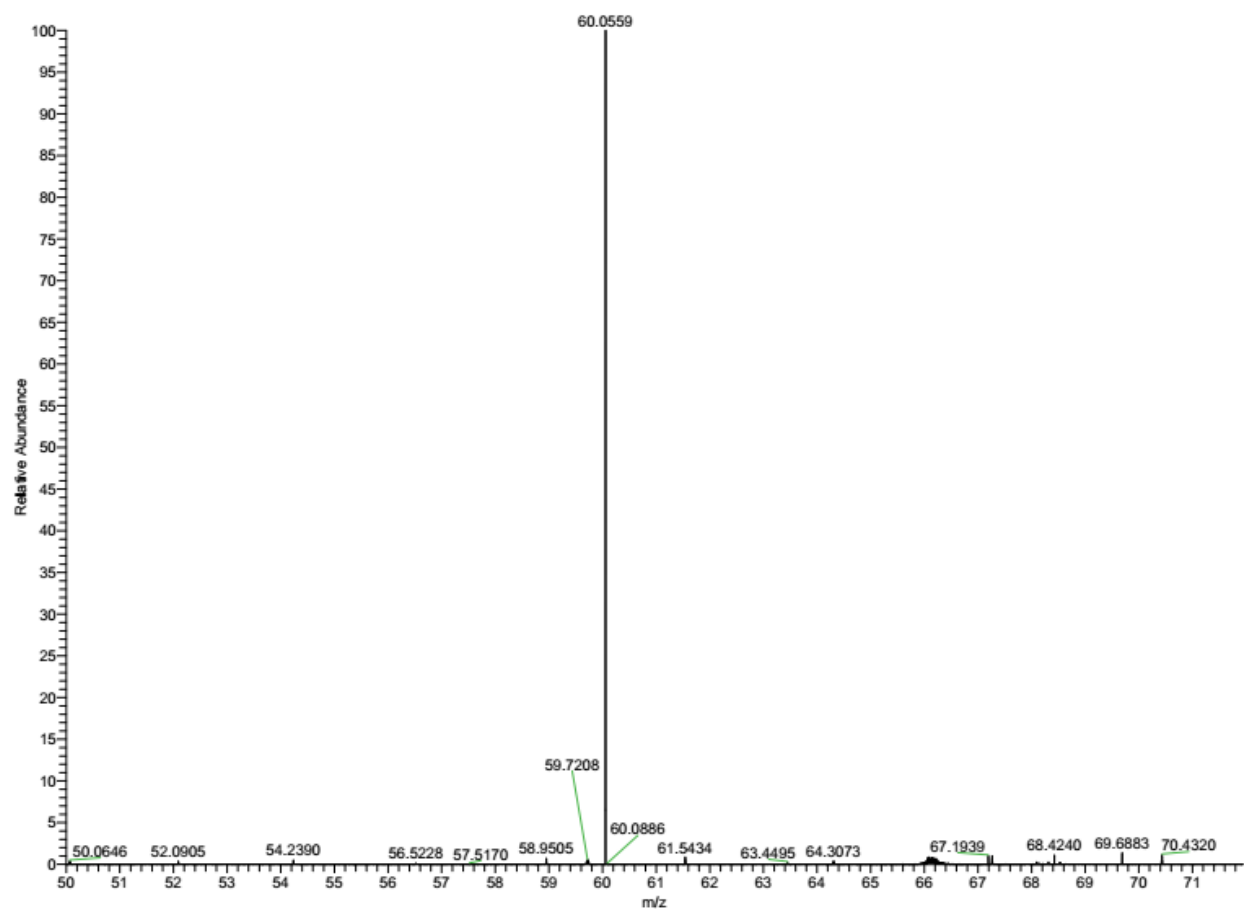

**Mass spectrum of guanidinium.BPh<sub>4</sub>**

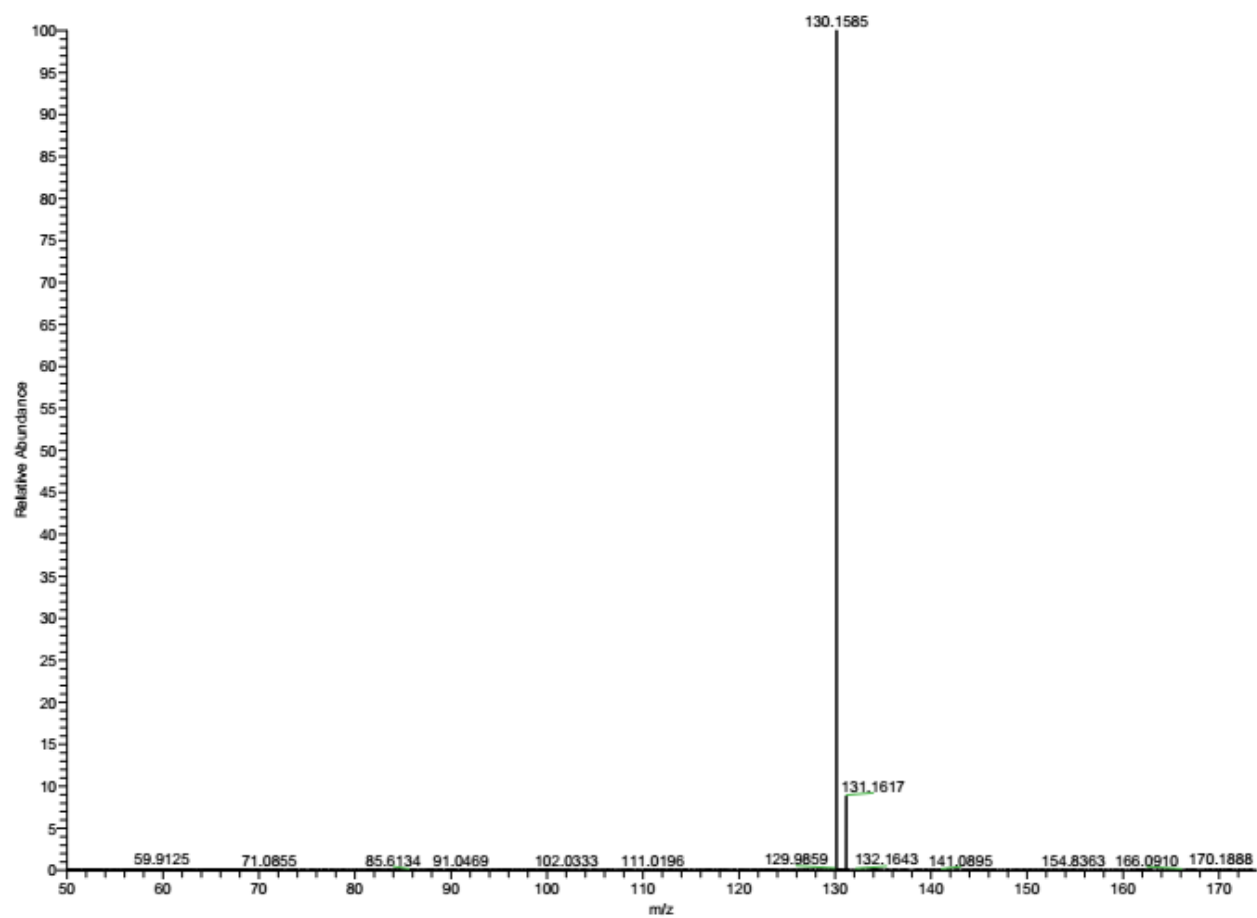

Mass spectrum of 2-ethylhexylammonium.BPh<sub>4</sub>

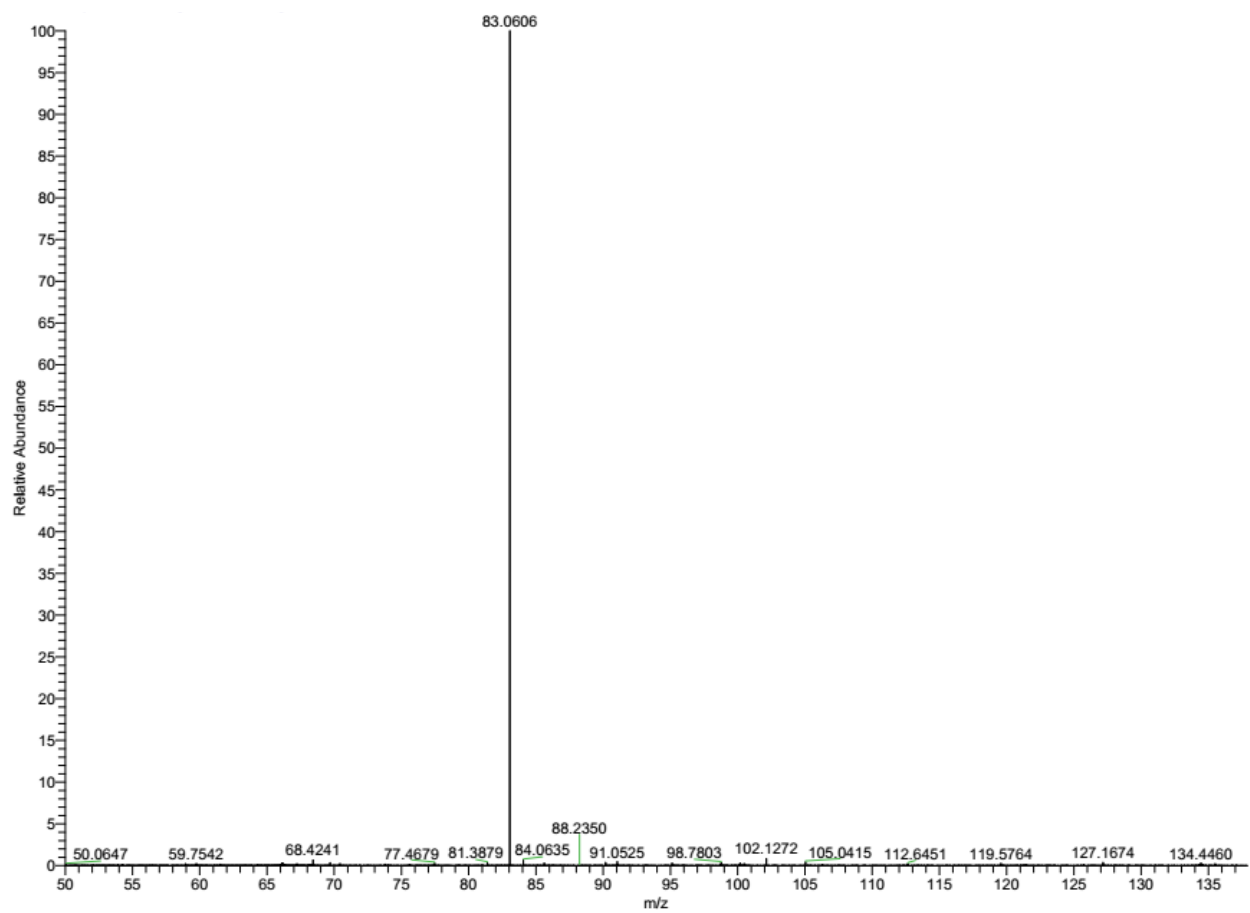

**Mass spectrum of 1-methylimidazolium.BPh<sub>4</sub>**

## 32. References

1. V. Amenta, J. L. Cook, C. A. Hunter, C. M. R. Low, J. G. Vinter, *J. Phys. Chem. B.*, **2012**, *116*, 14443-14440.
2. V. Amenta, J. L. Cook, C. A. Hunter, C. M. R. Low, J. G. Vinter, *Org. Biomol. Chem.*, **2011**, *9*, 7571-7578.
3. S. J. Pike, J. J. Hutchinson, C. A. Hunter, *J. Am. Chem. Soc.*, **2017**, *139*, 6700-6706.
4. R. A. Cabot, C. A. Hunter, L. M. Varley, *Org. Biomol. Chem.*, **2010**, *8*, 1455-1462.
5. J. L. Cook, C. A. Hunter, C. M. R. Low, A. Perez-Velasco, J. G. Vinter, *Angew. Chem. Int. Ed.*, **2007**, *46*, 3706-3709.
6. J. McKenzie, N. Feeder, C. A. Hunter, *Cryst. Eng. Comm.*, **2016**, *18*, 394.
7. C. A. Hunter, *Angew. Chem. Int. Ed.*, **2004**, *43*, 5310-5324.
